# Supplementary material for: ASFVdb: an integrative resource for genomic and proteomic analyses of African swine fever virus
Source: Database (Oxford). 2020 Apr 15;2020:baaa023. doi: 10.1093/database/baaa023 (PMC7159030; doi:10.1093/database/baaa023)
Supplement: Supplemental_Tables_baaa023 [file supplemental_tables_baaa023.xls]

## Sheet: Table S1
Table S1. ASFV strains in ASFVdb
GenBank ID	Name	Location	Strain	Isolated Date
KP055815.1	Spain_BA71_1971	Spain, Badajoz	BA71	1971
MK128995.1	China_AnhuiXCGQ_2018	China	China/2018/AnhuiXCGQ	2018
MH766894.1	China_ASFV-SY18_2018	China	ASFV-SY18	2018
MK333180.1	China_HLJ_2018	China	Pig/HLJ/2018	2018
MK333181.1	China_LN_2018	China	DB/LN/2018	2018
MG939583.1	Poland_Pol16_20186_o7_2016-2017	Poland	Pol16_20186_o7	2016-2017
MG939584.1	Poland_Pol16_20538_o9_2016-2017	Poland	Pol16_20538_o9	2016-2017
MG939585.1	Poland_Pol16_20540_o10_2016-2017	Poland	Pol16_20540_o10	2016-2017
MG939586.1	Poland_Pol16_29413_o23_2016-2017	Poland	Pol16_29413_o23	2016-2017
MG939587.1	Poland_Pol17_03029_C201_2016-2017	Poland	Pol17_03029_C201	2016-2017
MG939588.1	Poland_Pol17_04461_C210_2016-2017	Poland	Pol17_04461_C210	2016-2017
MG939589.1	Poland_Pol17_05838_C220_2016-2017	Poland	Pol17_05838_C220	2016-2017
MH681419.1	Poland_ASFV_POL_Podlaskie_2015	Poland	ASFV/POL/2015/Podlaskie	2015
MH025916.1	Uganda_R8_2015	Uganda, Tororo district	R8	2015
MH025917.1	Uganda_R7_2015	Uganda, Tororo district	R7	2015
MH025918.1	Uganda_R25_2015	Uganda, Tororo district	R25	2015
MH025919.1	Uganda_N10_2015	Uganda, Tororo district	N10	2015
MH025920.1	Uganda_R35_2015	Uganda, Tororo district	R35	2015
LS478113.1	Estonia_2014	Estonia	Estonia 2014	2014
KM102979.1	Italy_26544_OG10_2010	Sardinian,Italy	26544/OG10	2010
KX354450.1	Italy_47_Ss_2008_2008	Sardinia, Italy	47/Ss/2008	2008
AM712240.1	Portugal_OURT_88.3_1988	Portugal	OURT 88/3	1988
FN557520.1	Spain_E75_1975	Spain	E75	1975
FR682468.1	Russia_Georgia_2007	Russia	Georgia 2007/1	2007
KM111294.1	Kenya_Tk1_2005	Kenya	Ken05/Tk1	2005
KM111295.1	Kenya_Bus_2006	Kenya	Ken06.Bus	2006
KP843857.1	Russia_Odintsovo_2014	Russia	Odintsovo_02/14	2014
KM262844.1	Portugal_L60_1960	Portugal	L60	1960
KM262845.1	Portugal_NHV_1968	Portugal	NHV	1968
KJ747406.1	Russia_Kashino_2013	Russia	Kashino 04/13	2013
AM712239.1	Germany_Benin_1997	Benin	Benin 97/1	1997
AY261363.1	South_Africa_KNP_Pretorisuskop_1996	South Africa, Kruger National Park	Pretorisuskop/96/4	1996
AY261362.1	South_Africa_MGR_Mkuzi_1979	South Africa, Mkuzi Game Reserve	Mkuzi 1979	1979
AY261361.1	Malawi_Lil_1983	Malawi, Chalaswa	Malawi Lil-20/1 (1983)	1983
AY261360.1	Kenya_1950	Kenya	Kenya 1950	1950
AY261366.1	Namibia_Warthog_1980	Namibia	Warthog	1980
AY261365.1	South_Africa_Warmbaths_1987	South Africa, Warmbaths	Warmbaths	1987
AY261364.1	Malawi_Tengani_1962	Malawi, Tengani, Nsanje District	Tengani 62	1962
MK645909.1	China_wbBS01_2018	China, Jilin	ASFV-wbBS01	2018
MN194591.1	Ukraine_Kyiv_2014	Ukraine	ASFV/Kyiv/2016/131	2014
MK543947.1	Belgium_Etalle_wb_2018	Belgium	Belgium/Etalle/wb/2018	2018
MK628478.1	Lithuania_LT14_2014	Lithuania	ASFV/LT14/1490	2014
MN394630.1	South_Africa_1985	South Africa	SPEC_57	1985
MN336500.1	South_Africa_2_2008	South Africa	RSA_2_2008	2008
MN318203.1	Zambia_LIV_1983	Zambia	LIV_5_40	1983

## Sheet: Table S2
Table S2. Presence of gene clusters in all ASFV strains. "number|number" denotes the counts of conserved ORFs and the counts of conserved ORFs or genetic remains. "Conserved" denotes the occurrence of conserved ORFs in all strains, with "Y" indicating yes, and "N" indicating no.
Clusters	Spain_BA71_1971	China_AnhuiXCGQ_2018	China_ASFV-SY18_2018	Poland_Pol16_20186_o7_2016-2017	Poland_Pol16_20538_o9_2016-2017	Poland_Pol16_20540_o10_2016-2017	Poland_Pol16_29413_o23_2016-2017	Poland_Pol17_03029_C201_2016-2017	Poland_Pol17_04461_C210_2016-2017	Poland_Pol17_05838_C220_2016-2017	Poland_ASFV_POL_Podlaskie_2015	Uganda_R8_2015	Uganda_R7_2015	Uganda_R25_2015	Uganda_N10_2015	Uganda_R35_2015	Estonia_2014	Italy_26544_OG10_2010	Italy_47_Ss_2008_2008	Portugal_OURT_88.3_1988	Spain_E75_1975	Russia_Georgia_2007	Kenya_Tk1_2005	Kenya_Bus_2006	Russia_Odintsovo_2014	Portugal_L60_1960	Portugal_NHV_1968	Russia_Kashino_2013	Benin_1997	South_Africa_KNP_Pretorisuskop_1996	South_Africa_MGR_Mkuzi_1979	Malawi_Lil_1983	Kenya_1950	Namibia_Warthog_1980	South_Africa_Warmbaths_1987	Malawi_Tengani_1962	China_HLJ_2018	China_LN_2018	China_wbBS01_2018	Ukraine_Kyiv_2014	Belgium_Etalle_wb_2018	Lithuania_LT14_2014	South_Africa_1985	South_Africa_2_2008	Zambia_LIV_1983	Conserved
Cluster0	1|1	1|1	1|1	1|1	1|1	0|1	0|1	1|1	1|1	0|1	0|1	1|1	1|1	1|1	1|1	1|1	1|1	1|1	1|1	1|1	1|1	1|1	1|1	2|2	0|1	1|1	1|1	0|1	1|1	0|1	0|1	1|1	1|1	0|1	0|1	0|1	1|1	1|1	1|1	3|3	1|1	1|1	0|0	0|0	0|0	N
Cluster1	0|0	0|0	0|0	0|0	0|0	0|0	0|0	0|0	0|0	0|0	0|0	0|0	0|0	0|0	0|0	0|0	0|0	0|0	0|0	0|0	0|0	0|0	0|0	0|0	0|0	0|0	0|0	0|0	0|0	0|0	0|0	0|0	0|0	0|0	0|0	0|0	0|0	0|0	0|0	0|0	0|0	0|0	0|0	0|0	2|2	N
Cluster2	0|0	0|0	0|0	0|0	0|0	0|0	0|0	0|0	0|0	0|0	0|0	0|0	0|0	0|0	0|0	0|0	0|0	0|0	0|0	0|0	1|1	0|0	0|0	0|0	0|0	0|0	0|0	0|0	0|0	0|0	0|0	0|0	0|0	0|0	0|0	0|0	0|0	0|0	0|0	1|1	0|0	0|0	0|0	0|0	4|4	N
Cluster3	0|0	0|0	0|0	0|0	0|0	0|0	0|0	0|0	0|0	0|0	0|0	0|0	0|0	0|0	0|0	0|0	0|0	0|0	0|0	0|0	0|0	0|0	0|0	0|0	0|0	0|0	0|0	0|0	0|0	0|0	0|0	0|0	0|0	0|0	0|0	0|0	0|0	0|0	0|0	0|0	0|0	0|0	2|2	1|1	0|0	N
Cluster4	0|0	0|0	0|0	0|0	0|0	0|0	0|0	0|0	0|0	0|0	0|0	0|0	0|0	0|0	0|0	0|0	0|0	0|0	0|0	0|0	0|0	0|0	0|0	0|0	0|0	0|0	0|0	0|0	0|0	0|0	0|0	0|0	0|0	0|0	0|0	0|0	0|0	0|0	0|0	0|0	0|0	0|0	1|1	1|1	2|2	N
Cluster5	1|1	1|1	1|1	1|1	1|1	1|1	1|1	1|1	1|1	1|1	1|1	1|1	1|1	1|1	1|1	1|1	1|1	1|1	1|1	1|1	1|1	2|2	1|1	1|1	1|1	1|1	1|1	1|1	1|1	1|1	1|1	1|1	1|1	1|1	1|1	1|1	1|1	1|1	1|1	4|4	1|1	1|1	0|0	0|0	0|0	Y
Cluster6	0|0	0|0	1|1	0|0	0|0	0|0	0|0	0|0	0|0	0|0	0|0	0|0	0|0	0|0	0|0	0|0	0|0	0|0	3|3	0|0	0|0	0|0	0|0	0|0	0|0	0|0	0|0	0|0	0|0	0|0	0|0	0|0	0|0	0|0	0|0	0|0	0|0	0|0	0|0	0|0	0|0	0|0	1|1	1|1	2|2	N
Cluster7	1|1	1|1	1|1	1|1	1|1	1|1	1|1	1|1	1|1	1|1	1|1	1|1	1|1	1|1	1|1	1|1	1|1	1|1	1|1	1|1	1|1	1|1	1|1	1|1	1|1	1|1	1|1	1|1	2|2	1|1	0|0	1|1	1|1	1|1	1|1	1|1	1|1	1|1	1|1	3|3	1|1	1|1	0|0	0|0	0|0	Y
Cluster8	1|1	1|1	0|0	1|1	0|0	0|0	0|0	1|1	1|1	0|0	0|0	1|1	1|1	1|1	1|1	1|1	1|1	1|1	1|1	1|1	1|1	1|1	1|1	1|1	0|0	1|1	1|1	0|0	1|1	0|0	0|0	0|0	0|0	0|0	0|0	0|0	1|1	1|1	1|1	1|1	1|1	1|1	2|2	1|1	2|2	N
Cluster9	1|1	1|1	2|2	1|1	1|1	1|1	1|1	1|1	1|1	1|1	1|1	1|1	1|1	1|1	1|1	1|1	1|1	1|1	1|1	1|1	1|1	1|1	2|2	1|1	1|1	2|2	1|1	1|1	1|1	1|1	0|0	1|1	1|1	1|1	1|1	1|1	1|1	1|1	1|1	2|2	1|1	1|1	1|1	1|1	0|0	Y
Cluster10	0|0	0|0	0|0	0|0	0|0	0|0	0|0	0|0	0|0	0|0	0|0	0|0	0|0	0|0	0|0	0|0	0|0	0|0	0|0	0|0	0|0	0|0	0|0	0|0	0|0	0|0	0|0	0|0	0|0	0|0	0|0	0|0	0|0	0|0	0|0	0|0	0|0	0|0	0|0	0|0	0|0	0|0	1|1	1|1	2|2	N
Cluster11	0|0	0|0	0|0	0|0	0|0	0|0	0|0	0|0	0|0	0|0	0|0	0|0	0|0	0|0	0|0	0|0	0|0	0|0	0|0	0|0	0|0	0|0	0|0	0|0	0|0	0|0	0|0	0|0	0|0	0|0	0|0	0|0	0|0	0|0	0|0	0|0	0|0	0|0	0|0	0|0	0|0	0|0	0|0	0|0	2|2	N
Cluster12	2|2	2|2	1|1	2|2	2|2	2|2	2|2	2|2	2|2	2|2	2|2	2|2	2|2	2|2	2|2	2|2	2|2	2|2	2|2	2|2	2|2	2|2	2|2	2|2	2|2	2|2	2|2	2|2	3|3	2|2	2|2	1|2	2|2	2|2	2|2	2|2	2|2	2|2	2|2	1|1	2|2	2|2	1|2	1|2	2|2	Y
Cluster13	1|1	1|1	1|1	1|1	1|1	1|1	1|1	1|1	1|1	1|1	1|1	1|1	1|1	1|1	1|1	1|1	1|1	1|1	1|1	2|2	1|1	1|1	1|1	1|1	1|1	1|1	1|1	1|1	1|1	1|1	1|1	1|1	1|1	1|1	1|1	1|1	1|1	1|1	1|1	4|4	1|1	1|1	1|1	1|1	1|1	Y
Cluster14	1|1	1|1	1|1	1|1	1|1	1|1	1|1	1|1	1|1	1|1	1|1	1|1	1|1	1|1	1|1	1|1	1|1	1|1	1|1	1|1	1|1	1|1	1|1	1|1	1|1	1|1	1|1	1|1	2|2	1|1	1|1	1|1	1|1	1|1	1|1	1|1	1|1	1|1	1|1	4|4	1|1	1|1	1|1	1|1	0|0	Y
Cluster15	0|0	0|0	0|0	0|0	0|0	0|0	0|0	0|0	0|0	0|0	0|0	0|0	0|0	0|0	0|0	0|0	0|0	0|0	1|1	0|0	0|0	0|0	0|0	0|0	0|0	0|0	0|0	0|0	0|0	0|0	0|0	0|0	0|0	0|0	0|0	0|0	0|0	0|0	0|0	0|0	0|0	0|0	0|0	0|0	2|2	N
Cluster16	3|3	3|3	1|1	3|3	3|3	3|3	3|3	3|3	3|3	3|3	3|3	3|3	3|3	3|3	3|3	3|3	3|3	3|3	3|3	3|3	2|2	3|3	4|4	3|3	3|3	3|3	3|3	3|3	3|3	3|3	3|3	1|1	3|3	3|3	2|3	3|3	2|2	2|2	3|3	2|2	3|3	3|3	3|3	3|3	2|2	Y
Cluster17	0|0	0|0	0|0	0|0	0|0	0|0	0|0	0|0	0|0	0|0	0|0	0|0	0|0	0|0	0|0	0|0	0|0	0|0	0|0	0|0	0|0	0|0	0|0	0|0	0|0	0|0	0|0	0|0	0|0	0|0	0|0	0|0	0|0	0|0	0|0	0|0	0|0	0|0	0|0	0|0	0|0	0|0	1|1	1|1	2|2	N
Cluster18	1|1	1|1	1|1	1|1	1|1	1|1	1|1	1|1	1|1	1|1	1|1	1|1	1|1	1|1	1|1	1|1	1|1	1|1	1|1	1|1	1|1	1|1	2|2	1|1	1|1	1|1	1|1	1|1	1|1	1|1	1|1	1|1	1|1	1|1	1|1	1|1	1|1	1|1	1|1	2|2	1|1	1|1	0|0	0|0	0|0	Y
Cluster19	1|1	1|1	1|1	1|1	0|0	0|0	0|0	1|1	1|1	0|0	0|0	1|1	1|1	1|1	1|1	1|1	1|1	1|1	1|1	1|1	1|1	1|1	1|1	1|1	0|0	1|1	1|1	0|0	1|1	1|1	0|0	0|0	0|0	0|0	0|0	0|0	1|1	1|1	1|1	1|1	1|1	1|1	2|2	3|3	0|0	N
Cluster20	0|0	0|0	0|0	0|0	0|0	0|0	0|0	0|0	0|0	0|0	0|0	0|0	0|0	0|0	0|0	0|0	0|0	0|0	0|0	0|0	0|0	0|0	0|0	0|0	0|0	0|0	0|0	0|0	0|0	0|0	0|0	0|0	0|0	0|0	0|0	0|0	0|0	0|0	0|0	0|0	0|0	0|0	0|0	0|0	2|2	N
Cluster21	2|2	2|2	3|3	2|2	2|2	2|2	2|2	2|2	2|2	2|2	2|2	2|2	2|2	2|2	2|2	2|2	2|2	2|2	3|3	2|2	2|2	2|2	2|2	2|2	2|2	2|2	2|2	2|2	3|3	2|2	2|2	2|2	2|2	2|2	2|2	2|2	2|2	2|2	2|2	3|3	2|2	2|2	2|2	2|2	1|1	Y
Cluster22	2|3	2|3	1|1	2|3	2|3	2|3	2|3	2|3	2|3	2|3	2|3	2|3	2|3	2|3	2|3	2|3	2|3	2|3	2|3	2|3	2|3	2|3	3|4	2|3	2|3	2|3	2|3	2|3	2|3	2|3	2|2	2|3	2|3	2|3	2|3	2|3	2|3	2|3	2|3	3|3	2|3	2|3	2|3	2|3	1|2	Y
Cluster23	0|0	0|0	0|0	0|0	0|0	0|0	0|0	0|0	0|0	0|0	0|0	0|0	0|0	0|0	0|0	0|0	0|0	0|0	0|0	0|0	0|0	0|0	0|0	0|0	0|0	0|0	0|0	0|0	0|0	0|0	0|0	0|0	0|0	0|0	0|0	0|0	0|0	0|0	0|0	2|2	0|0	0|0	0|0	0|0	2|2	N
Cluster24	1|1	1|1	1|1	1|1	1|1	1|1	1|1	1|1	1|1	1|1	1|1	1|1	1|1	1|1	1|1	1|1	1|1	1|1	1|1	1|1	1|1	1|1	1|1	1|1	1|1	1|1	1|1	1|1	2|2	1|1	1|1	1|1	1|1	1|1	1|1	1|1	1|1	1|1	1|1	1|1	1|1	1|1	1|1	1|1	0|0	Y
Cluster25	2|2	2|2	1|1	2|2	2|2	2|2	2|2	2|2	2|2	2|2	2|2	2|2	2|2	2|2	2|2	2|2	2|2	2|2	2|2	2|2	2|2	2|2	2|2	2|2	2|2	2|2	2|2	2|2	3|3	2|2	2|2	1|1	2|2	2|2	2|2	2|2	2|2	2|2	2|2	1|1	2|2	2|2	1|1	1|1	1|1	Y
Cluster26	1|1	1|1	1|1	1|1	0|0	0|0	0|0	1|1	1|1	0|0	0|0	0|0	0|0	0|0	0|0	0|0	1|1	1|1	1|1	1|1	1|1	1|1	0|0	0|0	0|0	1|1	1|1	0|0	1|1	0|0	0|0	0|0	0|0	0|0	0|0	0|0	1|1	1|1	1|1	2|2	1|1	1|1	0|0	0|0	0|0	N
Cluster27	1|1	1|1	0|0	1|1	0|0	0|0	0|0	1|1	1|1	0|0	0|0	1|1	1|1	1|1	1|1	1|1	1|1	1|1	1|1	1|1	1|1	1|1	1|1	1|1	0|0	1|1	1|1	0|0	1|1	0|0	0|0	0|0	0|0	0|0	0|0	0|0	1|1	1|1	1|1	2|2	1|1	1|1	2|2	1|1	3|3	N
Cluster28	0|0	0|0	0|0	0|0	0|0	0|0	0|0	0|0	0|0	0|0	0|0	0|0	0|0	0|0	0|0	0|0	0|0	0|0	0|0	0|0	0|0	0|0	0|0	0|0	0|0	0|0	0|0	0|0	0|0	0|0	0|0	0|0	0|0	0|0	0|0	0|0	0|0	0|0	0|0	0|0	0|0	0|0	0|0	2|2	1|1	N
Cluster29	2|2	2|2	1|1	2|2	1|1	1|1	1|1	2|2	2|2	1|1	1|1	1|1	1|1	1|1	1|1	1|1	2|2	2|2	2|2	2|2	2|2	2|2	1|1	2|2	1|1	2|2	2|2	1|1	2|2	1|1	1|1	1|1	1|1	0|0	1|1	1|1	2|2	2|2	2|2	2|2	2|2	2|2	1|1	1|1	1|1	Y
Cluster30	1|1	1|1	1|1	1|1	1|1	1|1	1|1	1|1	1|1	1|1	1|1	1|1	1|1	1|1	1|1	1|1	1|1	1|1	1|1	1|1	1|1	1|1	1|1	1|1	1|1	1|1	1|1	1|1	2|2	1|1	1|1	1|1	1|1	1|1	1|1	1|1	1|1	1|1	1|1	1|1	1|1	1|1	0|0	0|0	0|0	Y
Cluster31	1|1	1|1	1|1	1|1	1|1	1|1	1|1	1|1	1|1	1|1	1|1	1|1	1|1	1|1	1|1	1|1	1|1	1|1	1|1	1|1	1|1	1|1	1|1	1|1	1|1	1|1	1|1	1|1	2|2	1|1	1|1	1|1	1|1	1|1	1|1	1|1	1|1	1|1	1|1	2|2	1|1	1|1	0|0	0|0	0|0	Y
Cluster32	0|0	0|0	0|0	0|0	0|0	0|0	0|0	0|0	0|0	0|0	0|0	0|0	0|0	0|0	0|0	0|0	0|0	0|0	0|0	0|0	0|0	0|0	0|0	0|0	0|0	0|0	0|0	0|0	0|0	0|0	0|0	0|0	0|0	0|0	0|0	0|0	0|0	0|0	0|0	1|1	0|0	0|0	0|0	0|0	0|0	N
Cluster33	2|2	2|2	1|1	2|2	1|1	2|2	2|2	2|2	2|2	2|2	2|2	1|1	1|1	1|1	1|1	1|1	2|2	1|1	1|1	3|3	2|2	2|2	1|1	1|1	1|1	2|2	2|2	2|2	1|1	1|1	1|1	0|0	1|1	1|1	1|1	1|1	2|2	2|2	2|2	1|1	2|2	2|2	0|0	0|0	0|0	Y
Cluster34	0|0	0|0	0|0	0|0	0|0	0|0	0|0	0|0	0|0	0|0	0|0	0|0	0|0	0|0	0|0	0|0	0|0	0|0	0|0	0|0	0|0	0|0	0|0	0|0	0|0	0|0	0|0	0|0	0|0	0|0	0|0	0|0	0|0	0|0	0|0	0|0	0|0	0|0	0|0	0|0	0|0	0|0	1|1	2|2	1|1	N
Cluster35	0|0	0|0	0|0	0|0	0|0	0|0	0|0	0|0	0|0	0|0	0|0	0|0	0|0	0|0	0|0	0|0	0|0	0|0	0|0	0|0	0|0	0|0	0|0	0|0	0|0	0|0	0|0	0|0	0|0	0|0	0|0	0|0	0|0	0|0	0|0	0|0	0|0	0|0	0|0	0|0	0|0	0|0	1|1	2|2	1|1	N
Cluster36	1|1	1|1	1|1	1|1	1|1	1|1	1|1	1|1	1|1	1|1	1|1	1|1	1|1	1|1	1|1	1|1	1|1	1|1	1|1	1|1	1|1	1|1	1|1	1|1	1|1	1|1	1|1	1|1	2|2	1|1	1|1	1|1	1|1	1|1	1|1	1|1	1|1	1|1	1|1	3|3	1|1	1|1	0|0	0|0	0|0	Y
Cluster37	0|0	0|0	0|0	0|0	0|0	0|0	0|0	0|0	0|0	0|0	0|0	0|0	0|0	0|0	0|0	0|0	0|0	0|0	0|0	0|0	0|0	0|0	0|0	0|0	0|0	0|0	0|0	0|0	0|0	0|0	0|0	0|0	0|0	0|0	0|0	0|0	0|0	0|0	0|0	0|0	0|0	0|0	2|2	1|1	1|1	N
Cluster38	0|0	0|0	0|0	0|0	0|0	0|0	0|0	0|0	0|0	0|0	0|0	0|0	0|0	0|0	0|0	0|0	0|0	0|0	0|0	0|0	0|0	0|0	0|0	0|0	0|0	0|0	0|0	0|0	0|0	0|0	0|0	0|0	0|0	0|0	0|0	0|0	0|0	0|0	0|0	0|0	0|0	0|0	1|1	1|1	2|2	N
Cluster39	0|0	0|0	0|0	0|0	0|0	0|0	0|0	0|0	0|0	0|0	0|0	0|0	0|0	0|0	0|0	0|0	0|0	0|0	0|0	0|0	0|0	0|0	0|0	0|0	0|0	0|0	0|0	0|0	0|0	0|0	0|0	2|2	0|0	0|0	0|0	0|0	0|0	0|0	0|0	0|0	0|0	0|0	0|0	0|0	0|0	N
Cluster40	0|0	0|0	0|0	0|0	0|0	0|0	0|0	0|0	0|0	0|0	0|0	0|0	0|0	0|0	0|0	0|0	0|0	0|0	0|0	0|0	0|0	0|0	0|0	0|0	0|0	0|0	0|0	0|0	0|0	0|0	0|0	0|0	0|0	0|0	0|0	0|0	0|0	0|0	0|0	0|0	0|0	0|0	1|1	3|3	1|1	N
Cluster41	0|0	0|0	0|0	0|0	0|0	0|0	0|0	0|0	0|0	0|0	0|0	0|0	0|0	0|0	0|0	0|0	0|0	0|0	0|0	0|0	0|0	0|0	0|0	0|0	0|0	0|0	0|0	0|0	0|0	0|0	0|0	0|0	0|0	0|0	0|0	0|0	0|0	0|0	0|0	2|2	0|0	0|0	0|0	0|0	0|0	N
Cluster42	0|0	0|0	0|0	0|0	0|0	0|0	0|0	0|0	0|0	0|0	0|0	0|0	0|0	0|0	0|0	0|0	0|0	0|0	0|0	0|0	0|0	0|0	0|0	0|0	0|0	0|0	0|0	0|0	0|0	0|0	0|0	0|0	0|0	0|0	0|0	0|0	0|0	0|0	0|0	0|0	0|0	0|0	1|1	0|0	0|0	N
Cluster43	0|0	1|1	0|0	1|1	0|0	0|0	0|0	1|1	1|1	0|0	0|0	1|1	1|1	1|1	1|1	1|1	1|1	0|0	0|0	0|0	0|0	1|1	1|1	1|1	0|0	0|0	0|0	0|0	1|1	1|1	1|1	1|1	1|1	1|1	1|1	1|1	1|1	1|1	1|1	2|2	1|1	1|1	1|1	1|1	0|0	N
Cluster44	0|0	0|0	0|0	0|0	0|0	0|0	0|0	0|0	0|0	0|0	0|0	0|0	0|0	0|0	1|1	0|0	0|0	1|1	1|1	0|0	0|0	0|0	0|0	0|0	0|0	0|0	0|0	0|0	1|1	0|0	0|0	0|0	0|0	0|0	0|0	0|0	0|0	0|0	0|0	0|0	0|0	0|0	0|0	0|0	0|0	N
Cluster45	1|1	1|1	2|2	1|1	0|0	0|0	0|0	1|1	1|1	0|0	0|0	1|1	1|1	1|1	1|1	1|1	1|1	1|1	1|1	1|1	1|1	1|1	1|1	1|1	0|0	1|1	1|1	0|0	1|1	0|0	0|0	1|1	1|1	0|0	0|0	0|0	1|1	1|1	1|1	1|1	1|1	1|1	1|1	2|2	0|0	N
Cluster46	1|1	1|1	1|1	1|1	1|1	1|1	1|1	1|1	1|1	1|1	1|1	1|1	1|1	1|1	1|1	1|1	1|1	1|1	1|1	1|1	1|1	1|1	1|1	1|1	1|1	1|1	1|1	1|1	2|2	1|1	1|1	1|1	1|1	1|1	1|1	1|1	1|1	1|1	1|1	2|2	1|1	1|1	0|0	0|0	0|0	Y
Cluster47	0|0	0|0	0|0	0|0	0|0	0|0	0|0	0|0	0|0	0|0	0|0	0|0	0|0	0|0	0|0	0|0	0|0	0|0	0|0	0|0	0|0	0|0	0|0	0|0	0|0	0|0	0|0	0|0	0|0	0|0	0|0	0|0	0|0	0|0	0|0	0|0	0|0	0|0	0|0	1|1	0|0	0|0	1|1	2|2	0|0	N
Cluster48	2|2	2|2	1|1	2|2	2|2	2|2	2|2	2|2	2|2	2|2	2|2	2|2	2|2	2|2	2|2	2|2	2|2	2|2	2|2	2|2	2|2	2|2	3|3	2|2	2|2	2|2	2|2	2|2	2|2	2|2	2|2	2|2	2|2	2|2	2|2	2|2	2|2	2|2	2|2	2|2	2|2	2|2	2|2	2|2	1|1	Y
Cluster49	1|1	0|0	1|1	0|0	1|1	1|1	1|1	0|0	0|0	1|1	1|1	0|0	0|0	0|0	0|0	0|0	0|0	1|1	1|1	0|0	1|1	0|0	0|0	0|0	1|1	1|1	0|0	1|1	1|1	0|0	0|0	0|0	0|0	0|0	0|0	0|0	0|0	0|0	0|0	0|0	0|0	0|0	0|0	0|0	0|0	N
Cluster50	0|0	0|0	0|0	0|0	0|0	0|0	0|0	0|0	0|0	0|0	0|0	0|0	0|0	0|0	0|0	0|0	0|0	0|0	0|0	0|0	0|0	0|0	0|0	0|0	0|0	0|0	0|0	0|0	0|0	0|0	0|0	0|0	0|0	0|0	0|0	0|0	0|0	0|0	0|0	0|0	0|0	0|0	0|0	0|0	2|2	N
Cluster51	2|2	2|2	2|2	2|2	1|1	1|1	1|1	2|2	2|2	2|2	1|1	1|1	1|1	1|1	1|1	1|1	2|2	2|2	2|2	2|2	2|2	2|2	1|1	1|1	1|1	2|2	2|2	1|1	3|3	1|1	1|1	0|0	0|0	1|1	1|1	1|1	2|2	2|2	2|2	2|2	2|2	2|2	1|1	1|1	0|0	Y
Cluster52	1|1	1|1	2|2	1|1	1|1	1|1	1|1	1|1	1|1	1|1	1|1	1|1	1|1	1|1	1|1	1|1	1|1	1|1	1|1	0|0	1|1	1|1	1|1	1|1	1|1	1|1	0|0	1|1	2|2	1|1	1|1	1|1	1|1	1|1	1|1	1|1	1|1	1|1	1|1	1|1	1|1	1|1	1|1	1|1	1|1	Y
Cluster53	0|0	0|0	0|0	0|0	0|0	0|0	0|0	0|0	0|0	0|0	0|0	0|0	0|0	0|0	0|0	0|0	0|0	0|0	0|0	0|0	0|0	0|0	0|0	0|0	0|0	0|0	0|0	0|0	0|0	0|0	0|0	0|0	0|0	0|0	0|0	0|0	0|0	0|0	0|0	0|0	0|0	0|0	0|0	0|0	2|2	N
Cluster54	0|0	0|0	0|0	0|0	0|0	0|0	0|0	0|0	0|0	0|0	0|0	0|0	0|0	0|0	0|0	0|0	0|0	0|0	0|0	0|0	0|0	0|0	0|0	0|0	0|0	0|0	0|0	0|0	0|0	0|0	0|0	0|0	0|0	0|0	0|0	0|0	0|0	0|0	0|0	0|0	0|0	0|0	0|0	0|0	2|2	N
Cluster55	1|1	1|1	1|1	1|1	1|1	1|1	1|1	1|1	1|1	1|1	1|1	1|1	1|1	1|1	1|1	1|1	1|1	1|1	1|1	1|1	1|1	1|1	1|1	1|1	1|1	1|1	1|1	1|1	2|2	1|1	1|1	1|1	1|1	1|1	1|1	1|1	1|1	1|1	1|1	2|2	1|1	1|1	1|1	1|1	1|1	Y
Cluster56	1|1	1|1	0|0	1|1	0|0	0|0	0|0	1|1	1|1	0|0	0|0	1|1	1|1	1|1	1|1	1|1	1|1	1|1	1|1	1|1	1|1	1|1	2|2	1|1	0|0	1|1	1|1	0|0	1|1	0|0	0|0	0|0	1|1	0|0	0|0	0|0	1|1	1|1	1|1	1|1	1|1	1|1	1|1	1|1	0|0	N
Cluster57	1|1	1|1	1|1	1|1	1|1	1|1	1|1	1|1	1|1	1|1	1|1	1|1	1|1	1|1	0|0	1|1	1|1	1|1	1|1	1|1	1|1	2|2	1|1	1|1	1|1	1|1	1|1	1|1	1|1	1|1	1|1	1|1	1|1	1|1	1|1	1|1	1|1	1|1	1|1	2|2	1|1	1|1	1|1	0|0	0|0	Y
Cluster58	0|0	0|0	1|1	0|0	0|0	0|0	0|0	0|0	0|0	0|0	0|0	0|0	0|0	0|0	0|0	0|0	0|0	0|0	0|0	0|0	0|0	0|0	0|0	0|0	0|0	0|0	0|0	0|0	0|0	0|0	0|0	0|0	0|0	0|0	0|0	0|0	0|0	0|0	0|0	0|0	0|0	0|0	1|1	0|0	0|0	N
Cluster59	0|0	0|0	0|0	0|0	0|0	0|0	0|0	0|0	0|0	0|0	0|0	0|0	0|0	0|0	0|0	0|0	0|0	0|0	0|0	0|0	0|0	0|0	0|0	0|0	0|0	0|0	0|0	0|0	0|0	0|0	0|0	0|0	0|0	0|0	0|0	0|0	0|0	0|0	0|0	0|0	0|0	0|0	0|0	0|0	2|2	N
Cluster60	0|0	0|0	0|0	0|0	0|0	0|0	0|0	0|0	0|0	0|0	0|0	0|0	0|0	0|0	0|0	0|0	0|0	0|0	0|0	0|0	0|0	0|0	0|0	0|0	0|0	0|0	0|0	0|0	0|0	0|0	0|0	0|0	0|0	0|0	0|0	0|0	0|0	0|0	0|0	0|0	0|0	0|0	0|0	0|0	2|2	N
Cluster61	0|0	0|0	0|0	0|0	0|0	0|0	0|0	0|0	0|0	0|0	0|0	1|1	1|1	1|1	0|0	1|1	0|0	0|0	0|0	0|0	0|0	0|0	0|0	1|1	0|0	0|0	0|0	0|0	0|0	1|1	0|0	0|0	0|0	0|0	0|0	0|0	0|0	0|0	0|0	0|0	0|0	0|0	0|0	1|1	0|0	N
Cluster62	0|0	0|0	0|0	0|0	0|0	0|0	0|0	0|0	0|0	0|0	0|0	0|0	0|0	0|0	0|0	0|0	0|0	0|0	0|0	0|0	0|0	0|0	0|0	0|0	0|0	0|0	0|0	0|0	0|0	0|0	0|0	0|0	0|0	0|0	0|0	0|0	0|0	0|0	0|0	0|0	0|0	0|0	0|0	0|0	2|2	N
Cluster63	0|0	0|0	0|0	0|0	0|0	0|0	0|0	0|0	0|0	0|0	0|0	0|0	0|0	0|0	0|0	0|0	0|0	0|0	0|0	0|0	0|0	0|0	0|0	0|0	0|0	0|0	0|0	0|0	0|0	0|0	0|0	0|0	0|0	0|0	0|0	0|0	0|0	0|0	0|0	0|0	0|0	0|0	1|1	1|1	2|2	N
Cluster64	1|1	1|1	1|1	1|1	1|1	1|1	1|1	1|1	1|1	1|1	1|1	1|1	1|1	1|1	1|1	1|1	1|1	1|1	1|1	1|1	1|1	1|1	1|1	1|1	1|1	1|1	1|1	1|1	2|2	0|0	1|1	1|1	1|1	1|1	1|1	1|1	1|1	1|1	1|1	0|0	1|1	1|1	0|0	0|0	0|0	Y
Cluster65	1|1	1|1	1|1	1|1	1|1	1|1	1|1	1|1	1|1	1|1	1|1	1|1	1|1	1|1	1|1	1|1	1|1	1|1	1|1	1|1	1|1	1|1	1|1	1|1	1|1	1|1	1|1	1|1	2|2	1|1	1|1	1|1	1|1	1|1	1|1	1|1	1|1	1|1	1|1	2|2	1|1	1|1	0|0	0|0	0|0	Y
Cluster66	0|0	0|0	0|0	0|0	0|0	0|0	0|0	0|0	0|0	0|0	0|0	0|0	0|0	0|0	0|0	0|0	0|0	0|0	0|0	0|0	0|0	0|0	0|0	0|0	0|0	0|0	0|0	0|0	0|0	0|0	0|0	0|0	0|0	0|0	0|0	0|0	0|0	0|0	0|0	1|1	0|0	0|0	0|0	0|0	0|0	N
Cluster67	0|0	0|0	0|0	0|0	0|0	0|0	0|0	0|0	0|0	0|0	0|0	0|0	0|0	0|0	0|0	0|0	0|0	0|0	0|0	0|0	0|0	0|0	0|0	0|0	0|0	0|0	0|0	0|0	0|0	0|0	0|0	0|0	0|0	0|0	0|0	0|0	0|0	0|0	0|0	0|0	0|0	0|0	0|0	0|0	2|2	N
Cluster68	0|0	0|0	0|0	0|0	0|0	0|0	0|0	0|0	0|0	0|0	0|0	0|0	0|0	0|0	0|0	0|0	0|0	0|0	0|0	0|0	0|0	0|0	0|0	0|0	0|0	0|0	0|0	0|0	0|0	0|0	1|1	0|0	1|1	1|1	1|1	0|0	0|0	0|0	0|0	0|0	0|0	0|0	0|0	0|0	1|1	N
Cluster69	1|1	1|1	1|1	1|1	1|1	1|1	1|1	1|1	1|1	1|1	1|1	1|1	1|1	1|1	1|1	1|1	1|1	1|1	1|1	1|1	1|1	1|1	1|1	1|1	1|1	1|1	1|1	1|1	1|1	1|1	1|1	1|1	1|1	1|1	1|1	1|1	1|1	1|1	1|1	2|2	1|1	1|1	1|1	1|1	1|1	Y
Cluster70	0|0	0|0	0|0	0|0	0|0	0|0	0|0	0|0	0|0	0|0	0|0	0|0	0|0	0|0	0|0	0|0	0|0	0|0	0|0	0|0	0|0	0|0	0|0	0|0	0|0	0|0	0|0	0|0	0|0	0|0	0|0	0|0	0|0	0|0	0|0	0|0	0|0	0|0	0|0	0|0	0|0	0|0	0|0	1|1	2|2	N
Cluster71	0|0	0|0	1|1	0|0	0|0	0|0	0|0	0|0	0|0	0|0	0|0	0|0	0|0	0|0	0|0	0|0	0|0	0|0	1|1	0|0	0|0	0|0	0|0	0|0	0|0	0|0	0|0	0|0	0|0	0|0	0|0	0|0	0|0	0|0	0|0	0|0	0|0	0|0	0|0	0|0	0|0	0|0	0|0	0|0	2|2	N
Cluster72	0|0	0|0	0|0	0|0	1|1	0|0	0|0	0|0	0|0	0|0	0|0	0|0	0|0	0|0	0|0	0|0	0|0	0|0	0|0	0|0	0|0	0|0	1|1	0|0	0|0	0|0	0|0	0|0	0|0	0|0	0|0	0|0	0|0	0|0	0|0	1|1	0|0	0|0	0|0	2|2	0|0	0|0	0|0	0|0	0|0	N
Cluster73	1|1	1|1	1|1	1|1	1|1	1|1	1|1	1|1	1|1	1|1	1|1	1|1	1|1	1|1	1|1	1|1	1|1	1|1	1|1	1|1	1|1	1|1	1|1	1|1	1|1	1|1	1|1	1|1	2|2	1|1	1|1	1|1	1|1	1|1	1|1	1|1	1|1	1|1	1|1	2|2	1|1	1|1	0|0	0|0	0|0	Y
Cluster74	0|0	0|0	0|0	0|0	0|0	0|0	0|0	0|0	0|0	0|0	0|0	0|0	0|0	0|0	0|0	0|0	0|0	0|0	0|0	0|0	0|0	0|0	0|0	0|0	0|0	0|0	0|0	0|0	0|0	0|0	0|0	0|0	0|0	0|0	0|0	0|0	0|0	0|0	0|0	0|0	0|0	0|0	1|1	1|1	2|2	N
Cluster75	0|0	0|0	0|0	0|0	0|0	0|0	0|0	0|0	0|0	0|0	0|0	0|0	0|0	0|0	0|0	0|0	0|0	0|0	0|0	0|0	0|0	0|0	0|0	0|0	0|0	0|0	0|0	0|0	0|0	0|0	0|0	0|0	0|0	0|0	0|0	0|0	0|0	0|0	0|0	0|0	0|0	0|0	0|0	0|0	2|2	N
Cluster76	2|2	2|2	1|1	2|2	2|2	2|2	2|2	2|2	2|2	2|2	2|2	2|2	2|2	2|2	2|2	2|2	2|2	2|2	2|2	2|2	2|2	2|2	2|2	2|2	2|2	2|2	2|2	2|2	3|3	2|2	2|2	2|2	2|2	2|2	2|2	2|2	2|2	2|2	2|2	1|1	2|2	2|2	2|2	2|2	0|0	Y
Cluster77	1|1	1|1	1|1	1|1	1|1	1|1	1|1	1|1	1|1	1|1	1|1	1|1	1|1	1|1	1|1	1|1	1|1	1|1	1|1	1|1	1|1	1|1	1|1	1|1	1|1	1|1	1|1	1|1	2|2	1|1	1|1	1|1	1|1	1|1	1|1	1|1	1|1	1|1	1|1	1|1	1|1	1|1	1|1	1|1	0|0	Y
Cluster78	1|1	1|1	1|1	1|1	1|1	1|1	1|1	1|1	1|1	1|1	1|1	0|0	0|0	0|0	0|0	0|0	1|1	1|1	1|1	1|1	1|1	2|2	1|1	1|1	1|1	1|1	1|1	1|1	1|1	1|1	1|1	1|1	1|1	1|1	1|1	1|1	1|1	1|1	1|1	2|2	1|1	1|1	1|1	1|1	0|0	Y
Cluster79	1|1	1|1	1|1	1|1	1|1	1|1	1|1	1|1	1|1	1|1	1|1	1|1	1|1	1|1	1|1	1|1	1|1	1|1	1|1	1|1	1|1	1|1	1|1	1|1	1|1	1|1	1|1	1|1	2|2	1|1	1|1	1|1	1|1	1|1	1|1	1|1	1|1	1|1	1|1	2|2	1|1	1|1	1|1	1|1	1|1	Y
Cluster80	1|1	1|1	1|1	1|1	1|1	1|1	1|1	1|1	1|1	1|1	1|1	1|1	1|1	1|1	1|1	1|1	1|1	1|1	1|1	1|1	1|1	1|1	1|1	1|1	1|1	1|1	1|1	1|1	2|2	1|1	1|1	1|1	1|1	1|1	1|1	1|1	1|1	1|1	1|1	2|2	1|1	1|1	1|1	1|1	1|1	Y
Cluster81	0|0	0|0	0|0	0|0	0|0	0|0	0|0	0|0	0|0	0|0	0|0	1|1	1|1	1|1	1|1	1|1	0|0	0|0	0|0	0|0	0|0	0|0	0|0	1|1	0|0	0|0	0|0	0|0	0|0	0|0	0|0	0|0	0|0	0|0	0|0	0|0	0|0	0|0	0|0	0|0	0|0	0|0	0|0	0|0	0|0	N
Cluster82	1|1	1|1	1|1	1|1	1|1	1|1	1|1	1|1	1|1	1|1	1|1	1|1	1|1	1|1	1|1	1|1	1|1	1|1	1|1	1|1	1|1	1|1	1|1	1|1	1|1	1|1	1|1	1|1	1|1	1|1	1|1	1|1	1|1	1|1	1|1	1|1	1|1	1|1	1|1	2|2	1|1	1|1	1|1	1|1	1|1	Y
Cluster83	1|1	0|0	0|0	0|0	0|0	0|0	0|0	0|0	0|0	0|0	0|0	0|0	0|0	0|0	0|0	0|0	0|0	1|1	1|1	1|1	1|1	0|0	0|0	0|0	0|0	0|0	1|1	0|0	2|2	0|0	1|1	0|0	0|0	1|1	0|0	0|0	0|0	0|0	0|0	0|0	0|0	0|0	0|0	0|0	0|0	N
Cluster84	0|0	1|1	0|2	2|2	1|1	1|1	1|1	1|1	1|1	1|1	1|1	2|2	2|2	2|2	2|2	2|2	1|1	1|1	1|1	1|1	1|1	1|1	1|1	1|1	1|1	1|1	1|1	1|1	1|1	1|1	0|0	1|1	0|0	1|1	1|1	0|0	1|1	1|1	1|1	2|2	1|1	1|1	1|1	0|0	0|0	Y
Cluster85	0|0	0|0	0|0	0|0	0|0	0|0	0|0	0|0	0|0	0|0	0|0	0|0	0|0	0|0	0|0	0|0	0|0	0|0	0|0	0|0	0|0	0|0	2|2	0|0	0|0	0|0	0|0	0|0	0|0	0|0	0|0	0|0	1|1	0|0	0|0	0|0	0|0	0|0	0|0	0|0	0|0	0|0	0|0	0|0	0|0	N
Cluster86	1|1	1|1	1|1	1|1	1|1	1|1	1|1	1|1	1|1	1|1	1|1	1|1	1|1	1|1	1|1	1|1	1|1	1|1	1|1	1|1	1|1	1|1	1|1	1|1	1|1	1|1	1|1	1|1	2|2	1|1	1|1	1|1	1|1	1|1	1|1	1|1	1|1	1|1	1|1	1|1	1|1	1|1	0|0	0|0	0|0	Y
Cluster87	1|1	1|1	1|1	1|1	1|1	1|1	1|1	1|1	1|1	1|1	1|1	1|1	1|1	1|1	1|1	1|1	1|1	1|1	1|1	1|1	1|1	1|1	0|0	2|2	1|1	1|1	1|1	1|1	1|1	1|1	1|1	1|1	0|0	1|1	1|1	1|1	1|1	1|1	1|1	3|3	1|1	1|1	1|1	1|1	1|1	Y
Cluster88	0|0	0|0	0|0	0|0	0|0	0|0	0|0	0|0	0|0	0|0	0|0	1|1	1|1	1|1	1|1	1|1	0|0	0|0	0|0	0|0	0|0	0|0	0|0	1|1	0|0	0|0	0|0	0|0	0|0	0|0	0|0	0|0	0|0	0|0	0|0	0|0	0|0	0|0	0|0	0|0	0|0	0|0	0|0	0|0	0|0	N
Cluster89	0|0	0|0	0|0	0|0	0|0	0|0	0|0	0|0	0|0	0|0	0|0	0|0	0|0	0|0	0|0	0|0	0|0	0|0	0|0	0|0	0|0	0|0	0|0	0|0	0|0	0|0	0|0	0|0	0|0	0|0	0|0	0|0	0|0	0|0	0|0	0|0	0|0	0|0	0|0	0|0	0|0	0|0	0|0	2|2	0|0	N
Cluster90	0|0	0|0	0|0	0|0	0|0	0|0	0|0	0|0	0|0	0|0	0|0	0|0	0|0	0|0	0|0	0|0	0|0	0|0	0|0	0|0	0|0	0|0	1|1	0|0	0|0	0|0	0|0	0|0	0|0	0|0	0|0	0|0	0|0	0|0	0|0	0|0	0|0	0|0	0|0	0|0	0|0	0|0	0|0	0|0	1|1	N
Cluster91	0|0	1|1	1|1	1|1	1|1	1|1	1|1	1|1	1|1	1|1	1|1	0|0	0|0	0|0	0|0	0|0	1|1	1|1	1|1	0|0	1|1	1|1	1|1	1|1	1|1	1|1	0|0	1|1	1|1	1|1	1|1	1|1	1|1	0|0	1|1	0|0	1|1	1|1	1|1	0|0	1|1	1|1	0|0	0|0	0|0	N
Cluster92	0|0	0|0	0|0	0|0	0|0	0|0	0|0	0|0	0|0	0|0	0|0	0|0	0|0	0|0	0|0	0|0	0|0	0|0	0|0	0|0	0|0	0|0	0|0	0|0	0|0	2|2	0|0	0|0	0|0	0|0	0|0	0|0	0|0	0|0	0|0	0|0	0|0	0|0	0|0	0|0	0|0	0|0	0|0	0|0	0|0	N
Cluster93	1|1	1|1	2|2	1|1	1|1	2|2	1|1	1|1	1|1	1|1	1|1	0|0	0|0	0|0	0|0	0|0	0|0	1|1	1|1	1|1	0|0	1|1	1|1	0|0	1|1	1|1	1|1	1|1	1|1	1|1	2|2	0|0	0|0	0|0	2|2	1|1	1|1	1|1	1|1	1|1	1|1	1|1	0|0	0|0	0|0	N
Cluster94	0|0	0|0	0|0	0|0	0|0	0|0	0|0	0|0	0|0	0|0	0|0	0|0	0|0	0|0	0|0	0|0	0|0	0|0	0|0	0|0	0|0	0|0	0|0	0|0	0|0	0|0	0|0	0|0	0|0	0|0	0|0	0|0	0|0	0|0	0|0	0|0	0|0	0|0	0|0	0|0	0|0	0|0	1|1	0|0	2|2	N
Cluster95	0|0	0|0	0|0	0|0	0|0	0|0	0|0	0|0	0|0	0|0	0|0	0|0	0|0	0|0	0|0	0|0	0|0	0|0	0|0	0|0	0|0	0|0	0|0	0|0	0|0	0|0	0|0	0|0	0|0	0|0	0|0	0|0	0|0	0|0	0|0	0|0	0|0	0|0	0|0	0|0	0|0	0|0	1|1	0|0	2|2	N
Cluster96	0|0	0|0	0|0	0|0	0|0	0|0	0|0	0|0	0|0	0|0	0|0	5|5	4|4	4|4	4|4	4|4	0|0	0|0	0|0	0|0	0|0	0|0	1|1	0|0	0|0	0|0	0|0	0|0	0|0	0|0	0|0	0|0	1|1	0|0	0|0	0|0	0|0	0|0	0|0	0|0	0|0	0|0	0|0	0|0	0|0	N
Cluster97	0|0	0|0	0|0	0|0	0|0	0|0	0|0	0|0	0|0	0|0	0|0	0|0	0|0	0|0	0|0	0|0	0|0	0|0	0|0	0|0	0|0	0|0	0|0	0|0	0|0	0|0	0|0	0|0	0|0	0|0	0|0	0|0	0|0	0|0	0|0	0|0	0|0	0|0	0|0	0|0	0|0	0|0	1|1	2|2	0|0	N
Cluster98	1|1	1|1	1|1	1|1	1|1	1|1	1|1	1|1	1|1	1|1	1|1	1|1	1|1	1|1	1|1	1|1	2|2	1|1	1|1	1|1	1|1	1|1	1|1	1|1	1|1	1|1	1|1	1|1	1|1	0|0	1|1	0|0	0|0	0|0	0|0	1|1	1|1	1|1	1|1	1|1	1|1	1|1	0|0	0|0	0|0	Y
Cluster99	0|0	0|0	0|0	0|0	0|0	0|0	0|0	0|0	0|0	0|0	0|0	0|0	0|0	0|0	0|0	0|0	0|0	0|0	0|0	0|0	0|0	0|0	0|0	0|0	0|0	0|0	0|0	0|0	0|0	0|0	0|0	0|0	1|1	0|0	0|0	0|0	0|0	0|0	0|0	0|0	0|0	0|0	0|0	0|0	0|0	N
Cluster100	1|1	1|1	1|1	1|1	0|0	0|0	0|0	1|1	1|1	0|0	0|0	1|1	1|1	1|1	1|1	1|1	1|1	1|1	1|1	1|1	1|1	1|1	1|1	1|1	0|0	1|1	1|1	0|0	1|1	0|0	0|0	0|0	0|0	0|0	0|0	0|0	1|1	1|1	1|1	0|0	1|1	1|1	3|3	2|2	2|2	N
Cluster101	1|1	1|1	1|1	1|1	1|1	1|1	1|1	1|1	1|1	1|1	1|1	0|0	0|0	0|0	0|0	0|0	2|2	1|1	1|1	0|0	1|1	1|1	0|0	0|0	1|1	1|1	0|0	1|1	2|2	1|1	2|2	0|0	0|0	1|1	2|2	1|1	1|1	1|1	1|1	1|1	1|1	1|1	2|2	1|1	2|2	N
Cluster102	0|0	0|0	0|0	0|0	0|0	0|0	0|0	0|0	0|0	0|0	0|0	0|0	0|0	0|0	0|0	0|0	0|0	0|0	0|0	0|0	0|0	0|0	0|0	0|0	0|0	0|0	0|0	0|0	0|0	0|0	0|0	0|0	0|0	0|0	0|0	0|0	0|0	0|0	0|0	2|2	0|0	0|0	0|0	0|0	0|0	N
Cluster103	0|0	0|0	0|0	0|0	0|0	0|0	0|0	0|0	0|0	0|0	0|0	0|0	0|0	0|0	0|0	0|0	0|0	0|0	0|0	0|0	0|0	0|0	0|0	0|0	0|0	0|0	0|0	0|0	0|0	0|0	0|0	0|0	0|0	0|0	0|0	0|0	0|0	0|0	0|0	0|0	0|0	0|0	1|1	1|1	2|2	N
Cluster104	0|0	0|0	0|0	0|0	0|0	0|0	0|0	0|0	0|0	0|0	0|0	0|0	0|0	0|0	0|0	0|0	0|0	0|0	0|0	0|0	0|0	0|0	0|0	0|0	0|0	0|0	0|0	0|0	0|0	0|0	0|0	0|0	0|0	0|0	0|0	0|0	0|0	0|0	0|0	0|0	0|0	0|0	1|1	2|2	0|0	N
Cluster105	0|0	1|1	1|1	1|1	0|0	0|0	0|0	1|1	1|1	0|0	0|0	0|0	0|0	0|0	0|0	0|0	1|1	0|0	0|0	0|0	0|0	1|1	0|0	0|0	0|0	0|0	0|0	0|0	0|0	0|0	0|0	0|0	0|0	0|0	0|0	0|0	1|1	1|1	1|1	1|1	1|1	1|1	2|2	0|0	0|0	N
Cluster106	1|1	2|2	3|4	2|2	1|1	1|1	1|1	1|1	2|2	1|1	1|1	1|1	1|1	1|1	1|1	1|1	2|2	1|1	2|2	1|1	1|1	2|2	0|0	1|1	1|1	1|1	1|1	0|0	2|2	0|1	1|1	0|0	0|0	1|1	1|1	1|1	2|2	2|2	3|3	4|4	2|2	3|3	1|1	1|1	0|0	Y
Cluster107	1|1	1|1	2|3	1|1	0|0	0|0	1|1	1|1	1|1	0|0	0|0	1|1	1|1	1|1	1|1	1|1	0|0	1|1	2|2	1|1	1|1	1|1	2|2	1|1	0|0	1|1	1|1	0|0	1|1	0|0	0|0	1|1	2|2	0|0	0|0	0|0	1|1	1|1	1|1	1|1	1|1	1|1	0|0	0|0	0|0	N
Cluster108	0|0	0|0	0|0	0|0	0|0	0|0	0|0	0|0	0|0	0|0	0|0	0|0	0|0	0|0	0|0	0|0	0|0	0|0	0|0	0|0	0|0	0|0	0|0	0|0	0|0	0|0	0|0	0|0	0|0	0|0	0|0	0|0	0|0	0|0	0|0	0|0	0|0	0|0	0|0	0|0	0|0	0|0	1|1	1|1	2|2	N
Cluster109	0|0	0|0	0|0	0|0	0|0	0|0	0|0	0|0	0|0	0|0	0|0	0|0	0|0	0|0	0|0	0|0	0|0	0|0	1|1	0|0	0|0	0|0	0|0	0|0	0|0	0|0	0|0	0|0	0|0	0|0	0|0	0|0	0|0	0|0	0|0	0|0	0|0	0|0	0|0	0|0	0|0	0|0	1|1	2|2	1|1	N
Cluster110	1|1	1|1	1|1	1|1	1|1	1|1	1|1	1|1	1|1	1|1	1|1	1|1	1|1	1|1	1|1	1|1	1|1	1|1	1|1	1|1	1|1	1|1	1|1	1|1	1|1	1|1	1|1	1|1	2|2	1|1	1|1	1|1	1|1	1|1	1|1	1|1	1|1	1|1	1|1	1|1	1|1	1|1	1|1	1|1	1|1	Y
Cluster111	0|0	0|0	0|0	0|0	0|0	0|0	0|0	0|0	0|0	0|0	0|0	0|0	0|0	0|0	0|0	0|0	0|0	0|0	0|0	0|0	0|0	0|0	0|0	0|0	0|0	0|0	0|0	0|0	0|0	0|0	0|0	0|0	0|0	0|0	0|0	0|0	0|0	0|0	0|0	0|0	0|0	0|0	1|1	1|1	2|2	N
Cluster112	0|0	0|0	0|0	0|0	0|0	0|0	0|0	0|0	0|0	0|0	0|0	0|0	0|0	0|0	0|0	0|0	0|0	0|0	0|0	0|0	0|0	0|0	2|2	0|0	0|0	0|0	0|0	0|0	0|0	0|0	0|0	0|0	0|0	0|0	0|0	0|0	0|0	0|0	0|0	0|0	0|0	0|0	0|0	0|0	0|0	N
Cluster113	1|1	1|1	3|3	1|1	1|1	1|1	1|1	1|1	1|1	1|1	1|1	1|1	1|1	1|1	1|1	1|1	1|1	1|1	2|2	0|0	1|1	1|1	1|1	1|1	1|1	1|1	0|0	1|1	2|2	1|1	1|1	1|1	1|1	1|1	1|1	1|1	1|1	1|1	1|1	2|2	1|1	1|1	0|0	0|0	0|0	Y
Cluster114	0|0	0|0	0|0	0|0	0|0	0|0	0|0	0|0	0|0	0|0	0|0	0|0	0|0	0|0	0|0	0|0	0|0	0|0	1|1	0|0	0|0	0|0	0|0	0|0	0|0	0|0	0|0	0|0	0|0	0|0	0|0	0|0	0|0	0|0	0|0	0|0	0|0	0|0	0|0	0|0	0|0	0|0	0|0	2|2	0|0	N
Cluster115	1|1	1|1	1|1	1|1	1|1	1|1	1|1	1|1	1|1	1|1	1|1	1|1	1|1	1|1	1|1	1|1	1|1	1|1	1|1	0|0	1|1	1|1	1|1	1|1	1|1	1|1	0|0	1|1	2|2	1|1	1|1	1|1	0|0	1|1	1|1	1|1	1|1	1|1	1|1	1|1	1|1	1|1	0|0	0|0	0|0	Y
Cluster116	0|0	0|0	0|0	0|0	0|0	0|0	0|0	0|0	0|0	0|0	0|0	0|0	0|0	0|0	0|0	0|0	0|0	0|0	0|0	0|0	0|0	0|0	2|2	0|0	0|0	0|0	0|0	0|0	0|0	0|0	0|0	0|0	0|0	0|0	0|0	0|0	0|0	0|0	0|0	0|0	0|0	0|0	0|0	0|0	0|0	N
Cluster117	0|0	0|0	0|0	0|0	0|0	0|0	0|0	0|0	0|0	0|0	0|0	0|0	0|0	0|0	0|0	0|0	0|0	0|0	0|0	0|0	0|0	0|0	1|1	0|0	0|0	0|0	0|0	0|0	0|0	0|0	0|0	0|0	0|0	0|0	0|0	0|0	0|0	0|0	0|0	0|0	0|0	0|0	0|0	0|0	0|0	N
Cluster118	0|0	0|0	0|0	0|0	0|0	0|0	0|0	0|0	0|0	0|0	0|0	0|0	0|0	0|0	0|0	0|0	0|0	0|0	0|0	0|0	0|0	0|0	0|0	0|0	0|0	0|0	0|0	0|0	0|0	0|0	0|0	0|0	0|0	0|0	0|0	0|0	0|0	0|0	0|0	0|0	0|0	0|0	1|1	2|2	0|0	N
Cluster119	0|0	0|0	0|0	0|0	0|0	0|0	0|0	0|0	0|0	0|0	0|0	0|0	0|0	0|0	0|0	0|0	0|0	0|0	0|0	0|0	0|0	0|0	0|0	0|0	0|0	0|0	0|0	0|0	0|0	0|0	0|0	0|0	0|0	0|0	0|0	0|0	0|0	0|0	0|0	0|0	0|0	0|0	0|0	2|2	0|0	N
Cluster120	1|1	1|1	1|1	1|1	1|1	1|1	1|1	1|1	1|1	1|1	1|1	1|1	1|1	1|1	1|1	1|1	1|1	1|1	1|1	1|1	1|1	1|1	1|1	1|1	1|1	1|1	1|1	1|1	2|2	1|1	1|1	1|1	1|1	1|1	1|1	1|1	1|1	1|1	1|1	4|4	1|1	1|1	0|0	0|0	0|0	Y
Cluster121	1|1	1|1	1|1	1|1	1|1	1|1	1|1	1|1	1|1	1|1	1|1	1|1	1|1	1|1	1|1	1|1	1|1	1|1	1|1	0|0	1|1	1|1	1|1	1|1	1|1	1|1	0|0	1|1	2|2	1|1	1|1	0|0	0|0	1|1	1|1	1|1	1|1	1|1	1|1	1|1	1|1	1|1	1|1	1|1	1|1	Y
Cluster122	1|1	1|1	2|2	1|1	1|1	1|1	1|1	1|1	1|1	1|1	1|1	1|1	1|1	1|1	0|0	1|1	1|1	1|1	1|1	0|0	1|1	1|1	1|1	2|2	1|1	1|1	0|0	1|1	2|2	1|1	1|1	1|1	0|1	1|1	1|1	1|1	1|1	1|1	1|1	1|1	1|1	1|1	0|0	0|0	1|1	Y
Cluster123	1|1	1|1	1|1	1|1	1|1	1|1	1|1	1|1	1|1	1|1	1|1	1|1	1|1	1|1	1|1	1|1	1|1	0|0	1|1	0|0	0|0	0|0	2|2	1|1	1|1	0|0	0|0	1|1	0|0	1|1	1|1	1|1	1|1	1|1	1|1	1|1	1|1	1|1	1|1	0|0	1|1	1|1	0|0	0|0	0|0	N
Cluster124	0|0	0|0	1|1	0|0	0|0	0|0	0|0	0|0	0|0	0|0	0|0	0|0	0|0	0|0	0|0	0|0	0|0	1|1	1|1	1|1	2|2	2|2	0|0	0|0	0|0	1|1	1|1	0|0	1|1	0|0	0|0	0|0	0|0	0|0	0|0	0|0	0|0	0|0	0|0	1|1	0|0	0|0	1|1	1|1	1|1	N
Cluster125	1|1	1|1	2|2	1|1	1|1	1|1	1|1	1|1	1|1	1|1	1|1	1|1	1|1	1|1	1|1	1|1	1|1	1|1	1|1	0|0	1|1	1|1	2|2	1|1	1|1	1|1	0|0	1|1	1|1	1|1	1|1	1|1	1|1	1|1	1|1	1|1	1|1	1|1	1|1	1|1	1|1	1|1	0|0	0|0	0|0	Y
Cluster126	0|0	0|0	0|0	0|0	0|0	0|0	0|0	0|0	0|0	0|0	0|0	0|0	0|0	0|0	0|0	0|0	0|0	0|0	0|0	0|0	0|0	0|0	0|0	0|0	0|0	0|0	0|0	0|0	0|0	0|0	0|0	0|0	0|0	0|0	0|0	0|0	0|0	0|0	0|0	0|0	0|0	0|0	1|1	2|2	1|1	N
Cluster127	0|0	0|0	0|0	0|0	0|0	0|0	0|0	0|0	0|0	0|0	0|0	1|1	1|1	1|1	1|1	1|1	0|0	0|0	0|0	0|0	0|0	0|0	1|1	1|1	0|0	0|0	0|0	0|0	0|0	0|0	0|0	0|0	0|0	0|0	0|0	0|0	0|0	0|0	0|0	0|0	0|0	0|0	2|2	2|2	2|2	N
Cluster128	1|1	1|1	1|1	1|1	1|1	1|1	1|1	1|1	1|1	1|1	1|1	1|1	1|1	1|1	1|1	1|1	1|1	1|1	1|1	1|1	1|1	1|1	1|1	1|1	1|1	1|1	1|1	1|1	2|2	1|1	1|1	1|1	1|1	1|1	1|1	1|1	1|1	1|1	1|1	1|1	1|1	1|1	1|1	1|1	0|0	Y
Cluster129	0|0	0|0	0|0	0|0	0|0	0|0	0|0	0|0	0|0	0|0	0|0	0|0	0|0	0|0	0|0	0|0	0|0	0|0	0|0	0|0	0|0	0|0	0|0	0|0	0|0	0|0	0|0	0|0	0|0	0|0	0|0	0|0	0|0	0|0	0|0	0|0	0|0	0|0	0|0	0|0	0|0	0|0	1|1	1|1	2|2	N
Cluster130	1|1	1|1	1|1	1|1	1|1	1|1	1|1	1|1	1|1	1|1	1|1	1|1	1|1	1|1	1|1	1|1	1|1	1|1	1|1	1|1	1|1	1|1	1|1	1|1	1|1	1|1	1|1	1|1	2|2	1|1	1|1	1|1	1|1	1|1	1|1	1|1	1|1	1|1	1|1	1|1	1|1	1|1	1|1	1|1	1|1	Y
Cluster131	1|1	1|1	1|1	1|1	1|1	1|1	1|1	1|1	1|1	1|1	1|1	1|1	1|1	1|1	1|1	1|1	1|1	1|1	1|1	1|1	1|1	1|1	1|1	1|1	1|1	1|1	1|1	1|1	2|2	0|0	1|1	1|1	1|1	1|1	1|1	1|1	1|1	1|1	1|1	1|1	1|1	1|1	0|0	0|0	0|0	Y
Cluster132	1|1	1|1	1|1	1|1	1|1	1|1	1|1	1|1	1|1	1|1	1|1	1|1	1|1	1|1	1|1	1|1	1|1	1|1	1|1	2|2	1|1	1|1	1|1	1|1	1|1	1|1	1|1	1|1	1|1	1|1	1|1	1|1	1|1	1|1	1|1	1|1	1|1	1|1	1|1	1|1	1|1	1|1	1|1	1|1	1|1	Y
Cluster133	0|0	0|0	0|0	0|0	0|0	0|0	0|0	0|0	0|0	0|0	0|0	0|0	0|0	0|0	0|0	0|0	0|0	0|0	0|0	0|0	0|0	0|0	0|0	0|0	0|0	0|0	0|0	0|0	0|0	0|0	0|0	0|0	0|0	0|0	0|0	0|0	0|0	0|0	0|0	0|0	0|0	0|0	1|1	1|1	2|2	N
Cluster134	1|1	1|1	1|1	1|1	1|1	1|1	1|1	1|1	1|1	1|1	1|1	1|1	1|1	1|1	1|1	1|1	1|1	1|1	1|1	1|1	1|1	1|1	1|1	1|1	1|1	1|1	1|1	1|1	2|2	1|1	1|1	1|1	1|1	1|1	1|1	1|1	1|1	1|1	1|1	1|1	1|1	1|1	0|0	0|0	0|0	Y
Cluster135	1|1	1|1	1|1	1|1	1|1	1|1	1|1	1|1	1|1	1|1	1|1	1|1	1|1	1|1	1|1	1|1	1|1	1|1	1|1	1|1	1|1	1|1	1|1	1|1	1|1	1|1	1|1	1|1	1|1	1|1	1|1	1|1	1|1	1|1	1|1	1|1	1|1	1|1	1|1	2|2	1|1	1|1	1|1	1|1	0|0	Y
Cluster136	1|1	2|2	2|2	2|2	1|1	1|1	1|1	1|1	1|1	2|2	1|1	1|1	1|1	1|1	1|1	1|1	2|2	2|2	2|2	1|1	2|2	2|2	2|2	1|1	1|1	1|1	1|1	1|1	2|2	1|1	1|1	1|1	1|1	1|1	1|1	1|1	2|2	2|2	2|2	2|2	2|2	2|2	0|0	0|0	0|0	Y
Cluster137	0|0	0|0	0|0	0|0	0|0	0|0	0|0	0|0	0|0	0|0	0|0	0|0	0|0	0|0	0|0	0|0	0|0	0|0	0|0	0|0	0|0	0|0	0|0	0|0	0|0	0|0	0|0	0|0	0|0	0|0	0|0	0|0	0|0	0|0	0|0	0|0	0|0	0|0	0|0	0|0	0|0	0|0	2|2	3|3	0|0	N
Cluster138	0|0	0|0	0|0	0|0	0|0	0|0	0|0	0|0	0|0	0|0	0|0	1|1	1|1	1|1	1|1	1|1	0|0	0|0	0|0	0|0	0|0	0|0	2|2	1|1	0|0	0|0	0|0	0|0	0|0	0|0	0|0	1|1	1|1	0|0	0|0	0|0	0|0	0|0	0|0	0|0	0|0	0|0	0|0	0|0	0|0	N
Cluster139	0|0	0|0	0|0	0|0	0|0	0|0	0|0	0|0	0|0	0|0	0|0	0|0	0|0	0|0	0|0	0|0	0|0	0|0	0|0	0|0	0|0	0|0	0|0	0|0	0|0	0|0	0|0	0|0	0|0	0|0	0|0	0|0	0|0	0|0	0|0	0|0	0|0	0|0	0|0	0|0	0|0	0|0	1|1	1|1	0|0	N
Cluster140	1|1	1|1	1|1	1|1	1|1	1|1	1|1	1|1	1|1	1|1	1|1	0|0	0|0	0|0	0|0	0|0	1|1	1|1	1|1	1|1	1|1	1|1	0|0	0|0	1|1	1|1	1|1	1|1	2|2	1|1	1|1	0|0	0|0	1|1	1|1	1|1	1|1	1|1	1|1	1|1	1|1	1|1	0|0	0|0	0|0	N
Cluster141	0|0	0|0	0|0	0|0	0|0	0|0	0|0	0|0	0|0	0|0	0|0	0|0	0|0	0|0	0|0	0|0	0|0	0|0	0|0	0|0	0|0	0|0	0|0	0|0	0|0	0|0	0|0	0|0	0|0	0|0	0|0	0|0	0|0	0|0	0|0	0|0	0|0	0|0	0|0	0|0	0|0	0|0	1|1	0|0	2|2	N
Cluster142	0|0	0|0	0|0	0|0	0|0	0|0	0|0	0|0	0|0	0|0	0|0	0|0	0|0	0|0	0|0	0|0	0|0	0|0	0|0	0|0	0|0	0|0	0|0	0|0	0|0	0|0	0|0	0|0	0|0	0|0	0|0	0|0	0|0	0|0	0|0	0|0	0|0	0|0	0|0	0|0	0|0	0|0	0|0	0|0	2|2	N
Cluster143	1|1	1|1	1|1	2|2	1|1	1|1	1|1	2|2	2|2	1|1	1|1	1|1	1|1	1|1	1|1	1|1	1|1	1|1	1|1	1|1	1|1	1|1	1|1	1|1	1|1	1|1	1|1	1|1	2|2	1|1	1|1	1|1	1|1	1|1	1|1	1|1	1|1	1|1	1|1	1|1	1|1	1|1	1|1	1|1	1|1	Y
Cluster144	1|1	1|1	1|1	1|1	1|1	1|1	1|1	1|1	1|1	1|1	1|1	1|1	1|1	1|1	1|1	1|1	1|1	1|1	1|1	1|1	1|1	1|1	1|1	1|1	1|1	1|1	1|1	1|1	2|2	1|1	1|1	1|1	1|1	1|1	1|1	1|1	1|1	1|1	1|1	0|0	1|1	1|1	1|1	1|1	1|1	Y
Cluster145	0|0	0|0	0|0	0|0	0|0	0|0	0|0	0|0	0|0	0|0	0|0	0|0	0|0	0|0	0|0	0|0	0|0	0|0	0|0	0|0	0|0	0|0	0|0	0|0	0|0	0|0	0|0	0|0	0|0	0|0	0|0	0|0	0|0	0|0	0|0	0|0	0|0	0|0	0|0	0|0	0|0	0|0	1|1	0|0	2|2	N
Cluster146	1|1	1|1	1|1	1|1	1|1	1|1	1|1	1|1	1|1	1|1	1|1	1|1	1|1	1|1	1|1	1|1	1|1	1|1	1|1	1|1	1|1	1|1	2|2	1|1	1|1	1|1	1|1	1|1	1|1	1|1	1|1	1|1	1|1	1|1	1|1	1|1	1|1	1|1	1|1	1|1	1|1	1|1	1|1	1|1	0|0	Y
Cluster147	0|0	0|0	0|0	0|0	0|0	0|0	0|0	0|0	0|0	0|0	0|0	0|0	0|0	0|0	0|0	0|0	0|0	0|0	0|0	0|0	0|0	0|0	0|0	0|0	0|0	0|0	0|0	0|0	0|0	0|0	0|0	0|0	0|0	0|0	0|0	0|0	0|0	0|0	0|0	0|0	0|0	0|0	1|1	1|1	2|2	N
Cluster148	1|1	1|1	1|1	1|1	1|1	1|1	1|1	1|1	1|1	1|1	1|1	1|1	1|1	1|1	1|1	1|1	1|1	1|1	1|1	2|2	1|1	1|1	1|1	1|1	1|1	1|1	1|1	1|1	1|1	1|1	1|1	1|1	1|1	1|1	1|1	1|1	1|1	1|1	1|1	1|1	1|1	1|1	1|1	1|1	1|1	Y
Cluster149	0|0	0|0	0|0	0|0	0|0	0|0	0|0	0|0	0|0	0|0	0|0	0|0	0|0	0|0	0|0	0|0	0|0	0|0	0|0	0|0	0|0	0|0	0|0	0|0	0|0	0|0	0|0	0|0	0|0	0|0	0|0	0|0	0|0	0|0	0|0	0|0	0|0	0|0	0|0	0|0	0|0	0|0	0|0	0|0	2|2	N
Cluster150	0|0	0|0	0|0	0|0	0|0	0|0	0|0	0|0	0|0	0|0	0|0	0|0	0|0	0|0	0|0	0|0	0|0	0|0	0|0	0|0	0|0	0|0	0|0	0|0	0|0	0|0	0|0	0|0	0|0	0|0	1|1	0|0	0|0	0|0	0|0	0|0	0|0	0|0	0|0	0|0	0|0	0|0	0|0	2|2	0|0	N
Cluster151	0|0	0|0	0|0	0|0	0|0	0|0	0|0	0|0	0|0	0|0	0|0	0|0	0|0	0|0	0|0	0|0	0|0	0|0	0|0	0|0	0|0	0|0	0|0	0|0	0|0	0|0	0|0	0|0	0|0	0|0	0|0	0|0	0|0	0|0	0|0	0|0	0|0	0|0	0|0	0|0	0|0	0|0	0|0	0|0	2|2	N
Cluster152	0|0	0|0	0|0	0|0	0|0	0|0	0|0	0|0	0|0	0|0	0|0	0|0	0|0	0|0	0|0	0|0	0|0	0|0	0|0	2|2	0|0	0|0	0|0	0|0	0|0	0|0	1|1	0|0	0|0	0|0	0|0	0|0	0|0	0|0	0|0	0|0	0|0	0|0	0|0	0|0	0|0	0|0	0|0	0|0	0|0	N
Cluster153	0|0	0|0	0|0	0|0	0|0	0|0	0|0	0|0	0|0	0|0	0|0	0|0	0|0	0|0	0|0	0|0	0|0	0|0	0|0	0|0	0|0	0|0	0|0	0|0	0|0	0|0	0|0	0|0	0|0	0|0	0|0	0|0	0|0	0|0	0|0	0|0	0|0	0|0	0|0	0|0	0|0	0|0	0|0	0|0	2|2	N
Cluster154	0|0	0|0	0|0	0|0	0|0	0|0	0|0	0|0	0|0	0|0	0|0	0|0	0|0	0|0	0|0	0|0	0|0	0|0	0|0	0|0	0|0	0|0	0|0	0|0	0|0	0|0	0|0	0|0	0|0	0|0	0|0	0|0	0|0	0|0	0|0	0|0	0|0	0|0	0|0	0|0	0|0	0|0	0|0	0|0	2|2	N
Cluster155	0|0	0|0	0|0	0|0	0|0	0|0	0|0	0|0	0|0	0|0	0|0	0|0	0|0	0|0	0|0	0|0	0|0	0|0	0|0	0|0	0|0	0|0	0|0	0|0	0|0	0|0	0|0	0|0	0|0	0|0	0|0	0|0	0|0	0|0	0|0	0|0	0|0	0|0	0|0	0|0	0|0	0|0	0|0	0|0	3|3	N
Cluster156	1|1	1|1	1|1	1|1	1|1	1|1	1|1	1|1	1|1	1|1	1|1	1|1	1|1	1|1	1|1	1|1	1|1	1|1	1|1	1|1	1|1	1|1	2|2	1|1	1|1	1|1	1|1	1|1	1|1	1|1	1|1	1|1	1|1	1|1	1|1	1|1	1|1	1|1	1|1	2|2	1|1	1|1	0|0	0|0	0|0	Y
Cluster157	1|1	1|1	1|1	1|1	1|1	1|1	1|1	1|1	1|1	1|1	1|1	1|1	1|1	1|1	1|1	1|1	1|1	1|1	1|1	1|1	1|1	1|1	1|1	1|1	0|0	1|1	1|1	1|1	2|2	1|1	1|1	1|1	1|1	1|1	1|1	1|1	1|1	1|1	1|1	2|2	1|1	1|1	1|1	1|1	1|1	Y
Cluster158	0|0	1|1	1|1	1|1	1|1	1|1	1|1	1|1	1|1	1|1	1|1	1|1	1|1	1|1	1|1	1|1	0|0	0|0	0|0	1|1	0|0	2|2	1|1	1|1	1|1	0|0	1|1	1|1	0|0	1|1	1|1	0|0	1|1	1|1	1|1	1|1	1|1	1|1	1|1	1|1	1|1	1|1	0|0	0|0	0|0	N
Cluster159	1|1	1|1	1|1	1|1	1|1	1|1	1|1	1|1	1|1	1|1	1|1	1|1	1|1	1|1	1|1	1|1	1|1	1|1	1|1	1|1	1|1	2|2	1|1	1|1	1|1	1|1	1|1	1|1	1|1	1|1	1|1	1|1	1|1	1|1	1|1	1|1	1|1	1|1	1|1	1|1	1|1	1|1	0|0	0|0	0|0	Y
Cluster160	0|0	0|0	0|0	0|0	0|0	0|0	0|0	0|0	0|0	0|0	0|0	0|0	0|0	0|0	0|0	0|0	0|0	0|0	0|0	0|0	0|0	0|0	0|0	0|0	0|0	0|0	0|0	0|0	0|0	0|0	0|0	0|0	0|0	0|0	0|0	0|0	0|0	0|0	0|0	0|0	0|0	0|0	0|0	2|2	0|0	N
Cluster161	0|0	0|0	0|0	0|0	0|0	0|0	0|0	0|0	0|0	0|0	0|0	0|0	0|0	0|0	0|0	0|0	0|0	0|0	0|0	0|0	0|0	0|0	0|0	0|0	0|0	0|0	0|0	0|0	0|0	0|0	0|0	0|0	0|0	0|0	0|0	0|0	0|0	0|0	0|0	1|1	0|0	0|0	0|0	0|0	0|0	N
Cluster162	1|1	1|1	2|2	1|1	0|0	0|0	0|0	1|1	1|1	0|0	0|0	1|1	1|1	1|1	1|1	1|1	1|1	1|1	1|1	1|1	1|1	1|1	2|2	1|1	0|0	1|1	1|1	0|0	1|1	0|0	0|0	0|0	1|1	0|0	0|0	0|0	1|1	1|1	1|1	1|1	1|1	1|1	1|1	1|1	0|0	N
Cluster163	1|1	1|1	0|1	1|1	1|1	1|1	1|1	1|1	1|1	1|1	1|1	0|0	0|0	0|0	0|0	0|0	1|1	1|1	1|1	1|1	1|1	2|2	0|0	0|0	1|1	1|1	1|1	1|1	1|1	1|1	0|0	0|0	0|0	1|1	1|1	1|1	1|1	1|1	1|1	1|1	1|1	1|1	0|0	0|0	0|0	N
Cluster164	0|0	0|0	0|0	0|0	0|0	0|0	0|0	0|0	0|0	0|0	0|0	0|0	0|0	0|0	0|0	0|0	0|0	0|0	0|0	0|0	0|0	0|0	0|0	0|0	0|0	0|0	0|0	0|0	0|0	0|0	0|0	0|0	0|0	0|0	0|0	0|0	0|0	0|0	0|0	0|0	0|0	0|0	0|0	0|0	2|2	N
Cluster165	0|0	0|0	0|0	0|0	0|0	0|0	0|0	0|0	0|0	0|0	0|0	0|0	0|0	0|0	0|0	0|0	0|0	0|0	0|0	0|0	0|0	0|0	0|0	0|0	0|0	0|0	0|0	0|0	0|0	0|0	0|0	0|0	0|0	0|0	0|0	0|0	0|0	0|0	0|0	0|0	0|0	0|0	1|1	1|1	2|2	N
Cluster166	0|0	0|0	0|0	0|0	0|0	0|0	0|0	0|0	0|0	0|0	0|0	0|0	0|0	0|0	0|0	0|0	0|0	0|0	0|0	0|0	0|0	0|0	0|0	0|0	0|0	0|0	0|0	0|0	0|0	0|0	0|0	0|0	0|0	0|0	0|0	0|0	0|0	0|0	0|0	0|0	0|0	0|0	1|1	1|1	2|2	N
Cluster167	0|0	0|0	0|0	0|0	0|0	0|0	0|0	0|0	0|0	0|0	0|0	0|0	0|0	0|0	0|0	0|0	0|0	0|0	0|0	0|0	0|0	0|0	0|0	0|0	0|0	0|0	0|0	0|0	0|0	0|0	0|0	0|0	0|0	0|0	0|0	0|0	0|0	0|0	0|0	0|0	0|0	0|0	1|1	2|2	0|0	N
Cluster168	0|0	3|3	3|4	3|3	3|3	1|1	2|2	2|2	2|2	1|1	1|1	4|4	4|4	2|2	4|4	4|4	1|1	3|3	3|3	2|2	3|3	3|3	3|3	3|3	1|1	3|3	3|3	1|1	2|2	0|0	1|1	1|1	1|1	1|1	1|1	0|0	3|3	3|3	3|3	3|3	2|2	3|3	0|0	1|1	0|0	Y
Cluster169	0|0	0|0	0|0	0|0	0|0	0|0	0|0	0|0	0|0	0|0	0|0	0|0	0|0	0|0	0|0	0|0	0|0	0|0	0|0	0|0	0|0	0|0	0|0	0|0	0|0	0|0	0|0	0|0	0|0	0|0	0|0	0|0	0|0	0|0	0|0	0|0	0|0	0|0	0|0	0|0	0|0	0|0	0|0	2|2	1|1	N
Cluster170	1|1	1|1	1|1	1|1	1|1	1|1	1|1	1|1	1|1	1|1	1|1	1|1	1|1	1|1	1|1	1|1	1|1	1|1	1|1	1|1	1|1	1|1	1|1	1|1	1|1	1|1	1|1	1|1	2|2	1|1	1|1	1|1	1|1	1|1	1|1	1|1	1|1	1|1	1|1	1|1	1|1	1|1	1|1	1|1	1|1	Y
Cluster171	1|1	1|1	0|1	1|1	1|1	1|1	1|1	1|1	1|1	1|1	1|1	1|1	1|1	1|1	1|1	1|1	0|0	1|1	1|1	1|1	1|1	1|1	2|2	1|1	1|1	1|1	1|1	1|1	1|1	1|1	1|1	0|1	0|0	1|1	1|1	1|1	1|1	1|1	1|1	1|1	1|1	1|1	0|0	0|0	0|0	Y
Cluster172	0|0	0|0	0|0	0|0	0|0	0|0	0|0	0|0	0|0	0|0	0|0	0|0	0|0	0|0	0|0	0|0	0|0	0|0	0|0	0|0	0|0	0|0	0|0	0|0	0|0	0|0	0|0	0|0	0|0	0|0	0|0	0|0	0|0	0|0	0|0	0|0	0|0	0|0	0|0	0|0	0|0	0|0	1|1	1|1	2|2	N
Cluster173	1|1	1|1	1|1	1|1	1|1	1|1	1|1	1|1	1|1	1|1	1|1	1|1	1|1	1|1	1|1	1|1	1|1	1|1	1|1	1|1	1|1	1|1	1|1	1|1	1|1	1|1	1|1	1|1	2|2	1|1	1|1	1|1	1|1	1|1	1|1	1|1	1|1	1|1	1|1	1|1	1|1	1|1	0|0	0|0	0|0	Y
Cluster174	0|0	0|0	0|0	0|0	0|0	0|0	0|0	0|0	0|0	0|0	0|0	1|1	1|1	1|1	1|1	1|1	0|0	0|0	0|0	0|0	0|0	0|0	1|1	1|1	0|0	0|0	0|0	0|0	0|0	0|0	0|0	1|1	1|1	0|0	0|0	0|0	0|0	0|0	0|0	0|0	0|0	0|0	1|1	1|1	1|1	N
Cluster175	1|1	1|1	1|1	1|1	1|1	1|1	1|1	1|1	1|1	1|1	1|1	1|1	1|1	1|1	1|1	1|1	1|1	1|1	1|1	1|1	1|1	1|1	1|1	1|1	1|1	1|1	1|1	1|1	2|2	1|1	0|0	1|1	1|1	1|1	1|1	1|1	1|1	1|1	1|1	1|1	1|1	1|1	1|1	1|1	1|1	Y
Cluster176	0|0	0|0	0|0	0|0	0|0	0|0	0|0	0|0	0|0	0|0	0|0	0|0	0|0	0|0	0|0	0|0	0|0	0|0	1|1	0|0	0|0	0|0	0|0	0|0	0|0	0|0	0|0	0|0	0|0	0|0	0|0	0|0	0|0	0|0	0|0	0|0	0|0	0|0	0|0	0|0	0|0	0|0	1|1	0|0	2|2	N
Cluster177	1|1	1|1	2|2	1|1	1|1	1|1	1|1	1|1	1|1	1|1	1|1	1|1	1|1	1|1	1|1	1|1	2|2	1|1	1|1	3|3	2|2	1|1	2|2	1|1	1|1	1|1	3|3	1|1	1|1	1|1	1|1	1|1	1|1	1|1	1|1	1|1	1|1	1|1	1|1	1|1	1|1	1|1	0|0	1|1	1|1	Y
Cluster178	0|0	0|0	0|0	0|0	0|0	0|0	0|0	0|0	0|0	0|0	0|0	0|0	0|0	0|0	0|0	0|0	0|0	0|0	0|0	0|0	0|0	0|0	0|0	0|0	0|0	0|0	0|0	0|0	0|0	0|0	0|0	0|0	0|0	0|0	0|0	0|0	0|0	0|0	0|0	0|0	0|0	0|0	0|0	2|2	0|0	N
Cluster179	1|1	1|1	0|1	1|1	0|1	0|1	0|1	1|1	1|1	0|1	0|1	1|1	1|1	1|1	1|1	1|1	1|1	1|1	1|1	1|1	1|1	1|1	1|1	1|1	0|1	1|1	1|1	0|1	2|2	1|1	1|1	1|1	1|1	1|1	1|1	1|1	1|1	1|1	1|1	2|2	1|1	1|1	1|1	1|1	1|1	Y
Cluster180	1|1	1|1	1|1	1|1	0|0	0|0	0|0	0|0	1|1	0|0	0|0	1|1	1|1	1|1	1|1	1|1	1|1	1|1	1|1	1|1	1|1	1|1	2|2	1|1	0|0	1|1	1|1	0|0	1|1	0|0	0|0	0|0	1|1	0|0	0|0	0|0	1|1	1|1	1|1	2|2	1|1	1|1	0|0	0|0	0|0	N
Cluster181	0|0	0|0	1|1	0|0	0|0	0|0	0|0	0|0	0|0	0|0	0|0	0|0	0|0	0|0	0|0	0|0	0|0	0|0	0|0	0|0	0|0	0|0	0|0	0|0	0|0	0|0	0|0	0|0	0|0	0|0	0|0	0|0	0|0	0|0	0|0	0|0	0|0	0|0	0|0	0|0	0|0	0|0	2|2	1|1	0|0	N
Cluster182	2|2	2|2	2|2	2|2	2|2	2|2	2|2	2|2	2|2	2|2	2|2	3|3	3|3	3|3	3|3	3|3	2|2	2|2	3|3	2|2	2|2	2|2	2|2	2|2	2|2	2|2	2|2	2|2	2|2	2|2	2|2	1|1	2|2	2|2	2|2	2|2	2|2	2|2	2|2	2|2	2|2	2|2	1|1	1|1	1|1	Y
Cluster183	1|1	1|1	1|1	1|1	1|1	1|1	1|1	1|1	1|1	1|1	1|1	1|1	1|1	1|1	1|1	1|1	1|1	1|1	1|1	1|1	1|1	1|1	1|1	1|1	1|1	1|1	1|1	1|1	2|2	1|1	1|1	1|1	1|1	1|1	1|1	1|1	1|1	1|1	1|1	1|1	1|1	1|1	1|1	1|1	1|1	Y
Cluster184	1|1	1|1	1|1	1|1	1|1	1|1	1|1	1|1	1|1	1|1	1|1	1|1	1|1	1|1	1|1	1|1	1|1	1|1	1|1	1|1	1|1	1|1	2|2	1|1	1|1	1|1	1|1	1|1	1|1	1|1	1|1	1|1	1|1	1|1	1|1	1|1	1|1	1|1	1|1	2|2	1|1	1|1	1|1	1|1	1|1	Y
Cluster185	1|1	1|1	1|1	1|1	1|1	1|1	1|1	1|1	1|1	1|1	1|1	1|1	1|1	1|1	1|1	1|1	1|1	1|1	1|1	1|1	1|1	1|1	1|1	1|1	1|1	1|1	1|1	1|1	2|2	1|1	1|1	1|1	1|1	1|1	1|1	1|1	1|1	1|1	1|1	1|1	1|1	1|1	0|0	0|0	0|0	Y
Cluster186	1|1	1|1	1|1	1|1	1|1	1|1	1|1	1|1	1|1	1|1	1|1	1|1	1|1	1|1	1|1	1|1	1|1	1|1	1|1	1|1	1|1	2|2	1|1	1|1	1|1	1|1	1|1	1|1	1|1	1|1	1|1	1|1	1|1	1|1	1|1	1|1	1|1	1|1	1|1	1|1	1|1	1|1	1|1	1|1	1|1	Y
Cluster187	1|1	1|1	1|1	1|1	0|1	0|1	0|1	1|1	1|1	0|1	0|1	0|0	0|0	0|0	0|0	0|0	1|1	1|1	1|1	1|1	1|1	1|1	0|0	1|1	0|1	1|1	1|1	0|1	2|2	0|1	1|1	1|1	0|0	0|1	1|1	1|1	1|1	1|1	1|1	1|1	1|1	1|1	0|1	1|1	0|1	N
Cluster188	0|0	0|0	0|0	0|0	0|0	0|0	0|0	0|0	0|0	0|0	0|0	1|1	1|1	1|1	1|1	1|1	0|0	0|0	0|0	0|0	0|0	0|0	2|2	1|1	0|0	0|0	0|0	0|0	0|0	0|0	0|0	1|1	0|1	0|0	0|0	0|0	0|0	0|0	0|0	0|0	0|0	0|0	0|0	0|0	0|0	N
Cluster189	0|0	0|0	0|0	0|0	0|0	0|0	0|0	0|0	0|0	0|0	0|0	0|0	0|0	0|0	0|0	0|0	0|0	0|0	0|0	0|0	0|0	0|0	0|0	0|0	0|0	0|0	0|0	0|0	0|0	0|0	0|0	0|0	0|0	0|0	0|0	0|0	0|0	0|0	0|0	0|0	0|0	0|0	0|0	0|0	2|2	N
Cluster190	1|1	1|1	1|1	1|1	1|1	1|1	1|1	1|1	1|1	1|1	1|1	1|1	1|1	1|1	1|1	1|1	1|1	1|1	1|1	1|1	1|1	1|1	1|1	1|1	1|1	1|1	1|1	1|1	2|2	1|1	1|1	1|1	1|1	1|1	1|1	1|1	1|1	1|1	1|1	1|1	1|1	1|1	0|0	1|1	0|0	Y
Cluster191	2|2	2|2	0|0	2|2	2|2	2|2	2|2	2|2	2|2	2|2	2|2	1|1	1|1	1|1	1|1	1|1	2|2	2|2	2|2	2|2	2|2	2|2	1|1	1|1	2|2	2|2	2|2	2|2	2|2	2|2	2|2	1|1	1|1	2|2	2|2	2|2	2|2	2|2	2|2	1|1	2|2	2|2	2|2	3|3	2|2	Y
Cluster192	0|0	0|0	0|0	0|0	0|0	0|0	0|0	0|0	0|0	0|0	0|0	1|1	1|1	1|1	1|1	1|1	0|0	0|0	0|0	0|0	0|0	0|0	2|2	0|0	0|0	0|0	0|0	0|0	0|0	0|0	0|0	0|0	1|1	0|0	0|0	0|0	0|0	0|0	0|0	0|0	0|0	0|0	0|0	0|0	0|0	N
Cluster193	0|0	0|0	1|1	0|0	0|0	0|0	0|0	0|0	0|0	0|0	0|0	2|2	1|1	1|1	1|1	1|1	0|0	0|0	0|0	0|0	0|0	0|0	1|1	1|1	0|0	0|0	0|0	0|0	0|0	0|0	0|0	0|0	1|1	0|0	0|0	0|0	0|0	0|0	0|0	1|1	0|0	0|0	0|0	0|0	0|0	N
Cluster194	0|0	0|0	0|0	0|0	0|0	0|0	0|0	0|0	0|0	0|0	0|0	0|0	0|0	0|0	0|0	0|0	0|0	0|0	0|0	0|0	0|0	0|0	0|0	0|0	0|0	0|0	0|0	0|0	0|0	0|0	0|0	0|0	0|0	0|0	0|0	0|0	0|0	0|0	0|0	0|0	0|0	0|0	1|1	1|1	2|2	N
Cluster195	2|2	2|2	1|1	2|2	2|2	2|2	2|2	2|2	2|2	2|2	2|2	2|2	2|2	2|2	2|2	2|2	2|2	2|2	2|2	2|2	2|2	2|2	2|2	2|2	0|0	2|2	2|2	2|2	3|3	2|2	2|2	1|1	2|2	2|2	2|2	2|2	2|2	2|2	2|2	2|2	2|2	2|2	2|2	2|2	2|2	Y
Cluster196	1|1	1|1	1|1	1|1	1|1	1|1	1|1	1|1	1|1	1|1	1|1	0|0	0|0	0|0	0|0	0|0	1|1	1|1	1|1	1|1	1|1	2|2	0|0	0|0	1|1	1|1	1|1	1|1	1|1	1|1	1|1	0|0	1|1	1|1	1|1	1|1	1|1	1|1	1|1	1|1	1|1	1|1	0|0	0|0	0|0	N
Cluster197	1|1	1|1	1|1	1|1	0|0	0|0	0|0	0|0	1|1	0|0	0|0	1|1	1|1	1|1	1|1	1|1	1|1	1|1	1|1	1|1	1|1	1|1	1|1	2|2	0|0	1|1	1|1	0|0	1|1	1|1	0|0	0|0	1|1	0|0	0|0	0|0	1|1	1|1	1|1	1|1	1|1	1|1	0|0	0|0	0|0	N
Cluster198	0|0	0|0	0|0	0|0	0|0	0|0	0|0	0|0	0|0	0|0	0|0	0|0	0|0	0|0	0|0	0|0	0|0	0|0	0|0	0|0	0|0	0|0	0|0	0|0	0|0	0|0	0|0	0|0	0|0	0|0	0|0	0|0	0|0	0|0	0|0	0|0	0|0	0|0	0|0	0|0	0|0	0|0	1|1	1|1	0|0	N
Cluster199	1|1	1|1	1|1	1|1	1|1	1|1	1|1	1|1	1|1	1|1	1|1	1|1	1|1	1|1	1|1	1|1	1|1	1|1	1|1	1|1	1|1	1|1	2|2	1|1	1|1	1|1	1|1	1|1	1|1	1|1	1|1	1|1	1|1	1|1	1|1	1|1	1|1	1|1	1|1	2|2	1|1	1|1	1|1	1|1	1|1	Y
Cluster200	1|1	1|1	1|1	1|1	1|1	1|1	1|1	1|1	1|1	1|1	1|1	1|1	1|1	1|1	1|1	1|1	1|1	1|1	1|1	1|1	1|1	1|1	1|1	1|1	1|1	1|1	1|1	1|1	2|2	0|0	1|1	1|1	1|1	1|1	1|1	1|1	1|1	1|1	1|1	1|1	1|1	1|1	1|1	1|1	1|1	Y
Cluster201	2|2	1|1	1|2	1|1	1|1	1|1	1|1	1|1	1|1	1|1	1|1	2|2	2|2	2|2	2|2	2|2	0|0	0|0	0|0	0|0	0|0	2|2	2|2	2|2	1|1	0|0	0|0	1|1	0|0	0|0	0|0	0|0	0|0	0|0	0|0	0|0	1|1	1|1	1|1	1|1	1|1	1|1	0|0	0|0	0|0	N
Cluster202	1|1	1|1	1|1	1|1	1|1	1|1	1|1	1|1	1|1	1|1	1|1	1|1	1|1	1|1	1|1	1|1	1|1	1|1	1|1	1|1	1|1	1|1	1|1	1|1	1|1	1|1	2|2	1|1	1|1	1|1	1|1	1|1	1|1	1|1	1|1	1|1	1|1	1|1	1|1	1|1	1|1	1|1	1|1	1|1	1|1	Y
Cluster203	0|0	0|0	0|0	0|0	0|0	0|0	0|0	0|0	0|0	0|0	0|0	0|0	0|0	0|0	0|0	0|0	0|0	0|0	0|0	0|0	0|0	0|0	0|0	0|0	0|0	0|0	0|0	0|0	0|0	0|0	0|0	0|0	0|0	0|0	0|0	0|0	0|0	0|0	0|0	0|0	0|0	0|0	1|1	1|1	2|2	N
Cluster204	1|1	1|1	1|1	1|1	1|1	1|1	1|1	1|1	1|1	1|1	1|1	1|1	1|1	1|1	1|1	1|1	1|1	1|1	1|1	1|1	1|1	1|1	1|1	1|1	1|1	1|1	1|1	1|1	2|2	1|1	1|1	1|1	1|1	1|1	1|1	1|1	1|1	1|1	1|1	1|1	1|1	1|1	1|1	1|1	1|1	Y
Cluster205	1|1	1|1	1|1	1|1	0|0	0|0	0|0	0|0	1|1	0|0	0|0	1|1	1|1	1|1	1|1	1|1	1|1	1|1	1|1	1|1	1|1	1|1	2|2	1|1	0|0	1|1	1|1	0|0	1|1	1|1	1|1	0|0	1|1	1|1	1|1	1|1	1|1	1|1	1|1	1|1	1|1	1|1	0|0	0|0	0|0	N
Cluster206	1|1	1|1	1|1	1|1	1|1	1|1	1|1	1|1	1|1	1|1	1|1	0|0	0|0	0|0	0|0	0|0	1|1	1|1	1|1	1|1	1|1	1|1	0|0	0|0	1|1	1|1	1|1	1|1	2|2	0|0	1|1	1|1	0|0	1|1	1|1	1|1	1|1	1|1	1|1	2|2	1|1	1|1	1|1	1|1	1|1	Y
Cluster207	0|0	0|0	0|0	0|0	0|0	0|0	0|0	0|0	0|0	0|0	0|0	0|0	0|0	0|0	0|0	0|0	0|0	0|0	0|0	0|0	0|0	0|0	0|0	0|0	0|0	0|0	0|0	0|0	0|0	0|0	0|0	0|0	0|0	0|0	0|0	0|0	0|0	0|0	0|0	0|0	0|0	0|0	1|1	1|1	2|2	N
Cluster208	0|0	0|0	0|0	0|0	0|0	0|0	0|0	0|0	0|0	0|0	0|0	1|1	1|1	1|1	1|1	1|1	0|0	0|0	0|0	0|0	0|0	0|0	1|1	1|1	0|0	0|0	0|0	0|0	0|0	0|0	0|0	0|0	0|0	0|0	0|0	0|0	0|0	0|0	0|0	0|0	0|0	0|0	0|0	0|0	0|0	N
Cluster209	0|0	0|0	0|0	0|0	0|0	0|0	0|0	0|0	0|0	0|0	0|0	0|0	0|0	0|0	0|0	0|0	0|0	0|0	0|0	0|0	0|0	0|0	0|0	0|0	0|0	0|0	0|0	0|0	0|0	0|0	0|0	0|0	0|0	0|0	0|0	0|0	0|0	0|0	0|0	0|0	0|0	0|0	0|0	0|0	2|2	N
Cluster210	1|1	1|1	1|1	1|1	1|1	1|1	1|1	1|1	1|1	1|1	1|1	1|1	1|1	1|1	1|1	1|1	0|0	1|1	1|1	1|1	1|1	2|2	1|1	1|1	1|1	1|1	1|1	1|1	1|1	1|1	1|1	1|1	1|1	1|1	1|1	1|1	1|1	1|1	2|2	1|1	1|1	1|1	0|0	0|0	0|0	Y
Cluster211	0|0	1|1	1|1	1|1	1|1	1|1	1|1	1|1	1|1	1|1	1|1	1|1	1|1	1|1	1|1	1|1	0|0	2|2	2|2	0|0	1|1	1|1	1|1	1|1	1|1	1|1	0|0	1|1	1|1	0|0	1|1	1|1	1|1	1|1	1|1	0|0	1|1	1|1	1|1	1|1	1|1	1|1	1|1	0|0	1|1	Y
Cluster212	0|0	0|0	0|0	0|0	0|0	0|0	0|0	0|0	0|0	0|0	0|0	0|0	0|0	0|0	0|0	0|0	0|0	0|0	0|0	0|0	0|0	0|0	0|0	0|0	0|0	0|0	0|0	0|0	0|0	0|0	0|0	0|0	0|0	0|0	0|0	0|0	0|0	0|0	0|0	0|0	0|0	0|0	1|1	1|1	2|2	N
Cluster213	0|0	0|0	0|0	0|0	0|0	0|0	0|0	0|0	0|0	0|0	0|0	1|1	1|1	1|1	1|1	1|1	0|0	0|0	0|0	0|0	0|0	0|0	1|1	1|1	0|0	0|0	0|0	0|0	0|0	1|1	0|0	0|0	1|1	0|0	0|0	0|0	0|0	0|0	0|0	0|0	0|0	0|0	0|0	0|0	0|0	N
Cluster214	0|0	0|0	0|0	0|0	0|0	0|0	0|0	0|0	0|0	0|0	0|0	0|0	0|0	0|0	0|0	0|0	0|0	0|0	0|0	0|0	0|0	0|0	0|0	0|0	0|0	0|0	0|0	0|0	0|0	0|0	0|0	0|0	0|0	0|0	0|0	0|0	0|0	0|0	0|0	0|0	0|0	0|0	1|1	2|2	1|1	N
Cluster215	0|0	0|0	0|0	0|0	0|0	0|0	0|0	0|0	0|0	0|0	0|0	1|1	1|1	1|1	1|1	1|1	0|0	0|0	0|0	0|0	0|0	0|0	1|1	2|2	0|0	0|0	0|0	0|0	0|0	0|0	0|0	0|0	0|0	0|0	0|0	0|0	0|0	0|0	0|0	0|0	0|0	0|0	0|0	0|0	0|0	N
Cluster216	0|0	0|0	0|0	0|0	0|0	0|0	0|0	0|0	0|0	0|0	0|0	0|0	0|0	0|0	0|0	0|0	0|0	0|0	0|0	0|0	0|0	0|0	0|0	0|0	1|1	0|0	0|0	0|0	0|0	0|0	0|0	0|0	0|0	0|0	0|0	0|0	0|0	0|0	0|0	1|1	0|0	0|0	0|0	0|0	0|0	N
Cluster217	0|0	0|0	0|0	0|0	0|0	0|0	0|0	0|0	0|0	0|0	0|0	1|1	1|1	1|1	2|2	1|1	0|0	0|0	0|0	0|0	0|0	0|0	0|0	1|1	0|0	0|0	0|0	0|0	0|0	0|0	0|0	0|0	0|0	0|0	0|0	0|0	0|0	0|0	0|0	0|0	0|0	0|0	0|0	0|0	0|0	N
Cluster218	1|1	1|1	1|1	1|1	1|1	1|1	1|1	1|1	1|1	1|1	1|1	1|1	1|1	1|1	1|1	1|1	1|1	1|1	1|1	1|1	1|1	1|1	1|1	1|1	1|1	1|1	1|1	1|1	2|2	1|1	1|1	1|1	1|1	1|1	1|1	1|1	1|1	1|1	1|1	1|1	1|1	1|1	1|1	1|1	1|1	Y
Cluster219	1|1	1|1	1|1	1|1	1|1	1|1	1|1	1|1	1|1	1|1	1|1	1|1	1|1	1|1	1|1	1|1	1|1	1|1	1|1	1|1	1|1	1|1	1|1	1|1	1|1	1|1	1|1	1|1	2|2	1|1	1|1	1|1	1|1	1|1	1|1	1|1	1|1	1|1	1|1	2|2	1|1	1|1	1|1	1|1	1|1	Y
Cluster220	0|0	0|0	0|0	0|0	0|0	0|0	0|0	0|0	0|0	0|0	0|0	0|0	0|0	0|0	0|0	0|0	0|0	0|0	0|0	0|0	0|0	0|0	0|0	0|0	0|0	0|0	0|0	0|0	0|0	0|0	0|0	0|0	0|0	0|0	0|0	0|0	0|0	0|0	0|0	0|0	0|0	0|0	0|0	0|0	2|2	N
Cluster221	1|1	1|1	1|1	1|1	1|1	1|1	1|1	1|1	1|1	1|1	1|1	1|1	1|1	1|1	1|1	1|1	1|1	1|1	1|1	1|1	1|1	1|1	1|1	1|1	0|0	1|1	1|1	1|1	2|2	1|1	1|1	1|1	1|1	0|1	1|1	1|1	1|1	1|1	1|1	1|1	1|1	1|1	0|0	0|0	0|0	Y
Cluster222	0|0	0|0	0|0	0|0	0|0	0|0	0|0	0|0	0|0	0|0	0|0	0|0	0|0	0|0	0|0	0|0	0|0	0|0	0|0	0|0	0|0	0|0	0|0	0|0	0|0	0|0	0|0	0|0	0|0	0|0	0|0	0|0	0|0	0|0	0|0	0|0	0|0	0|0	0|0	0|0	0|0	0|0	1|1	0|0	2|2	N
Cluster223	1|1	2|2	2|2	2|2	0|0	1|1	1|1	1|1	2|2	1|1	1|1	0|0	0|0	0|0	0|0	0|0	1|1	1|1	1|1	1|1	1|1	2|2	1|1	0|0	0|0	1|1	1|1	1|1	2|2	1|1	1|1	1|1	1|1	1|1	1|1	1|1	2|2	2|2	2|2	1|1	2|2	1|1	0|0	0|0	0|0	N
Cluster224	0|0	0|0	0|0	0|0	0|0	0|0	0|0	0|0	0|0	0|0	0|0	0|0	0|0	0|0	0|0	0|0	0|0	0|0	0|0	0|0	0|0	0|0	1|1	0|0	0|0	0|0	0|0	0|0	0|0	1|1	0|0	0|0	1|1	0|0	0|0	0|0	0|0	0|0	0|0	0|0	0|0	0|0	0|0	0|0	0|0	N
Cluster225	2|2	2|2	0|0	2|2	2|2	2|2	2|2	2|2	2|2	2|2	2|2	2|2	2|2	2|2	2|2	2|2	2|2	2|2	2|2	2|2	2|2	2|2	3|3	2|2	2|2	2|2	2|2	2|2	2|2	2|2	2|2	2|2	2|2	2|2	2|2	2|2	2|2	2|2	2|2	1|1	2|2	2|2	2|2	2|2	2|2	Y
Cluster226	0|0	0|0	0|0	0|0	0|0	0|0	0|0	0|0	0|0	0|0	0|0	0|0	0|0	0|0	0|0	0|0	0|0	0|0	0|0	0|0	0|0	0|0	0|0	0|0	0|0	0|0	0|0	0|0	0|0	0|0	0|0	1|1	0|0	0|0	0|0	0|0	0|0	0|0	0|0	0|0	0|0	0|0	0|0	0|0	0|0	N
Cluster227	0|0	0|0	0|0	0|0	0|0	0|0	0|0	0|0	0|0	0|0	0|0	0|0	0|0	0|0	0|0	0|0	0|0	0|0	0|0	0|0	0|0	0|0	0|0	0|0	0|0	0|0	0|0	0|0	0|0	0|0	0|0	1|1	0|0	0|0	0|0	0|0	0|0	0|0	0|0	0|0	0|0	0|0	1|1	1|1	1|1	N
Cluster228	1|1	1|1	1|1	1|1	1|1	1|1	1|1	1|1	1|1	1|1	1|1	1|1	1|1	1|1	1|1	1|1	1|1	1|1	1|1	1|1	1|1	1|1	1|1	1|1	1|1	1|1	1|1	1|1	2|2	1|1	1|1	1|1	1|1	1|1	1|1	1|1	1|1	1|1	1|1	1|1	1|1	1|1	1|1	1|1	1|1	Y
Cluster229	1|1	1|1	1|1	1|1	1|1	1|1	1|1	1|1	1|1	1|1	1|1	1|1	1|1	1|1	1|1	1|1	1|1	1|1	1|1	1|1	1|1	1|1	1|1	1|1	1|1	1|1	1|1	1|1	2|2	1|1	1|1	1|1	1|1	1|1	1|1	1|1	1|1	1|1	1|1	1|1	1|1	1|1	0|0	0|0	0|0	Y
Cluster230	1|1	1|1	1|1	1|1	1|1	1|1	1|1	1|1	1|1	1|1	1|1	1|1	1|1	1|1	1|1	1|1	1|1	1|1	1|1	1|1	1|1	1|1	1|1	1|1	1|1	1|1	1|1	1|1	2|2	1|1	1|1	1|1	1|1	1|1	1|1	1|1	1|1	1|1	1|1	1|1	1|1	1|1	0|0	1|1	0|0	Y
Cluster231	0|0	0|0	1|1	0|0	0|0	0|0	0|0	0|0	0|0	0|0	0|0	0|0	0|0	0|0	0|0	0|0	0|0	0|0	0|0	0|0	0|0	0|0	0|0	0|0	0|0	0|0	0|0	0|0	0|0	0|0	0|0	0|0	0|0	0|0	0|0	0|0	0|0	0|0	0|0	0|0	0|0	0|0	0|0	0|0	0|0	N
Cluster232	0|0	1|1	1|1	0|0	0|0	0|0	0|0	0|0	0|0	0|0	0|0	1|1	1|1	1|1	1|1	1|1	0|0	1|1	1|1	0|0	1|1	1|1	1|1	2|2	0|0	1|1	0|0	0|0	1|1	0|0	0|0	0|0	0|0	0|0	0|0	0|0	1|1	1|1	1|1	1|1	1|1	1|1	0|0	0|0	0|0	N
Cluster233	2|2	2|2	1|1	2|2	1|1	1|1	1|1	1|1	2|2	1|1	1|1	1|1	1|1	1|1	1|1	1|1	2|2	2|2	2|2	2|2	2|2	2|2	1|1	2|2	1|1	2|2	2|2	1|1	2|2	1|1	1|1	1|1	0|0	1|1	1|1	1|2	2|2	2|2	2|2	0|0	2|2	2|2	0|0	0|0	0|0	Y
Cluster234	0|0	0|0	0|0	0|0	0|0	0|0	0|0	0|0	0|0	0|0	0|0	0|0	0|0	0|0	0|0	0|0	0|0	0|0	0|0	0|0	0|0	0|0	0|0	0|0	0|0	0|0	0|0	0|0	0|0	0|0	0|0	0|0	0|0	0|0	0|0	0|0	0|0	0|0	0|0	0|0	0|0	0|0	1|1	1|1	0|0	N
Cluster235	1|1	1|1	1|1	1|1	1|1	1|1	1|1	1|1	1|1	1|1	1|1	1|1	1|1	1|1	1|1	1|1	1|1	1|1	1|1	1|1	1|1	1|1	1|1	1|1	1|1	1|1	1|1	1|1	2|2	1|1	1|1	1|1	1|1	1|1	1|1	1|1	1|1	1|1	1|1	1|1	1|1	1|1	1|1	1|1	1|1	Y
Cluster236	0|0	0|0	0|0	0|0	0|0	0|0	0|0	0|0	0|0	0|0	0|0	1|1	1|1	1|1	1|1	1|1	0|0	0|0	0|0	0|0	0|0	0|0	0|0	2|2	0|0	0|0	0|0	0|0	0|0	0|0	1|1	1|1	0|0	0|0	0|0	0|0	0|0	0|0	0|0	0|0	0|0	0|0	0|0	0|0	0|0	N
Cluster237	0|0	0|0	1|1	0|0	0|0	0|0	0|0	0|0	0|0	0|0	0|0	0|0	0|0	0|0	0|0	0|0	0|0	0|0	0|0	0|0	0|0	0|0	0|0	0|0	0|0	0|0	0|0	0|0	0|0	0|0	0|0	0|0	0|0	0|0	0|0	0|0	0|0	0|0	0|0	0|0	0|0	0|0	0|0	0|0	0|0	N
Cluster238	0|0	0|0	0|0	0|0	0|0	0|0	0|0	0|0	0|0	0|0	0|0	0|0	0|0	0|0	0|0	0|0	0|0	0|0	0|0	0|0	0|0	0|0	0|0	0|0	0|0	0|0	0|0	0|0	0|0	0|0	0|0	0|0	0|0	0|0	0|0	0|0	0|0	0|0	0|0	0|0	0|0	0|0	0|0	0|0	1|1	N
Cluster239	1|1	0|0	0|0	0|0	0|0	0|0	0|0	0|0	0|0	0|0	0|0	0|0	0|0	0|0	0|0	0|0	0|0	1|1	1|1	0|0	1|1	0|0	1|1	0|0	0|0	1|1	0|0	0|0	1|1	0|0	0|0	0|0	0|0	0|0	0|0	0|0	0|0	0|0	0|0	0|0	0|0	0|0	0|0	0|0	0|0	N
Cluster240	0|0	0|0	0|0	0|0	0|0	0|0	0|0	0|0	0|0	0|0	0|0	0|0	0|0	0|0	0|0	0|0	0|0	0|0	0|0	0|0	0|0	0|0	0|0	0|0	0|0	0|0	0|0	0|0	0|0	0|0	0|0	0|0	0|0	0|0	0|0	0|0	0|0	0|0	0|0	0|0	0|0	0|0	1|1	1|1	2|2	N
Cluster241	1|1	1|1	0|0	1|1	1|1	1|1	1|1	1|1	1|1	1|1	1|1	1|1	1|1	1|1	1|1	1|1	1|1	1|1	1|1	1|1	1|1	0|0	1|1	1|1	0|0	1|1	1|1	1|1	2|2	1|1	0|0	0|0	1|1	1|1	1|1	1|1	1|1	1|1	1|1	2|2	1|1	1|1	1|1	1|1	1|1	Y
Cluster242	0|0	1|1	1|1	1|1	1|1	1|1	1|1	1|1	1|1	1|1	1|1	0|0	0|0	0|0	0|0	0|0	1|1	0|0	0|0	0|0	0|0	1|1	0|0	0|0	1|1	0|0	0|0	1|1	0|0	0|0	0|0	0|0	0|0	1|1	0|0	0|0	1|1	1|1	1|1	1|1	1|1	1|1	0|0	0|0	0|0	N
Cluster243	0|0	0|0	0|0	0|0	0|0	0|0	0|0	0|0	0|0	0|0	0|0	0|0	0|0	0|0	0|0	0|0	0|0	0|0	0|0	0|0	0|0	0|0	0|0	0|0	0|0	0|0	0|0	0|0	0|0	0|0	0|0	0|0	0|0	0|0	0|0	0|0	0|0	0|0	0|0	0|0	0|0	0|0	2|2	0|0	0|0	N
Cluster244	1|1	1|1	1|1	1|1	1|1	1|1	1|1	1|1	1|1	1|1	1|1	1|1	1|1	1|1	1|1	1|1	1|1	1|1	1|1	1|1	1|1	2|2	1|1	1|1	1|1	1|1	1|1	1|1	1|1	1|1	1|1	0|0	0|0	1|1	1|1	1|1	1|1	1|1	1|1	1|1	1|1	1|1	1|1	1|1	1|1	Y
Cluster245	0|0	0|0	0|0	0|0	0|0	0|0	0|0	0|0	0|0	0|0	0|0	0|0	0|0	0|0	0|0	0|0	0|0	0|0	0|0	0|0	0|0	0|0	0|0	0|0	0|0	0|0	0|0	0|0	0|0	0|0	0|0	0|0	0|0	0|0	0|0	0|0	0|0	0|0	0|0	0|0	0|0	0|0	0|0	0|0	2|2	N
Cluster246	1|1	0|0	0|0	0|0	0|0	0|0	0|0	0|0	0|0	0|0	0|0	1|1	1|1	1|1	1|1	1|1	0|0	1|1	1|1	1|1	1|1	0|0	1|1	2|2	0|0	1|1	1|1	0|0	1|1	1|1	1|1	0|1	0|1	1|1	1|1	1|1	0|0	0|0	0|0	0|0	0|0	0|0	0|0	0|0	0|0	N
Cluster247	1|1	1|1	1|1	1|1	1|1	1|1	1|1	1|1	1|1	1|1	1|1	2|2	2|2	2|2	2|2	2|2	1|1	1|1	1|1	1|1	1|1	1|1	2|2	2|2	1|1	1|1	1|1	1|1	2|2	1|1	1|1	1|1	1|1	1|1	1|1	1|1	1|1	1|1	1|1	2|2	1|1	1|1	1|1	1|1	1|1	Y
Cluster248	2|2	2|2	1|1	2|2	2|2	2|2	2|2	2|2	2|2	2|2	2|2	2|2	2|2	2|2	2|2	2|2	2|2	2|2	2|2	2|2	2|2	2|2	2|2	2|2	2|2	2|2	2|2	2|2	3|3	2|2	2|2	1|2	1|2	2|2	2|2	2|2	2|2	2|2	2|2	0|0	2|2	2|2	1|2	1|2	2|2	Y
Cluster249	0|0	0|0	0|0	0|0	0|0	0|0	0|0	0|0	0|0	0|0	0|0	0|0	0|0	0|0	0|0	0|0	0|0	0|0	0|0	0|0	0|0	0|0	0|0	0|0	0|0	0|0	0|0	0|0	0|0	0|0	0|0	0|0	0|0	0|0	0|0	0|0	0|0	0|0	0|0	0|0	0|0	0|0	1|1	1|1	2|2	N
Cluster250	1|1	0|0	0|0	0|0	0|0	0|0	0|0	0|0	0|0	0|0	0|0	0|0	0|0	0|0	0|0	0|0	0|0	1|1	1|1	1|1	1|1	0|0	0|0	0|0	0|0	1|1	1|1	0|0	1|1	1|1	0|0	0|0	0|0	1|1	1|1	1|1	0|0	0|0	0|0	0|0	0|0	0|0	0|0	0|0	0|0	N
Cluster251	1|1	1|1	1|1	1|1	1|1	1|1	1|1	1|1	1|1	1|1	1|1	1|1	1|1	1|1	1|1	1|1	1|1	1|1	1|1	1|1	1|1	1|1	1|1	1|1	1|1	1|1	1|1	1|1	1|1	1|1	1|1	0|0	0|0	1|1	1|1	1|1	1|1	1|1	1|1	1|1	1|1	1|1	1|1	2|2	1|1	Y
Cluster252	0|0	0|0	0|0	0|0	0|0	0|0	0|0	0|0	0|0	0|0	0|0	0|0	0|0	0|0	0|0	0|0	0|0	0|0	0|0	0|0	0|0	0|0	0|0	0|0	0|0	0|0	0|0	0|0	0|0	0|0	0|0	0|0	0|0	0|0	0|0	0|0	0|0	0|0	0|0	2|2	0|0	0|0	0|0	0|0	0|0	N
Cluster253	0|0	0|0	0|0	0|0	0|0	0|0	0|0	0|0	0|0	0|0	0|0	0|0	0|0	0|0	0|0	0|0	0|0	0|0	0|0	0|0	0|0	0|0	0|0	0|0	0|0	0|0	0|0	0|0	0|0	0|0	0|0	0|0	0|0	0|0	0|0	0|0	0|0	0|0	0|0	0|0	0|0	0|0	1|1	1|1	2|2	N
Cluster254	1|1	1|1	1|1	1|1	1|1	1|1	1|1	1|1	1|1	1|1	1|1	1|1	1|1	1|1	1|1	1|1	1|1	1|1	1|1	1|1	1|1	1|1	1|1	1|1	1|1	1|1	1|1	1|1	2|2	1|1	1|1	1|1	1|1	1|1	1|1	1|1	1|1	1|1	1|1	1|1	1|1	1|1	1|1	1|1	1|1	Y
Cluster255	1|1	1|1	1|1	1|1	1|1	1|1	1|1	1|1	1|1	1|1	1|1	1|1	1|1	1|1	1|1	1|1	1|1	1|1	1|1	1|1	1|1	1|1	1|1	1|1	1|1	1|1	1|1	1|1	2|2	1|1	1|1	0|0	0|0	1|1	1|1	1|1	1|1	1|1	1|1	1|1	1|1	1|1	0|0	0|0	1|1	Y
Cluster256	1|1	1|1	1|1	1|1	0|0	0|0	0|0	1|1	1|1	0|0	0|0	2|2	1|1	1|1	1|1	1|1	1|1	1|1	1|1	1|1	1|1	1|1	1|1	1|1	0|0	1|1	1|1	0|0	1|1	0|0	0|0	0|0	1|1	0|0	0|0	0|0	1|1	1|1	1|1	1|1	1|1	1|1	1|1	1|1	1|1	N
Cluster257	1|1	1|1	1|1	1|1	1|1	1|1	1|1	1|1	1|1	1|1	1|1	1|1	1|1	1|1	1|1	1|1	1|1	1|1	1|1	1|1	1|1	1|1	1|1	1|1	1|1	1|1	1|1	1|1	2|2	1|1	1|1	1|1	1|1	1|1	1|1	1|1	1|1	1|1	1|1	2|2	1|1	1|1	1|1	1|1	1|1	Y
Cluster258	0|0	0|0	0|0	0|0	0|0	0|0	0|0	0|0	0|0	0|0	0|0	0|0	0|0	0|0	0|0	0|0	0|0	0|0	0|0	0|0	0|0	0|0	0|0	0|0	0|0	0|0	0|0	0|0	0|0	0|0	0|0	0|0	0|0	0|0	0|0	0|0	0|0	0|0	0|0	1|1	0|0	0|0	0|0	0|0	0|0	N
Cluster259	1|1	1|1	1|1	1|1	1|1	1|1	1|1	1|1	1|1	1|1	1|1	1|1	1|1	1|1	1|1	1|1	1|1	1|1	1|1	1|1	1|1	1|1	1|1	1|1	1|1	1|1	1|1	1|1	1|1	1|1	1|1	1|1	1|1	1|1	1|1	0|0	1|1	1|1	1|1	1|1	1|1	1|1	1|1	1|1	1|1	Y
Cluster260	1|1	1|1	1|1	1|1	1|1	1|1	1|1	1|1	1|1	1|1	1|1	1|1	1|1	1|1	1|1	1|1	1|1	2|2	1|1	1|1	0|0	1|1	1|1	2|2	1|1	1|1	1|1	1|1	2|2	1|1	1|1	1|1	1|1	1|1	1|1	1|1	1|1	1|1	1|1	1|1	1|1	1|1	0|0	0|0	0|0	Y
Cluster261	0|0	1|1	1|1	1|1	1|1	1|1	1|1	1|1	1|1	1|1	1|1	1|1	1|1	1|1	1|1	1|1	0|0	0|0	0|0	0|0	0|0	1|1	1|1	0|0	1|1	0|0	0|0	1|1	0|0	1|1	1|1	1|1	1|1	1|1	1|1	0|0	1|1	1|1	1|1	1|1	1|1	1|1	1|1	1|1	1|1	N
Cluster262	1|1	1|1	1|1	1|1	1|1	1|1	1|1	1|1	1|1	1|1	1|1	0|0	0|0	0|0	0|0	0|0	2|2	1|1	1|1	1|1	1|1	1|1	2|2	0|0	1|1	1|1	1|1	1|1	1|1	0|0	1|1	0|0	1|1	0|0	0|0	0|0	1|1	1|1	1|1	1|1	1|1	1|1	0|0	0|0	0|0	N
Cluster263	0|0	0|0	0|0	0|0	0|0	0|0	0|0	0|0	0|0	0|0	0|0	0|0	0|0	0|0	0|0	0|0	0|0	0|0	0|0	0|0	0|0	0|0	0|0	0|0	0|0	0|0	0|0	0|0	0|0	0|0	0|0	0|0	0|0	0|0	0|0	0|0	0|0	0|0	0|0	0|0	0|0	0|0	1|1	0|0	2|2	N
Cluster264	0|0	0|0	0|0	0|0	0|0	0|0	0|0	0|0	0|0	0|0	0|0	0|0	0|0	0|0	0|0	0|0	0|0	0|0	0|0	0|0	0|0	0|0	0|0	0|0	0|0	0|0	0|0	0|0	0|0	0|0	0|0	0|0	0|0	0|0	0|0	0|0	0|0	0|0	0|0	0|0	0|0	0|0	1|1	2|2	1|1	N
Cluster265	0|0	0|0	0|0	0|0	0|0	0|0	0|0	0|0	0|0	0|0	0|0	0|0	0|0	0|0	0|0	0|0	0|0	0|0	0|0	0|0	0|0	0|0	1|1	0|0	0|0	0|0	0|0	0|0	0|0	0|0	0|0	0|0	0|0	0|0	0|0	0|0	0|0	0|0	0|0	0|0	0|0	0|0	1|1	2|2	2|2	N
Cluster266	1|1	0|0	0|0	0|0	0|0	0|0	0|0	0|0	0|0	0|0	0|0	1|1	1|1	1|1	1|1	1|1	0|0	0|0	0|0	0|0	1|1	0|0	0|0	0|0	0|0	1|1	0|0	0|0	0|0	0|0	0|0	0|0	0|0	0|0	0|0	0|0	0|0	0|0	0|0	0|0	0|0	0|0	0|0	0|0	0|0	N
Cluster267	1|1	1|1	1|1	1|1	1|1	1|1	1|1	1|1	1|1	1|1	1|1	1|1	1|1	1|1	1|1	1|1	1|1	1|1	1|1	1|1	1|1	1|1	1|1	1|1	1|1	1|1	1|1	1|1	2|2	1|1	1|1	1|1	1|1	1|1	1|1	1|1	1|1	1|1	1|1	1|1	1|1	1|1	1|1	1|1	1|1	Y
Cluster268	0|0	0|0	0|0	0|0	0|0	0|0	0|0	0|0	0|0	0|0	0|0	0|0	0|0	0|0	0|0	0|0	0|0	0|0	1|1	0|0	0|0	0|0	0|0	0|0	0|0	0|0	0|0	0|0	0|0	0|0	0|0	0|0	0|0	0|0	0|0	0|0	0|0	0|0	0|0	1|1	0|0	0|0	0|0	0|0	0|0	N
Cluster269	0|0	0|0	0|0	0|0	0|0	0|0	0|0	0|0	0|0	0|0	0|0	0|0	0|0	0|0	0|0	0|0	0|0	0|0	0|0	0|0	0|0	0|0	0|0	0|0	0|0	0|0	0|0	0|0	0|0	0|0	0|0	0|0	0|0	0|0	0|0	0|0	0|0	0|0	0|0	2|2	0|0	0|0	0|0	0|0	0|0	N
Cluster270	0|0	0|0	0|0	0|0	0|0	0|0	0|0	0|0	0|0	0|0	0|0	0|0	0|0	0|0	0|0	0|0	0|0	0|0	0|0	0|0	0|0	0|0	0|0	0|0	0|0	0|0	0|0	0|0	0|0	0|0	0|0	0|0	0|0	0|0	0|0	0|0	0|0	0|0	0|0	0|0	0|0	0|0	0|0	0|0	2|2	N
Cluster271	0|0	1|1	1|1	1|1	1|1	1|1	1|1	1|1	1|1	1|1	1|1	0|0	0|0	0|0	0|0	0|0	1|1	0|0	0|0	0|0	0|0	2|2	0|0	0|0	1|1	0|0	0|0	1|1	0|0	0|0	0|0	0|0	0|0	0|0	0|0	0|0	1|1	1|1	1|1	1|1	1|1	1|1	1|1	1|1	1|1	N
Cluster272	0|0	0|0	0|0	0|0	0|0	0|0	0|0	0|0	0|0	0|0	0|0	0|0	1|1	0|0	0|0	0|0	0|0	0|0	0|0	0|0	0|0	1|1	1|1	0|0	0|0	0|0	0|0	0|0	0|0	1|1	1|1	1|1	0|0	0|0	1|1	0|0	1|1	1|1	0|0	0|0	1|1	0|0	0|0	0|0	0|0	N
Cluster273	1|1	1|1	1|1	1|1	1|1	1|1	1|1	1|1	1|1	1|1	1|1	1|1	1|1	1|1	1|1	1|1	1|1	1|1	1|1	1|1	1|1	1|1	1|1	1|1	0|0	1|1	1|1	1|1	2|2	1|1	1|1	1|1	1|1	1|1	1|1	1|1	1|1	1|1	1|1	1|1	1|1	1|1	1|1	1|1	1|1	Y
Cluster274	1|1	1|1	1|1	1|1	1|1	1|1	1|1	1|1	1|1	1|1	1|1	1|1	1|1	1|1	1|1	1|1	1|1	1|1	1|1	1|1	1|1	1|1	2|2	1|1	1|1	1|1	1|1	1|1	1|1	1|1	1|1	1|1	1|1	1|1	1|1	1|1	1|1	1|1	1|1	1|1	1|1	1|1	0|0	0|0	1|1	Y
Cluster275	0|0	0|0	0|0	0|0	0|0	0|0	0|0	0|0	0|0	0|0	0|0	0|0	0|0	0|0	0|0	0|0	0|0	0|0	0|0	0|0	0|0	0|0	0|0	0|0	0|0	0|0	0|0	0|0	0|0	0|0	0|0	0|0	0|0	0|0	0|0	0|0	0|0	0|0	0|0	0|0	0|0	0|0	1|1	1|1	2|2	N
Cluster276	1|1	2|2	2|2	2|2	1|1	1|1	2|2	2|2	2|2	1|1	1|1	2|2	2|2	2|2	2|2	2|2	0|0	0|0	0|0	3|3	0|0	2|2	2|2	2|2	1|1	0|0	2|2	1|1	0|0	0|0	1|1	1|1	1|1	1|1	1|1	1|1	2|2	2|2	2|2	2|2	2|2	2|2	1|1	1|1	1|1	Y
Cluster277	0|0	1|1	1|1	1|1	1|1	1|1	1|1	1|1	1|1	1|1	1|1	0|0	0|0	0|0	0|0	0|0	0|0	0|0	0|0	1|1	0|0	1|1	0|0	0|0	1|1	0|0	1|1	1|1	0|0	1|1	1|1	0|0	0|0	1|1	1|1	1|1	1|1	1|1	1|1	1|1	1|1	1|1	0|0	0|0	0|0	N
Cluster278	0|0	0|0	0|0	0|0	0|0	0|0	0|0	0|0	0|0	0|0	0|0	0|0	0|0	0|0	0|0	0|0	0|0	0|0	0|0	0|0	0|0	0|0	0|0	0|0	0|0	0|0	0|0	0|0	0|0	0|0	0|0	0|0	0|0	0|0	0|0	0|0	0|0	0|0	0|0	1|1	0|0	0|0	0|0	0|0	0|0	N
Cluster279	1|1	1|1	1|1	1|1	1|1	1|1	1|1	1|1	1|1	1|1	1|1	1|1	1|1	1|1	1|1	1|1	1|1	1|1	1|1	1|1	1|1	2|2	1|1	1|1	1|1	1|1	1|1	1|1	1|1	1|1	1|1	1|1	1|1	1|1	1|1	1|1	1|1	1|1	1|1	1|1	1|1	1|1	1|1	1|1	1|1	Y
Cluster280	0|0	0|0	0|0	0|0	0|0	0|0	0|0	0|0	0|0	0|0	0|0	0|0	0|0	0|0	0|0	0|0	0|0	0|0	0|0	0|0	0|0	0|0	0|0	0|0	0|0	0|0	0|0	0|0	0|0	0|0	0|0	0|0	0|0	0|0	0|0	0|0	0|0	0|0	0|0	0|0	0|0	0|0	1|1	1|1	1|1	N
Cluster281	0|0	0|0	0|0	0|0	0|0	0|0	0|0	0|0	0|0	0|0	0|0	0|0	0|0	0|0	0|0	0|0	0|0	0|0	0|0	0|0	0|0	0|0	0|0	0|0	0|0	0|0	0|0	0|0	0|0	0|0	0|0	0|0	0|0	0|0	0|0	0|0	0|0	0|0	0|0	0|0	0|0	0|0	0|0	2|2	0|0	N
Cluster282	1|1	1|1	1|1	1|1	1|1	1|1	1|1	1|1	1|1	1|1	1|1	1|1	1|1	1|1	1|1	1|1	1|1	1|1	1|1	1|1	1|1	1|1	1|1	1|1	1|1	1|1	1|1	1|1	2|2	1|1	1|1	1|1	1|1	1|1	1|1	1|1	1|1	1|1	1|1	1|1	1|1	1|1	1|1	1|1	1|1	Y
Cluster283	0|0	0|0	0|0	0|0	0|0	0|0	0|0	0|0	0|0	0|0	0|0	1|1	1|1	1|1	1|1	1|1	0|0	0|0	0|0	0|0	0|0	0|0	2|2	1|1	0|0	0|0	0|0	0|0	0|0	0|0	0|0	0|0	1|1	0|0	0|0	0|0	0|0	0|0	0|0	0|0	0|0	0|0	0|0	0|0	0|0	N
Cluster284	0|0	1|1	1|1	1|1	1|1	1|1	1|1	1|1	1|1	1|1	1|1	0|0	0|0	0|0	0|0	0|0	0|0	0|0	0|0	1|1	0|0	1|1	0|0	0|0	1|1	0|0	1|1	1|1	0|0	1|1	0|0	1|1	0|0	0|0	1|1	1|1	1|1	1|1	1|1	1|1	1|1	1|1	0|0	2|2	0|0	N
Cluster285	1|1	1|1	1|1	1|1	1|1	1|1	1|1	1|1	1|1	1|1	1|1	1|1	1|1	1|1	1|1	1|1	1|1	1|1	1|1	1|1	1|1	1|1	1|1	1|1	1|1	1|1	1|1	1|1	2|2	1|1	0|0	1|1	1|1	1|1	1|1	1|1	1|1	1|1	1|1	1|1	1|1	1|1	1|1	1|1	0|0	Y
Cluster286	1|1	1|1	1|1	0|0	0|0	0|0	0|0	0|0	0|0	0|0	0|0	0|0	0|0	0|0	0|0	0|0	1|1	1|1	1|1	2|2	1|1	1|1	0|0	0|0	0|0	1|1	1|1	0|0	1|1	0|0	0|0	0|0	0|0	0|0	1|1	0|0	1|1	1|1	1|1	0|0	1|1	1|1	0|0	0|0	1|1	N
Cluster287	1|1	0|0	0|0	0|0	0|0	0|0	0|0	0|0	0|0	0|0	0|0	0|0	0|0	0|0	0|0	0|0	0|0	0|0	0|0	1|1	0|0	0|0	0|0	0|0	0|0	0|0	1|1	0|0	0|0	0|0	1|1	0|0	0|0	1|1	1|1	0|0	0|0	0|0	0|0	0|0	0|0	0|0	0|0	0|0	2|2	N
Cluster288	0|0	0|0	0|0	0|0	0|0	0|0	0|0	0|0	0|0	0|0	0|0	0|0	0|0	0|0	0|0	0|0	0|0	0|0	0|0	0|0	0|0	0|0	0|0	0|0	0|0	0|0	0|0	0|0	0|0	0|0	0|0	0|0	0|0	0|0	0|0	0|0	0|0	0|0	0|0	0|0	0|0	0|0	1|1	0|0	0|0	N
Cluster289	1|1	1|1	1|1	1|1	1|1	1|1	1|1	1|1	1|1	1|1	1|1	1|1	1|1	1|1	1|1	1|1	1|1	1|1	1|1	1|1	1|1	1|1	1|1	1|1	1|1	1|1	1|1	1|1	2|2	1|1	1|1	1|1	1|1	1|1	1|1	1|1	1|1	1|1	1|1	0|0	1|1	1|1	0|0	0|0	0|0	Y
Cluster290	0|0	1|1	1|1	1|1	1|1	1|1	1|1	1|1	1|1	1|1	1|1	0|0	0|0	0|0	0|0	0|0	1|1	1|1	1|1	1|1	1|1	1|1	0|0	0|0	1|1	1|1	1|1	1|1	1|1	1|1	1|1	0|0	0|0	1|1	1|1	1|1	1|1	1|1	1|1	1|1	1|1	1|1	1|1	1|1	0|0	N
Cluster291	1|1	1|1	0|0	1|1	1|1	1|1	1|1	1|1	1|1	1|1	1|1	0|0	0|0	0|0	0|0	0|0	0|0	0|0	0|0	0|0	0|0	1|1	0|0	0|0	1|1	0|0	0|0	1|1	0|0	1|1	1|1	0|0	0|0	1|1	1|1	1|1	1|1	1|1	1|1	1|1	1|1	1|1	1|1	1|1	2|2	N
Cluster292	1|1	1|1	1|1	1|1	1|1	1|1	1|1	1|1	1|1	1|1	1|1	1|1	1|1	1|1	1|1	1|1	1|1	1|1	1|1	1|1	1|1	1|1	1|1	1|1	1|1	1|1	1|1	1|1	1|1	1|1	1|1	1|1	1|1	1|1	1|1	1|1	1|1	1|1	1|1	1|1	1|1	1|1	1|1	1|1	1|1	Y
Cluster293	1|1	1|1	1|1	1|1	1|1	1|1	1|1	1|1	1|1	1|1	1|1	1|1	1|1	1|1	1|1	1|1	0|0	0|0	0|0	2|2	0|0	1|1	2|2	1|1	1|1	0|0	2|2	1|1	0|0	1|1	1|1	1|1	1|1	1|1	1|1	1|1	1|1	1|1	1|1	1|1	1|1	1|1	0|0	0|0	0|0	Y
Cluster294	0|0	0|0	0|0	0|0	0|0	0|0	0|0	0|0	0|0	0|0	0|0	0|0	0|0	0|0	0|0	0|0	0|0	0|0	0|0	0|0	0|0	0|0	0|0	0|0	0|0	0|0	0|0	0|0	0|0	0|0	0|0	0|0	0|0	0|0	0|0	0|0	0|0	0|0	0|0	0|0	0|0	0|0	0|0	2|2	1|1	N
Cluster295	1|1	0|0	0|0	0|0	0|0	0|0	0|0	0|0	0|0	0|0	0|0	0|0	0|0	0|0	0|0	0|0	0|0	1|1	1|1	2|2	1|1	0|0	0|0	0|0	0|0	1|1	1|1	0|0	1|1	0|0	0|0	0|0	0|0	0|0	0|0	0|0	0|0	0|0	0|0	0|0	0|0	0|0	0|0	0|0	0|0	N
Cluster296	0|0	0|0	0|0	0|0	0|0	0|0	0|0	0|0	0|0	0|0	0|0	0|0	0|0	0|0	0|0	0|0	0|0	0|0	0|0	0|0	0|0	0|0	0|0	0|0	0|0	0|0	0|0	0|0	0|0	0|0	0|0	0|0	0|0	0|0	0|0	0|0	0|0	0|0	0|0	0|0	0|0	0|0	1|1	1|1	2|2	N
Cluster297	1|1	1|1	1|1	1|1	1|1	1|1	1|1	1|1	1|1	1|1	1|1	1|1	1|1	1|1	1|1	1|1	1|1	1|1	1|1	1|1	1|1	1|1	1|1	0|0	1|1	1|1	1|1	1|1	2|2	0|0	1|1	1|1	1|1	1|1	1|1	1|1	1|1	1|1	1|1	1|1	1|1	1|1	1|1	1|1	1|1	Y
Cluster298	0|0	0|0	0|0	0|0	0|0	0|0	0|0	0|0	0|0	0|0	0|0	0|0	0|0	0|0	0|0	0|0	0|0	0|0	0|0	0|0	0|0	0|0	0|0	0|0	0|0	0|0	0|0	0|0	0|0	0|0	0|0	0|0	0|0	0|0	0|0	0|0	0|0	0|0	0|0	0|0	0|0	0|0	1|1	1|1	2|2	N
Cluster299	0|0	0|0	1|1	0|0	0|0	0|0	0|0	0|0	0|0	0|0	0|0	0|0	0|0	0|0	0|0	0|0	0|0	0|0	0|0	0|0	1|1	0|0	0|0	0|0	0|0	0|0	0|0	0|0	0|0	0|0	0|0	0|0	0|0	0|0	0|0	0|0	0|0	0|0	0|0	0|0	0|0	0|0	0|0	1|1	0|0	N
Cluster300	1|1	1|1	1|1	1|1	1|1	1|1	1|1	1|1	1|1	1|1	1|1	1|1	1|1	1|1	1|1	1|1	1|1	1|1	1|1	1|1	1|1	1|1	1|1	1|1	1|1	1|1	1|1	1|1	1|1	1|1	1|1	0|0	1|1	1|1	1|1	1|1	1|1	1|1	1|1	1|1	1|1	1|1	1|1	1|1	1|1	Y
Cluster301	0|0	0|0	0|0	0|0	0|0	0|0	0|0	0|0	0|0	0|0	0|0	0|0	0|0	0|0	0|0	0|0	0|0	0|0	0|0	0|0	0|0	0|0	0|0	0|0	0|0	0|0	0|0	0|0	0|0	0|0	0|0	0|0	0|0	0|0	0|0	0|0	0|0	0|0	0|0	1|1	0|0	0|0	0|0	0|0	0|0	N
Cluster302	0|0	1|1	0|0	1|1	1|1	1|1	1|1	1|1	1|1	1|1	1|1	0|0	0|0	0|0	0|0	0|0	0|0	0|0	0|0	1|1	0|0	1|1	1|1	0|0	1|1	0|0	1|1	1|1	0|0	0|0	1|1	1|1	0|0	0|0	0|0	0|0	1|1	1|1	1|1	1|1	1|1	1|1	1|1	1|1	2|2	N
Cluster303	1|1	1|1	1|1	1|1	1|1	1|1	1|1	1|1	1|1	1|1	1|1	0|0	0|0	0|0	0|0	0|0	1|1	1|1	1|1	1|1	1|1	1|1	0|0	0|0	1|1	1|1	1|1	1|1	1|1	1|1	1|1	1|1	0|0	0|0	1|1	1|1	1|1	1|1	1|1	1|1	1|1	1|1	1|1	1|1	1|1	Y
Cluster304	1|1	1|1	1|1	1|1	1|1	1|1	1|1	1|1	1|1	1|1	1|1	0|0	0|0	0|0	0|0	0|0	1|1	1|1	1|1	1|1	1|1	1|1	0|0	0|0	1|1	1|1	1|1	1|1	1|1	0|0	1|1	0|0	0|0	0|0	1|1	0|0	1|1	1|1	1|1	1|1	1|1	1|1	1|1	1|1	1|1	N
Cluster305	0|0	0|0	0|0	0|0	0|0	0|0	0|0	0|0	0|0	0|0	0|0	0|0	0|0	0|0	0|0	0|0	0|0	0|0	1|1	0|0	0|0	0|0	0|0	1|1	0|0	0|0	0|0	0|0	0|0	1|1	0|0	0|0	0|0	0|0	0|0	0|0	0|0	0|0	0|0	0|0	0|0	0|0	0|0	0|0	0|0	N
Cluster306	0|0	0|0	1|1	0|0	0|0	0|0	0|0	0|0	0|0	0|0	0|0	0|0	0|0	0|0	0|0	0|0	0|0	0|0	1|1	0|0	0|0	0|0	0|0	0|0	0|0	0|0	0|0	0|0	0|0	0|0	0|0	0|0	0|0	0|0	0|0	0|0	0|0	0|0	0|0	0|0	0|0	0|0	0|0	0|0	0|0	N
Cluster307	1|1	1|1	1|1	1|1	0|0	0|0	0|0	0|0	1|1	0|0	0|0	0|0	0|0	0|0	0|0	0|0	1|1	1|1	1|1	1|1	1|1	1|1	0|0	0|0	0|0	1|1	1|1	0|0	1|1	0|0	0|0	0|0	0|0	0|0	0|0	0|0	1|1	1|1	1|1	1|1	1|1	1|1	0|0	0|0	0|0	N
Cluster308	1|1	1|1	1|1	1|1	1|1	1|1	1|1	1|1	1|1	1|1	1|1	1|1	1|1	1|1	1|1	1|1	1|1	1|1	1|1	1|1	1|1	1|1	1|1	1|1	1|1	1|1	1|1	1|1	1|1	1|1	1|1	1|1	1|1	1|1	1|1	1|1	1|1	1|1	1|1	1|1	1|1	1|1	1|1	1|1	1|1	Y
Cluster309	0|0	0|0	1|1	0|0	0|0	0|0	0|0	0|0	0|0	0|0	0|0	0|0	0|0	0|0	0|0	0|0	0|0	0|0	0|0	0|0	0|0	0|0	0|0	0|0	0|0	0|0	0|0	0|0	0|0	0|0	0|0	0|0	0|0	0|0	0|0	0|0	0|0	0|0	0|0	0|0	0|0	0|0	0|0	0|0	0|0	N
Cluster310	1|1	1|1	1|1	1|1	1|1	1|1	1|1	1|1	1|1	1|1	1|1	0|0	0|0	0|0	0|0	0|0	1|1	1|1	1|1	1|1	1|1	1|1	0|0	0|0	1|1	1|1	1|1	1|1	1|1	0|0	1|1	1|1	0|0	1|1	0|0	0|0	1|1	1|1	1|1	0|0	1|1	1|1	0|0	0|0	1|1	N
Cluster311	0|0	0|0	0|0	0|0	0|0	0|0	0|0	0|0	0|0	0|0	0|0	0|0	0|0	0|0	0|0	0|0	0|0	0|0	0|0	0|0	0|0	0|0	0|0	0|0	0|0	0|0	0|0	0|0	0|0	0|0	0|0	0|0	0|0	0|0	0|0	0|0	0|0	0|0	0|0	0|0	0|0	0|0	1|1	1|1	0|0	N
Cluster312	1|1	1|1	1|1	1|1	1|1	1|1	1|1	1|1	1|1	1|1	1|1	0|0	0|0	0|0	0|0	0|0	1|1	1|1	1|1	1|1	1|1	1|1	0|0	0|0	1|1	1|1	1|1	1|1	1|1	1|1	1|1	0|0	0|0	1|1	1|1	1|1	1|1	1|1	1|1	1|1	1|1	1|1	1|1	1|1	1|1	Y
Cluster313	0|0	0|0	0|0	0|0	0|0	0|0	0|0	0|0	0|0	0|0	0|0	0|0	0|0	0|0	0|0	0|0	0|0	0|0	0|0	0|0	0|0	0|0	0|0	0|0	0|0	0|0	0|0	0|0	0|0	0|0	0|0	0|0	0|0	0|0	0|0	0|0	0|0	0|0	0|0	2|2	0|0	0|0	0|0	0|0	0|0	N
Cluster314	1|1	1|1	1|1	1|1	1|1	1|1	1|1	1|1	1|1	1|1	1|1	1|1	1|1	1|1	1|1	1|1	1|1	1|1	1|1	1|1	1|1	1|1	1|1	1|1	1|1	1|1	1|1	1|1	2|2	1|1	1|1	1|1	1|1	1|1	1|1	1|1	1|1	1|1	1|1	1|1	1|1	1|1	0|0	0|0	0|0	Y
Cluster315	1|1	1|1	1|1	1|1	1|1	1|1	1|1	1|1	1|1	1|1	1|1	1|1	1|1	1|1	1|1	1|1	1|1	1|1	1|1	1|1	1|1	1|1	1|1	2|2	1|1	1|1	1|1	1|1	1|1	1|1	1|1	1|1	1|1	1|1	1|1	1|1	1|1	1|1	1|1	1|1	1|1	1|1	0|0	0|0	0|0	Y
Cluster316	0|0	0|0	0|0	0|0	0|0	0|0	0|0	0|0	0|0	0|0	0|0	0|0	0|0	0|0	0|0	0|0	0|0	0|0	0|0	0|0	0|0	0|0	0|0	0|0	0|0	0|0	0|0	0|0	0|0	0|0	0|0	0|0	0|0	0|0	0|0	0|0	0|0	0|0	0|0	1|1	0|0	0|0	0|0	0|0	0|0	N
Cluster317	1|1	1|1	1|1	1|1	1|1	1|1	1|1	1|1	1|1	1|1	1|1	0|0	0|0	0|0	0|0	0|0	1|1	1|1	1|1	0|0	1|1	1|1	0|0	0|0	1|1	1|1	0|0	1|1	1|1	0|0	1|1	0|0	0|0	0|0	0|0	0|0	1|1	1|1	1|1	1|1	1|1	1|1	0|0	0|0	1|1	N
Cluster318	0|0	0|0	0|0	0|0	0|0	0|0	0|0	0|0	0|0	0|0	0|0	0|0	0|0	0|0	0|0	0|0	0|0	0|0	0|0	0|0	0|0	0|0	0|0	0|0	0|0	0|0	0|0	0|0	0|0	0|0	0|0	0|0	0|0	0|0	0|0	0|0	0|0	0|0	0|0	1|1	0|0	0|0	0|0	0|0	0|0	N
Cluster319	1|1	2|2	0|1	2|2	1|1	1|1	1|1	1|1	2|2	1|1	1|1	1|1	1|1	1|1	1|1	1|1	2|2	1|1	1|1	1|1	1|1	2|2	1|1	1|1	1|1	1|1	1|1	1|1	2|2	1|1	1|1	0|0	0|0	2|2	2|2	2|2	2|2	2|2	2|2	1|1	2|2	2|2	0|0	1|1	1|1	Y
Cluster320	0|0	0|0	0|0	0|0	0|0	0|0	0|0	0|0	0|0	0|0	0|0	1|1	1|1	1|1	1|1	1|1	0|0	0|0	0|0	0|0	0|0	0|0	1|1	2|2	0|0	0|0	0|0	0|0	0|0	0|0	0|0	0|0	0|0	0|0	0|0	0|0	0|0	0|0	0|0	0|0	0|0	0|0	0|0	0|0	0|0	N
Cluster321	0|0	0|0	0|0	0|0	0|0	0|0	0|0	0|0	0|0	0|0	0|0	0|0	0|0	0|0	0|0	0|0	0|0	0|0	0|0	0|0	0|0	0|0	0|0	0|0	0|0	0|0	0|0	0|0	0|0	1|1	0|0	0|0	0|0	1|1	1|1	0|0	0|0	0|0	0|0	0|0	0|0	0|0	1|1	1|1	2|2	N
Cluster322	0|0	0|0	0|0	0|0	0|0	0|0	0|0	0|0	0|0	0|0	0|0	0|0	0|0	0|0	0|0	0|0	0|0	0|0	0|0	0|0	1|1	0|0	0|0	0|0	0|0	0|0	0|0	0|0	0|0	0|0	0|0	0|0	0|0	0|0	0|0	0|0	0|0	0|0	0|0	2|2	0|0	0|0	0|0	0|0	0|0	N
Cluster323	0|0	0|0	0|0	0|0	0|0	0|0	0|0	0|0	0|0	0|0	0|0	0|0	0|0	0|0	0|0	0|0	0|0	0|0	0|0	0|0	0|0	0|0	0|0	0|0	0|0	0|0	0|0	0|0	0|0	0|0	0|0	0|0	0|0	0|0	0|0	0|0	0|0	0|0	0|0	0|0	0|0	0|0	0|0	2|2	0|0	N
Cluster324	0|0	0|0	0|0	0|0	0|0	0|0	0|0	0|0	0|0	0|0	0|0	0|0	0|0	0|0	0|0	0|0	0|0	0|0	0|0	0|0	0|0	0|0	0|0	0|0	0|0	0|0	0|0	0|0	0|0	0|0	0|0	0|0	0|0	0|0	0|0	0|0	0|0	0|0	0|0	0|0	0|0	0|0	2|2	2|2	0|0	N
Cluster325	0|0	1|1	1|1	1|1	1|1	1|1	1|1	1|1	1|1	1|1	1|1	1|1	1|1	1|1	1|1	1|1	0|0	0|0	0|0	1|1	0|0	1|1	1|1	1|1	1|1	0|0	1|1	1|1	0|0	1|1	1|1	1|1	0|0	1|1	1|1	1|1	1|1	1|1	1|1	1|1	1|1	1|1	1|1	1|1	0|0	Y
Cluster326	1|1	1|1	1|1	1|1	1|1	1|1	1|1	1|1	1|1	1|1	1|1	0|0	0|0	0|0	0|0	0|0	2|2	2|2	2|2	1|1	2|2	2|2	1|1	0|0	1|1	1|1	1|1	1|1	1|1	1|1	1|1	1|1	0|0	0|1	0|0	1|1	1|1	1|1	1|1	1|1	1|1	1|1	1|1	1|1	1|1	Y
Cluster327	1|1	1|1	1|1	1|1	0|0	0|0	1|1	1|1	1|1	0|0	0|0	1|1	1|1	1|1	1|1	1|1	0|0	1|1	1|1	1|1	1|1	1|1	2|2	2|2	0|0	1|1	1|1	0|0	1|1	0|0	0|0	1|1	0|1	0|0	0|0	0|0	1|1	1|1	1|1	1|1	1|1	1|1	0|0	0|0	0|0	N
Cluster328	0|0	0|0	0|0	0|0	0|0	0|0	0|0	0|0	0|0	0|0	0|0	0|0	0|0	0|0	0|0	0|0	0|0	0|0	0|0	0|0	0|0	0|0	0|0	0|0	0|0	0|0	0|0	0|0	0|0	0|0	0|0	0|0	0|0	0|0	0|0	0|0	0|0	0|0	0|0	2|2	0|0	0|0	0|0	0|0	0|0	N
Cluster329	1|1	1|1	1|1	1|1	1|1	1|1	1|1	1|1	1|1	1|1	1|1	1|1	1|1	1|1	1|1	1|1	1|1	1|1	1|1	1|1	1|1	1|1	1|1	1|1	1|1	1|1	1|1	1|1	1|1	1|1	1|1	0|0	1|1	1|1	1|1	1|1	1|1	1|1	1|1	1|1	1|1	1|1	1|1	1|1	1|1	Y
Cluster330	1|1	1|1	1|1	1|1	1|1	1|1	1|1	1|1	1|1	1|1	1|1	0|0	0|0	0|0	0|0	0|0	1|1	1|1	1|1	1|1	1|1	1|1	0|0	0|0	1|1	1|1	1|1	1|1	1|1	1|1	1|1	1|1	0|0	1|1	1|1	1|1	1|1	1|1	1|1	0|0	1|1	1|1	1|1	1|1	1|1	Y
Cluster331	1|1	1|1	0|0	1|1	1|1	1|1	1|1	1|1	1|1	1|1	1|1	0|0	0|0	0|0	0|0	0|0	1|1	1|1	1|1	0|0	1|1	1|1	0|0	0|0	1|1	0|0	0|0	1|1	1|1	0|0	1|1	0|0	0|0	1|1	1|1	1|1	1|1	1|1	1|1	1|1	1|1	2|2	0|0	0|0	0|0	N
Cluster332	1|1	1|1	1|1	1|1	1|1	1|1	1|1	1|1	1|1	1|1	1|1	0|0	0|0	0|0	0|0	0|0	1|1	1|1	1|1	1|1	1|1	1|1	0|0	0|0	1|1	1|1	1|1	1|1	1|1	0|0	1|1	0|0	0|0	0|0	0|0	1|1	1|1	1|1	1|1	1|1	1|1	1|1	0|0	0|0	0|0	N
Cluster333	1|1	1|1	1|1	1|1	1|1	1|1	1|1	1|1	1|1	1|1	1|1	1|1	1|1	1|1	1|1	1|1	1|1	1|1	1|1	1|1	1|1	1|1	1|1	1|1	1|1	1|1	1|1	1|1	1|1	1|1	1|1	1|1	1|1	1|1	1|1	0|0	1|1	1|1	1|1	1|1	1|1	1|1	1|1	1|1	1|1	Y
Cluster334	1|1	1|1	1|1	1|1	1|1	1|1	1|1	1|1	1|1	1|1	1|1	1|1	1|1	1|1	1|1	1|1	1|1	1|1	1|1	1|1	1|1	1|1	1|1	1|1	1|1	1|1	1|1	1|1	1|1	1|1	1|1	1|1	1|1	1|1	1|1	1|1	1|1	1|1	1|1	1|1	1|1	1|1	1|1	1|1	1|1	Y
Cluster335	1|1	1|1	1|1	1|1	1|1	1|1	1|1	1|1	1|1	1|1	1|1	1|1	1|1	1|1	1|1	1|1	1|1	1|1	1|1	1|1	1|1	1|1	1|1	1|1	1|1	1|1	1|1	1|1	2|2	1|1	1|1	1|1	1|1	1|1	1|1	1|1	1|1	1|1	1|1	1|1	1|1	1|1	1|1	1|1	1|1	Y
Cluster336	1|1	1|1	1|2	0|0	1|1	1|1	1|1	0|0	0|0	1|1	1|1	0|0	0|0	0|0	0|0	0|0	1|1	1|1	1|1	1|1	1|1	1|1	1|1	1|1	1|1	1|1	1|1	1|1	2|2	0|0	1|1	0|0	0|0	0|0	0|0	1|1	1|1	1|1	0|0	0|0	1|1	1|1	0|0	0|0	0|0	N
Cluster337	1|1	1|1	1|1	1|1	1|1	1|1	1|1	1|1	1|1	1|1	1|1	0|0	0|0	0|0	0|0	0|0	1|1	1|1	1|1	1|1	1|1	1|1	0|0	0|0	1|1	1|1	1|1	1|1	1|1	1|1	1|1	0|0	0|0	1|1	0|0	1|1	1|1	1|1	1|1	1|1	1|1	1|1	0|0	0|0	1|1	N
Cluster338	0|0	0|0	0|0	0|0	0|0	0|0	0|0	0|0	0|0	0|0	0|0	0|0	0|0	0|0	0|0	0|0	0|0	0|0	0|0	0|0	0|0	0|0	0|0	0|0	0|0	0|0	0|0	0|0	0|0	0|0	0|0	0|0	0|0	0|0	0|0	0|0	0|0	0|0	0|0	0|0	0|0	0|0	0|0	2|2	0|0	N
Cluster339	1|1	1|1	1|1	1|1	1|1	1|1	1|1	1|1	1|1	1|1	1|1	0|0	0|0	0|0	0|0	0|0	1|1	1|1	1|1	1|1	1|1	1|1	0|0	0|0	1|1	1|1	1|1	1|1	1|1	1|1	1|1	0|0	0|0	1|1	1|1	1|1	1|1	1|1	1|1	1|1	1|1	1|1	1|1	1|1	1|1	Y
Cluster340	1|1	1|1	1|1	1|1	1|1	1|1	1|1	1|1	1|1	1|1	1|1	1|1	1|1	1|1	1|1	1|1	1|1	1|1	1|1	1|1	1|1	1|1	0|0	1|1	1|1	1|1	1|1	1|1	1|1	1|1	1|1	1|1	1|1	1|1	1|1	1|1	1|1	1|1	1|1	1|1	1|1	1|1	1|1	1|1	1|1	Y
Cluster341	1|1	1|1	1|1	1|1	1|1	1|1	1|1	1|1	1|1	1|1	1|1	1|1	1|1	1|1	1|1	1|1	0|0	1|1	1|1	2|2	1|1	1|1	1|1	1|1	0|0	1|1	1|1	1|1	1|1	1|1	1|1	0|0	0|0	1|1	1|1	1|1	1|1	1|1	1|1	1|1	1|1	1|1	0|0	0|0	0|0	Y
Cluster342	0|0	0|0	1|1	0|0	0|0	0|0	0|0	0|0	0|0	0|0	0|0	0|0	0|0	0|0	0|0	0|0	0|0	0|0	0|0	0|0	0|0	0|0	0|0	0|0	0|0	0|0	0|0	0|0	0|0	0|0	0|0	0|0	0|0	0|0	0|0	0|0	0|0	0|0	0|0	0|0	0|0	0|0	0|0	0|0	0|0	N
Cluster343	2|2	0|0	0|0	0|0	0|0	0|0	0|0	0|0	0|0	0|0	0|0	0|0	0|0	0|0	0|0	0|0	0|0	1|1	1|1	1|1	2|2	0|0	0|0	0|0	0|0	1|1	1|1	0|0	0|0	0|0	0|0	0|0	0|0	0|0	0|0	0|0	0|0	0|0	0|0	0|0	0|0	0|0	0|0	0|0	0|0	N
Cluster344	1|1	1|1	1|1	1|1	1|1	1|1	1|1	1|1	1|1	1|1	1|1	1|1	1|1	1|1	1|1	1|1	1|1	1|1	1|1	1|1	1|1	1|1	1|1	1|1	1|1	1|1	1|1	1|1	2|2	1|1	1|1	1|1	1|1	1|1	1|1	1|1	1|1	1|1	1|1	1|1	1|1	1|1	1|1	1|1	1|1	Y
Cluster345	0|0	0|0	0|0	0|0	0|0	0|0	0|0	0|0	0|0	0|0	0|0	0|0	0|0	0|0	0|0	0|0	0|0	1|1	0|0	0|0	0|0	0|0	0|0	0|0	0|0	0|0	0|0	0|0	0|0	0|0	1|1	0|0	1|1	1|1	1|1	0|0	0|0	0|0	0|0	0|0	0|0	0|0	0|0	0|0	0|0	N
Cluster346	0|0	0|0	0|0	0|0	0|0	0|0	0|0	0|0	0|0	0|0	0|0	0|0	0|0	0|0	0|0	0|0	0|0	0|0	0|0	0|0	0|0	0|0	0|0	0|0	0|0	0|0	0|0	0|0	0|0	0|0	0|0	0|0	0|0	0|0	0|0	0|0	0|0	0|0	0|0	0|0	0|0	0|0	1|1	2|2	1|1	N
Cluster347	1|1	1|1	1|1	1|1	1|1	1|1	1|1	1|1	1|1	1|1	1|1	1|1	1|1	1|1	1|1	1|1	1|1	1|1	1|1	1|1	1|1	1|1	1|1	1|1	1|1	1|1	1|1	1|1	2|2	1|1	1|1	1|1	1|1	1|1	1|1	1|1	1|1	1|1	1|1	1|1	1|1	1|1	1|1	1|1	1|1	Y
Cluster348	1|1	1|1	1|1	1|1	1|1	1|1	1|1	1|1	1|1	1|1	1|1	1|1	1|1	1|1	1|1	1|1	1|1	1|1	1|1	1|1	1|1	1|1	1|1	1|1	0|0	1|1	1|1	1|1	2|2	1|1	1|1	1|1	1|1	1|1	1|1	1|1	1|1	1|1	1|1	1|1	1|1	1|1	0|0	0|0	0|0	Y
Cluster349	1|1	1|1	1|1	1|1	1|1	1|1	1|1	1|1	1|1	1|1	1|1	0|0	0|0	0|0	0|0	0|0	1|1	1|1	1|1	1|1	0|0	1|1	0|0	0|0	1|1	1|1	1|1	1|1	1|1	1|1	1|1	1|1	0|0	1|1	0|0	1|1	1|1	1|1	1|1	1|1	1|1	1|1	0|0	1|1	1|1	N
Cluster350	1|1	0|0	0|0	0|0	0|0	0|0	0|0	0|0	0|0	0|0	0|0	0|0	0|0	0|0	0|0	0|0	0|0	1|1	1|1	1|1	1|1	0|0	0|0	0|0	0|0	1|1	1|1	0|0	1|1	0|0	0|0	0|0	0|0	0|0	0|0	0|0	0|0	0|0	0|0	0|0	0|0	0|0	0|0	0|0	0|0	N
Cluster351	0|0	0|0	0|0	0|0	0|0	0|0	0|0	0|0	0|0	0|0	0|0	1|1	1|1	1|1	1|1	1|1	0|0	0|0	0|0	0|0	0|0	0|0	0|0	1|1	0|0	0|0	0|0	0|0	0|0	0|0	0|0	0|0	1|1	0|0	1|1	0|0	0|0	0|0	0|0	0|0	0|0	0|0	0|0	0|0	0|0	N
Cluster352	0|0	0|0	1|1	0|0	0|0	0|0	0|0	0|0	0|0	0|0	0|0	0|0	0|0	0|0	0|0	0|0	0|0	0|0	0|0	0|0	0|0	0|0	0|0	0|0	0|0	0|0	0|0	0|0	0|0	0|0	0|0	0|0	0|0	0|0	0|0	0|0	0|0	0|0	0|0	0|0	0|0	0|0	0|0	0|0	0|0	N
Cluster353	1|1	0|0	0|0	0|0	0|0	0|0	0|0	0|0	0|0	0|0	0|0	0|0	0|0	0|0	0|0	0|0	0|0	1|1	1|1	1|1	1|1	0|0	0|0	0|0	0|0	1|1	1|1	0|0	1|1	0|1	0|0	1|1	0|0	1|1	0|0	1|1	0|0	0|0	0|0	0|0	0|0	0|0	0|0	0|0	0|0	N
Cluster354	0|0	0|0	0|0	1|1	0|0	0|0	0|0	1|1	1|1	0|0	0|0	2|2	1|1	1|1	1|1	1|1	0|0	0|0	0|0	0|0	0|0	0|0	0|0	0|0	0|0	0|0	0|0	0|0	0|0	0|0	0|0	0|0	0|0	0|0	0|0	0|0	0|0	0|0	1|1	0|0	0|0	0|0	1|1	1|1	1|1	N
Cluster355	1|1	1|1	1|1	1|1	1|1	1|1	1|1	1|1	1|1	1|1	1|1	1|1	1|1	1|1	1|1	1|1	1|1	1|1	1|1	1|1	1|1	1|1	1|1	1|1	1|1	1|1	1|1	1|1	1|1	1|1	0|0	1|1	1|1	1|1	1|1	1|1	1|1	1|1	1|1	1|1	1|1	1|1	1|1	0|1	0|1	Y
Cluster356	1|1	1|1	0|0	1|1	1|1	1|1	1|1	1|1	1|1	1|1	1|1	0|0	0|0	0|0	0|0	0|0	1|1	1|1	1|1	1|1	0|0	0|0	0|0	0|0	0|0	0|0	1|1	0|0	1|1	1|1	1|1	0|0	0|0	1|1	1|1	1|1	1|1	1|1	1|1	1|1	1|1	1|1	1|1	1|1	1|1	N
Cluster357	1|1	1|1	1|1	1|1	1|1	1|1	1|1	1|1	1|1	1|1	1|1	1|1	1|1	1|1	1|1	1|1	1|1	1|1	1|1	1|1	1|1	1|1	1|1	1|1	1|1	1|1	1|1	1|1	1|1	1|1	1|1	1|1	1|1	1|1	1|1	1|1	1|1	1|1	1|1	1|1	1|1	1|1	1|1	1|1	1|1	Y
Cluster358	2|2	0|0	0|0	0|0	0|0	0|0	0|0	0|0	0|0	0|0	0|0	0|0	0|0	0|0	0|0	0|0	0|0	1|1	2|2	0|0	2|2	0|0	0|0	0|0	0|0	1|1	1|1	0|0	0|0	0|0	0|0	0|0	0|0	0|0	0|0	0|0	0|0	0|0	0|0	0|0	0|0	0|0	0|0	0|0	0|0	N
Cluster359	0|0	0|0	1|1	0|0	0|0	0|0	0|0	0|0	0|0	0|0	0|0	0|0	0|0	0|0	0|0	0|0	0|0	0|0	0|0	0|0	0|1	1|1	0|0	0|0	1|1	0|1	0|0	1|1	0|0	0|0	0|0	0|0	0|0	0|0	0|0	0|0	0|0	0|0	0|0	0|0	0|0	0|0	0|0	0|0	0|0	N
Cluster360	0|0	0|0	0|0	0|0	0|0	0|0	0|0	0|0	0|0	0|0	0|0	0|0	0|0	0|0	0|0	0|0	0|0	0|0	0|0	0|0	0|0	0|0	0|0	0|0	0|0	0|0	0|0	0|0	0|0	0|0	0|0	0|0	0|0	0|0	0|0	0|0	0|0	0|0	0|0	2|2	0|0	0|0	0|0	0|0	0|0	N
Cluster361	0|0	1|1	0|0	1|1	1|1	1|1	1|1	1|1	1|1	1|1	1|1	0|0	0|0	0|0	0|0	0|0	0|0	0|0	0|0	0|0	0|0	1|1	0|0	0|0	1|1	0|0	0|0	1|1	0|0	0|0	0|0	0|0	0|0	0|0	0|0	0|0	2|2	1|1	1|1	1|1	1|1	1|1	0|0	0|0	0|0	N
Cluster362	0|0	0|0	0|0	1|1	0|0	0|0	0|0	1|1	1|1	0|0	0|0	0|0	0|0	0|0	0|0	0|0	0|0	0|0	0|0	0|0	0|0	0|0	0|0	0|0	0|0	0|0	0|0	0|0	0|0	0|0	0|0	0|0	0|0	0|0	0|0	0|0	0|0	0|0	0|0	0|0	0|0	0|0	0|0	0|0	0|0	N
Cluster363	1|1	0|0	0|0	0|0	0|0	0|0	0|0	0|0	0|0	0|0	0|0	1|1	1|1	1|1	1|1	1|1	0|0	1|1	1|1	1|1	1|1	0|0	1|1	1|1	0|0	1|1	1|1	0|0	1|1	0|0	0|0	0|0	0|0	0|0	0|0	0|0	0|0	0|0	0|0	0|0	0|0	0|0	2|2	1|1	1|1	N
Cluster364	1|1	1|1	1|1	1|1	1|1	1|1	1|1	1|1	1|1	1|1	1|1	0|0	0|0	0|0	0|0	0|0	1|1	1|1	1|1	1|1	1|1	1|1	0|0	0|0	1|1	1|1	1|1	1|1	1|1	1|1	1|1	0|0	0|0	1|1	1|1	1|1	1|1	1|1	1|1	0|0	1|1	1|1	1|1	1|1	1|1	N
Cluster365	0|0	1|1	0|0	1|1	1|1	1|1	1|1	1|1	1|1	1|1	1|1	0|0	0|0	0|0	0|0	0|0	0|0	0|0	0|0	0|0	0|0	1|1	0|0	0|0	1|1	0|0	0|0	1|1	0|0	1|1	1|1	0|0	0|0	0|0	1|1	0|0	1|1	1|1	1|1	1|1	1|1	2|2	0|0	0|0	1|1	N
Cluster366	0|0	0|0	0|0	0|0	0|0	0|0	0|0	0|0	0|0	0|0	0|0	0|0	0|0	0|0	0|0	0|0	0|0	0|0	0|0	0|0	0|0	0|0	0|0	0|0	0|0	0|0	0|0	0|0	0|0	0|0	0|0	0|0	0|0	0|0	0|0	0|0	0|0	0|0	0|0	0|0	0|0	0|0	2|2	0|0	0|0	N
Cluster367	0|0	1|1	1|1	1|1	1|1	1|1	1|1	1|1	1|1	1|1	1|1	0|0	0|0	0|0	0|0	0|0	1|1	1|1	1|1	0|0	0|0	1|1	0|0	0|0	1|1	0|0	0|0	1|1	0|0	1|1	1|1	0|0	0|0	1|1	1|1	1|1	1|1	1|1	1|1	1|1	1|1	1|1	1|1	1|1	1|1	N
Cluster368	0|0	0|0	0|0	0|0	0|0	0|0	0|0	0|0	0|0	0|0	0|0	2|2	2|2	2|2	2|2	2|2	0|0	0|0	0|0	0|0	0|0	0|0	2|2	2|2	0|0	0|0	0|0	0|0	0|0	0|0	0|0	0|0	1|1	0|0	0|0	0|0	0|0	0|0	0|0	0|0	0|0	0|0	0|0	0|0	0|0	N
Cluster369	0|0	1|1	1|1	1|1	1|1	1|1	1|1	1|1	1|1	1|1	1|1	0|0	0|0	0|0	0|0	0|0	1|1	0|0	0|0	0|0	0|0	1|1	0|0	0|0	1|1	0|0	0|0	1|1	0|0	1|1	1|1	0|0	0|0	1|1	1|1	0|0	1|1	1|1	1|1	1|1	1|1	1|1	0|0	0|0	0|0	N
Cluster370	0|0	1|1	0|0	0|0	0|0	0|0	0|0	0|0	0|0	0|0	0|0	0|0	0|0	0|0	0|0	0|0	1|1	1|1	1|1	1|1	1|1	1|1	0|0	0|0	0|0	1|1	1|1	0|0	1|1	1|1	1|1	1|1	0|0	1|1	1|1	1|1	1|1	1|1	1|1	1|1	1|1	1|1	1|1	2|2	2|2	N
Cluster371	1|1	1|1	0|1	1|1	0|0	0|0	0|0	0|0	1|1	0|0	0|0	0|0	0|0	0|0	0|0	0|0	2|2	1|1	0|0	1|1	1|1	1|1	0|0	0|0	0|0	1|1	1|1	0|0	2|2	0|0	0|0	0|0	0|0	0|0	0|0	1|1	1|1	1|1	1|1	1|1	1|1	1|1	0|0	0|0	0|0	N
Cluster372	1|1	0|0	0|0	0|0	0|0	0|0	0|0	0|0	0|0	0|0	0|0	0|0	0|0	0|0	0|0	0|0	0|0	1|1	1|1	0|0	1|1	0|0	0|0	0|0	0|0	1|1	0|0	0|0	1|1	0|0	1|1	0|0	0|0	0|0	1|1	0|0	0|0	0|0	0|0	0|0	0|0	0|0	1|1	1|1	0|0	N
Cluster373	1|1	1|1	1|1	1|1	1|1	1|1	1|1	1|1	1|1	1|1	1|1	0|0	0|0	0|0	0|0	0|0	1|1	1|1	1|1	1|1	1|1	1|1	0|0	0|0	1|1	1|1	1|1	1|1	1|1	1|1	1|1	0|0	0|0	1|1	0|0	1|1	1|1	1|1	1|1	1|1	1|1	1|1	1|1	1|1	1|1	N
Cluster374	1|1	1|1	1|1	1|1	1|1	1|1	1|1	1|1	1|1	1|1	1|1	0|0	0|0	0|0	0|0	0|0	1|1	1|1	1|1	1|1	1|1	1|1	0|0	0|0	1|1	1|1	1|1	1|1	1|1	1|1	1|1	0|0	0|0	1|1	1|1	1|1	1|1	1|1	1|1	0|0	1|1	1|1	1|1	1|1	1|1	N
Cluster375	1|1	1|1	1|1	1|1	1|1	1|1	1|1	1|1	1|1	1|1	1|1	1|1	1|1	1|1	1|1	1|1	1|1	1|1	1|1	1|1	1|1	1|1	1|1	1|1	1|1	1|1	1|1	1|1	1|1	1|1	1|1	1|1	1|1	1|1	1|1	1|1	1|1	1|1	1|1	1|1	1|1	1|1	0|0	0|0	1|1	Y
Cluster376	1|1	1|1	1|1	1|1	1|1	1|1	1|1	1|1	1|1	1|1	1|1	1|1	1|1	1|1	1|1	1|1	1|1	1|1	1|1	1|1	1|1	1|1	0|0	1|1	1|1	1|1	1|1	1|1	1|1	1|1	1|1	1|1	0|0	1|1	1|1	1|1	1|1	1|1	1|1	1|1	1|1	1|1	1|1	1|1	1|1	Y
Cluster377	1|1	1|1	1|1	1|1	1|1	1|1	1|1	1|1	1|1	1|1	1|1	0|0	0|0	0|0	0|0	0|0	1|1	1|1	1|1	1|1	1|1	1|1	0|0	0|0	1|1	1|1	1|1	1|1	1|1	1|1	1|1	0|0	0|0	1|1	1|1	0|0	1|1	1|1	1|1	1|1	1|1	1|1	1|1	1|1	1|1	N
Cluster378	0|0	0|0	1|1	0|0	0|0	0|0	0|0	0|0	0|0	0|0	0|0	0|0	0|0	0|0	0|0	0|0	0|0	0|0	0|0	0|0	0|0	0|0	0|0	0|0	0|0	0|0	0|0	0|0	0|0	0|0	0|0	0|0	0|0	0|0	0|0	0|0	0|0	0|0	0|0	0|0	0|0	0|0	0|0	0|0	0|0	N
Cluster379	0|0	0|0	1|1	0|0	0|0	0|0	0|0	0|0	0|0	0|0	0|0	0|0	0|0	0|0	0|0	0|0	0|0	0|0	0|0	0|0	0|0	0|0	0|0	0|0	0|0	0|0	0|0	1|1	0|0	0|0	0|0	0|0	0|0	0|0	0|0	0|0	0|0	0|0	0|0	0|0	0|0	0|0	0|0	0|0	0|0	N
Cluster380	1|1	1|1	1|1	1|1	1|1	1|1	1|1	1|1	1|1	1|1	1|1	1|1	1|1	1|1	1|1	1|1	1|1	1|1	1|1	1|1	1|1	1|1	1|1	1|1	1|1	1|1	1|1	1|1	1|1	1|1	1|1	1|1	1|1	1|1	1|1	1|1	1|1	1|1	1|1	1|1	1|1	1|1	1|1	1|1	1|1	Y
Cluster381	0|0	0|0	0|0	0|0	0|0	0|0	0|0	0|0	0|0	0|0	0|0	1|1	1|1	1|1	1|1	1|1	0|0	0|0	0|0	0|0	0|0	0|0	0|0	1|1	0|0	0|0	0|0	0|0	0|0	0|0	0|0	0|0	0|0	0|0	0|0	0|0	0|0	0|0	0|0	0|0	0|0	0|0	0|0	0|0	0|0	N
Cluster382	1|1	1|1	1|1	1|1	1|1	1|1	1|1	1|1	1|1	1|1	1|1	0|0	0|0	0|0	0|0	0|0	1|1	1|1	1|1	1|1	1|1	1|1	0|0	0|0	1|1	1|1	1|1	1|1	1|1	1|1	1|1	1|1	0|0	1|1	1|1	1|1	1|1	1|1	1|1	1|1	1|1	1|1	1|1	0|0	1|1	Y
Cluster383	0|0	0|0	1|1	0|0	0|0	0|0	0|0	0|0	0|0	0|0	0|0	0|0	0|0	0|0	0|0	0|0	0|0	0|0	0|0	0|0	0|0	0|0	0|0	0|0	0|0	0|0	0|0	0|0	0|0	0|0	0|0	0|0	0|0	0|0	0|0	0|0	0|0	0|0	0|0	0|0	0|0	0|0	0|0	0|0	0|0	N
Cluster384	1|1	1|1	1|1	1|1	1|1	1|1	1|1	1|1	1|1	1|1	1|1	1|1	1|1	1|1	1|1	1|1	1|1	1|1	1|1	1|1	0|0	1|1	1|1	1|1	1|1	1|1	1|1	1|1	2|2	1|1	1|1	0|1	1|1	1|1	1|1	1|1	1|1	1|1	1|1	1|1	1|1	1|1	0|0	0|0	1|1	Y
Cluster385	1|1	0|0	0|0	0|0	0|0	0|0	0|0	0|0	0|0	0|0	0|0	0|0	0|0	0|0	0|0	0|0	0|0	1|1	1|1	2|2	1|1	0|0	0|0	0|0	0|0	1|1	1|1	0|0	1|1	0|0	1|1	0|0	0|0	0|0	0|0	0|0	0|0	0|0	0|0	0|0	0|0	0|0	0|0	0|0	0|0	N
Cluster386	1|1	1|1	1|1	1|1	1|1	1|1	1|1	1|1	1|1	1|1	1|1	1|1	1|1	1|1	1|1	1|1	1|1	1|1	1|1	1|1	1|1	1|1	1|1	1|1	1|1	1|1	1|1	1|1	1|1	1|1	1|1	1|1	1|1	1|1	1|1	1|1	1|1	1|1	1|1	1|1	1|1	1|1	1|1	1|1	1|1	Y
Cluster387	1|1	1|1	1|1	1|1	1|1	1|1	1|1	1|1	1|1	1|1	1|1	1|1	1|1	1|1	1|1	1|1	1|1	1|1	1|1	1|1	1|1	1|1	1|1	1|1	1|1	1|1	1|1	1|1	1|1	1|1	1|1	1|1	1|1	0|0	1|1	1|1	1|1	1|1	1|1	1|1	1|1	1|1	1|1	1|1	1|1	Y
Cluster388	0|0	0|0	0|0	0|0	0|0	0|0	0|0	0|0	0|0	0|0	0|0	2|2	2|2	2|2	2|2	2|2	0|0	0|0	0|0	0|0	0|0	0|0	0|0	0|0	0|0	0|0	0|0	0|0	0|0	0|0	0|0	0|0	1|1	0|0	0|0	0|0	0|0	0|0	0|0	0|0	0|0	0|0	0|0	0|0	0|0	N
Cluster389	0|0	0|0	0|0	0|0	0|0	0|0	0|0	0|0	0|0	0|0	0|0	0|0	0|0	0|0	0|0	0|0	0|0	0|0	0|0	0|0	0|0	0|0	0|0	0|0	0|0	0|0	0|0	0|0	0|0	0|0	0|0	0|0	0|0	0|0	0|0	0|0	0|0	0|0	0|0	0|0	0|0	0|0	0|0	2|2	0|0	N
Cluster390	1|1	0|0	0|0	0|0	0|0	0|0	0|0	0|0	0|0	0|0	0|0	0|0	0|0	0|0	0|0	0|0	0|0	1|1	1|1	2|2	1|1	0|0	0|0	0|0	0|0	1|1	1|1	0|0	1|1	1|1	0|0	0|0	0|0	0|0	0|0	0|0	0|0	0|0	0|0	0|0	0|0	0|0	0|0	0|0	0|0	N
Cluster391	0|0	0|0	0|0	0|0	0|0	0|0	0|0	0|0	0|0	0|0	0|0	3|3	2|2	2|2	2|2	2|2	0|0	0|0	0|0	0|0	0|0	0|0	0|0	0|0	0|0	0|0	0|0	0|0	0|0	0|0	0|0	0|0	0|0	0|0	0|0	0|0	0|0	0|0	0|0	0|0	0|0	0|0	0|0	0|0	0|0	N
Cluster392	1|1	0|0	0|0	0|0	0|0	0|0	0|0	0|0	0|0	0|0	0|0	0|0	0|0	0|0	0|0	0|0	0|0	1|1	1|1	1|1	1|1	0|0	1|1	0|0	0|0	1|1	1|1	0|0	1|1	0|0	0|0	0|0	0|0	0|0	0|0	0|0	0|0	0|0	0|0	0|0	0|0	0|0	0|0	0|0	0|0	N
Cluster393	1|1	1|1	1|1	1|1	1|1	1|1	1|1	1|1	1|1	1|1	1|1	0|0	0|0	0|0	0|0	0|0	1|1	1|1	1|1	0|0	1|1	1|1	0|0	0|0	1|1	1|1	0|0	1|1	1|1	1|1	1|1	0|0	0|0	1|1	1|1	1|1	1|1	1|1	1|1	1|1	1|1	1|1	1|1	1|1	1|1	N
Cluster394	1|1	0|1	0|1	0|1	0|1	0|1	0|1	0|1	0|1	0|1	0|1	1|1	1|1	1|1	1|1	1|1	0|1	1|1	1|1	1|1	1|1	0|1	1|1	1|1	0|1	1|1	1|1	0|1	1|1	0|1	0|0	0|0	1|1	0|1	1|1	0|1	0|1	0|1	0|1	0|1	0|1	0|1	1|1	1|1	1|1	N
Cluster395	1|1	1|1	1|1	1|1	1|1	1|1	1|1	1|1	1|1	1|1	1|1	1|1	1|1	1|1	1|1	1|1	1|1	1|1	1|1	1|1	1|1	1|1	1|1	1|1	1|1	1|1	1|1	1|1	1|1	1|1	1|1	1|1	1|1	1|1	1|1	1|1	1|1	1|1	1|1	1|1	1|1	1|1	1|1	1|1	1|1	Y
Cluster396	0|0	1|1	2|2	2|2	2|2	1|1	2|2	2|2	2|2	1|1	1|1	0|0	0|0	0|0	0|0	0|0	0|0	0|0	0|0	0|0	0|0	2|2	0|0	0|0	1|1	0|0	0|0	1|1	0|0	0|0	0|0	0|0	0|0	1|1	1|1	0|0	1|1	1|1	1|1	1|1	1|1	1|1	1|1	1|1	1|1	N
Cluster397	0|0	0|0	0|0	0|0	0|0	0|0	0|0	0|0	0|0	0|0	0|0	0|0	0|0	0|0	0|0	0|0	0|0	0|0	0|0	0|0	0|0	0|0	0|0	0|0	0|0	0|0	0|0	0|0	0|0	0|0	0|0	0|0	0|0	0|0	0|1	0|0	0|0	0|0	0|0	0|0	0|0	0|0	0|0	0|0	0|0	N
Cluster398	0|0	1|1	0|0	1|1	1|1	1|1	1|1	1|1	1|1	1|1	1|1	0|0	0|0	0|0	0|0	0|0	1|1	0|0	0|0	0|0	0|0	1|1	0|0	0|0	1|1	0|0	0|0	1|1	0|0	0|0	1|1	0|0	0|0	0|0	0|0	0|0	1|1	1|1	1|1	3|3	1|1	1|1	1|2	0|0	1|1	N
Cluster399	0|0	0|0	0|0	1|1	0|0	0|0	0|0	0|0	1|1	0|0	0|0	0|0	0|0	0|0	0|0	0|0	2|2	0|0	0|0	0|0	0|0	1|1	0|0	0|0	0|0	0|0	0|0	0|0	0|0	0|0	0|0	0|0	0|0	0|0	0|0	0|0	0|0	0|0	1|1	0|0	1|1	0|0	0|0	0|0	0|0	N
Cluster400	1|1	1|1	1|1	1|1	1|1	1|1	1|1	1|1	1|1	1|1	1|1	0|0	0|0	0|0	0|0	0|0	1|1	1|1	1|1	0|0	1|1	1|1	1|1	0|0	1|1	1|1	0|0	1|1	1|1	1|1	0|0	1|1	0|0	1|1	1|1	1|1	1|1	1|1	1|1	1|1	1|1	1|1	0|1	0|1	0|1	N
Cluster401	1|1	1|1	1|1	1|1	1|1	1|1	1|1	1|1	1|1	1|1	1|1	0|0	0|0	0|0	0|0	0|0	1|1	1|1	1|1	1|1	1|1	1|1	0|0	0|0	1|1	1|1	1|1	1|1	1|1	1|1	1|1	1|1	0|0	1|1	1|1	1|1	1|1	1|1	1|1	0|0	1|1	1|1	1|1	1|1	1|1	Y
Cluster402	1|1	1|1	1|1	1|1	1|1	1|1	1|1	1|1	1|1	1|1	1|1	1|1	1|1	1|1	1|1	1|1	1|1	1|1	1|1	1|1	1|1	1|1	1|1	1|1	1|1	1|1	1|1	1|1	1|1	1|1	1|1	1|1	1|1	1|1	1|1	1|1	1|1	1|1	1|1	1|1	1|1	1|1	1|1	1|1	1|1	Y
Cluster403	1|1	1|1	1|1	1|1	1|1	1|1	1|1	1|1	1|1	1|1	1|1	0|0	0|0	0|0	0|0	0|0	1|1	1|1	1|1	1|1	1|1	1|1	1|1	1|1	1|1	1|1	1|1	1|1	2|2	1|1	1|1	1|1	0|0	1|1	1|1	1|1	1|1	1|1	1|1	1|1	1|1	1|1	1|1	1|1	1|1	Y
Cluster404	1|1	1|1	1|1	1|1	1|1	1|1	1|1	1|1	1|1	1|1	1|1	0|0	0|0	0|0	0|0	0|0	1|1	1|1	1|1	0|0	1|1	1|1	0|0	0|0	1|1	1|1	0|0	1|1	1|1	0|0	1|1	0|0	1|1	1|1	1|1	1|1	1|1	1|1	1|1	1|1	1|1	1|1	0|0	0|0	0|0	N
Cluster405	1|1	1|1	1|1	1|1	1|1	1|1	1|1	1|1	1|1	1|1	1|1	0|0	0|0	0|0	0|0	0|0	1|1	1|1	1|1	1|1	1|1	1|1	0|0	0|0	1|1	1|1	1|1	1|1	1|1	1|1	1|1	1|1	0|0	1|1	1|1	1|1	1|1	1|1	1|1	1|1	1|1	1|1	1|1	1|1	1|1	Y
Cluster406	0|0	0|0	0|0	0|0	0|0	0|0	0|0	0|0	0|0	0|0	0|0	0|0	0|0	0|0	0|0	0|0	0|0	0|0	0|0	0|0	0|0	0|0	0|0	0|0	0|0	0|0	0|0	0|0	0|0	0|0	0|0	0|0	0|0	0|0	0|0	0|0	0|0	0|0	0|0	1|1	0|0	0|0	0|0	0|0	0|0	N
Cluster407	1|1	1|1	1|1	1|1	1|1	1|1	1|1	1|1	1|1	1|1	1|1	1|1	1|1	1|1	1|1	1|1	1|1	1|1	1|1	1|1	1|1	1|1	1|1	1|1	1|1	1|1	1|1	1|1	1|1	1|1	1|1	1|1	1|1	1|1	1|1	1|1	1|1	1|1	1|1	1|1	1|1	1|1	1|1	1|1	1|1	Y
Cluster408	1|1	1|1	1|1	1|1	1|1	1|1	1|1	1|1	1|1	1|1	1|1	1|1	1|1	1|1	1|1	1|1	1|1	1|1	1|1	1|1	1|1	1|1	1|1	1|1	1|1	1|1	1|1	1|1	1|1	1|1	1|1	1|1	1|1	1|1	1|1	1|1	1|1	1|1	1|1	1|1	1|1	1|1	1|1	1|1	1|1	Y
Cluster409	1|1	1|1	0|0	1|1	1|1	1|1	1|1	1|1	1|1	1|1	1|1	1|1	1|1	1|1	1|1	1|1	1|1	1|1	1|1	1|1	1|1	1|1	1|1	1|1	1|1	1|1	1|1	1|1	1|1	1|1	1|1	1|1	1|1	1|1	1|1	1|1	1|1	1|1	1|1	2|2	1|1	1|1	1|1	1|1	1|1	Y
Cluster410	1|1	1|1	0|1	0|0	0|0	0|0	0|0	0|0	0|0	0|0	0|0	0|0	0|0	0|0	0|0	0|0	0|0	2|2	1|1	0|0	1|1	1|1	0|0	0|0	0|0	1|1	0|0	0|0	1|1	0|0	0|0	0|0	0|0	0|0	0|0	0|0	0|0	0|0	0|0	0|0	0|0	1|1	0|0	0|0	0|0	N
Cluster411	0|0	0|0	0|0	0|0	1|1	1|1	0|0	0|0	0|0	0|0	1|1	0|0	0|0	0|0	0|0	0|0	1|1	0|0	0|0	0|0	0|0	0|0	0|0	0|0	1|1	0|0	0|0	0|0	0|0	0|0	0|0	0|0	0|0	0|0	0|0	0|0	0|0	0|0	0|0	1|1	0|0	0|0	0|0	0|0	0|0	N
Cluster412	0|0	0|0	0|0	0|0	0|0	0|0	0|0	0|0	0|0	0|0	0|0	0|0	0|0	0|0	0|0	0|0	0|0	0|0	0|0	0|0	0|0	0|0	0|0	0|0	0|0	0|0	0|0	0|0	0|0	0|0	0|0	0|0	0|0	0|0	0|0	0|0	0|0	0|0	0|0	2|2	0|0	0|0	0|0	0|0	0|0	N
Cluster413	0|0	0|0	0|0	1|1	0|0	1|1	1|1	1|1	1|1	1|1	0|0	0|0	0|0	0|0	0|0	0|0	3|3	0|0	0|0	0|0	0|0	0|0	0|0	0|0	0|0	0|0	0|0	0|0	0|0	0|0	0|0	0|0	0|0	0|0	0|0	0|0	1|1	1|1	1|1	1|1	1|1	0|0	0|0	0|0	0|0	N
Cluster414	0|0	0|0	0|0	0|0	0|0	0|0	0|0	0|0	0|0	0|0	0|0	0|0	0|0	0|0	0|0	0|0	0|0	0|0	0|0	0|0	0|0	0|0	0|0	0|0	1|1	0|0	0|0	0|0	0|0	0|0	0|0	0|0	0|0	0|0	0|0	0|0	0|0	0|0	0|0	0|0	0|0	0|0	0|0	0|0	0|0	N
Cluster415	1|1	1|1	0|0	1|1	1|1	1|1	1|1	1|1	1|1	1|1	1|1	0|0	0|0	0|0	0|0	0|0	1|1	1|1	1|1	1|1	1|1	1|1	0|0	0|0	1|1	1|1	1|1	1|1	1|1	0|0	0|0	0|0	0|0	0|0	0|0	0|0	1|1	1|1	1|1	2|2	1|1	1|1	1|1	0|0	0|0	N
Cluster416	0|0	0|0	0|0	0|0	0|0	0|0	0|0	0|0	0|0	0|0	0|0	0|0	0|0	0|0	0|0	0|0	0|0	0|0	0|0	0|0	0|0	0|0	0|0	0|0	0|0	0|0	0|0	0|0	0|0	0|0	0|0	0|0	0|0	0|0	0|0	0|0	0|0	0|0	0|0	2|2	0|0	0|0	0|0	0|0	0|0	N
Cluster417	1|1	1|1	0|0	1|1	1|1	1|1	1|1	1|1	1|1	1|1	1|1	1|1	1|1	1|1	1|1	1|1	1|1	1|1	1|1	1|1	1|1	1|1	1|1	1|1	1|1	1|1	1|1	1|1	1|1	1|1	1|1	1|1	1|1	1|1	1|1	1|1	1|1	1|1	1|1	2|2	1|1	1|1	1|1	1|1	0|0	Y
Cluster418	0|0	0|0	0|0	0|0	0|0	0|0	0|0	0|0	0|0	0|0	0|0	0|0	0|0	0|0	0|0	0|0	0|0	0|0	0|0	0|0	1|1	0|0	0|0	0|0	0|0	0|0	0|0	0|0	0|0	0|0	0|0	0|0	0|0	0|0	0|0	0|0	0|0	0|0	0|0	0|0	0|0	0|0	0|0	0|0	0|0	N
Cluster419	1|1	1|1	0|1	1|1	1|1	1|1	1|1	1|1	1|1	1|1	1|1	0|0	0|0	0|0	0|0	0|0	3|3	1|1	1|1	1|1	1|1	1|1	0|0	0|0	1|1	1|1	1|1	1|1	1|1	1|1	1|1	0|0	0|0	1|1	0|0	0|0	1|1	1|1	1|1	0|1	1|1	1|1	0|0	0|0	1|1	N
Cluster420	1|1	1|1	1|1	1|1	1|1	1|1	1|1	1|1	1|1	1|1	1|1	1|1	1|1	1|1	1|1	1|1	1|1	1|1	1|1	1|1	1|1	1|1	1|1	1|1	1|1	1|1	1|1	1|1	1|1	1|1	1|1	1|1	1|1	1|1	1|1	1|1	1|1	1|1	1|1	1|1	1|1	1|1	1|1	1|1	1|1	Y
Cluster421	1|1	1|1	1|1	1|1	1|1	1|1	1|1	1|1	1|1	1|1	1|1	1|1	1|1	1|1	1|1	1|1	1|1	1|1	1|1	1|1	1|1	1|1	0|1	0|1	1|1	1|1	1|1	1|1	1|1	1|1	1|1	0|1	0|1	1|1	1|1	1|1	1|1	1|1	1|1	1|1	1|1	1|1	1|1	1|1	1|1	Y
Cluster422	0|0	1|1	0|0	1|1	1|1	1|1	1|1	1|1	1|1	1|1	1|1	3|3	2|2	2|2	2|2	2|2	2|2	0|0	0|0	0|0	0|0	1|1	0|0	0|0	1|1	0|0	0|0	1|1	0|0	0|0	0|0	0|0	1|1	1|1	0|0	0|0	1|1	1|1	1|1	1|1	1|1	1|1	0|0	0|0	0|0	N
Cluster423	0|0	0|0	1|1	0|0	0|0	0|0	0|0	0|0	0|0	0|0	0|0	0|0	0|0	0|0	0|0	0|0	0|0	0|0	0|0	0|0	0|0	0|0	0|0	0|0	0|0	0|0	0|0	0|0	0|0	0|0	0|0	0|0	0|0	0|0	0|0	0|0	0|0	0|0	0|0	0|0	0|0	0|0	0|0	0|0	0|0	N
Cluster424	0|0	0|0	0|0	0|0	0|0	0|0	0|0	0|0	0|0	0|0	0|0	0|0	0|0	0|0	0|0	0|0	0|0	0|0	0|0	0|0	0|0	0|0	0|0	0|0	0|0	0|0	0|0	0|0	0|0	0|0	1|1	0|0	0|0	0|0	0|0	0|0	0|0	0|0	0|0	2|2	0|0	0|0	0|0	0|0	0|0	N
Cluster425	1|1	1|1	1|1	1|1	1|1	1|1	1|1	1|1	1|1	1|1	1|1	0|0	0|0	0|0	0|0	0|0	1|1	1|1	1|1	1|1	1|1	1|1	0|0	0|0	1|1	1|1	1|1	1|1	1|1	1|1	1|1	1|1	0|0	1|1	1|1	1|1	1|1	1|1	1|1	1|1	1|1	1|1	1|1	1|1	1|1	Y
Cluster426	0|0	0|0	0|0	0|0	0|0	0|0	0|0	0|0	0|0	0|0	0|0	0|0	0|0	0|0	0|0	0|0	0|0	0|0	0|0	0|0	0|0	0|0	0|0	0|0	0|0	0|0	0|0	0|0	0|0	0|0	0|0	0|0	0|0	0|0	1|1	0|0	0|0	0|0	0|0	0|0	0|0	0|0	0|0	0|0	0|0	N
Cluster427	0|0	1|1	1|1	1|1	1|1	1|1	1|1	1|1	1|1	1|1	1|1	0|0	0|0	0|0	0|0	0|0	1|1	0|0	0|0	0|0	0|0	1|1	0|0	0|0	1|1	0|0	0|0	1|1	0|0	0|0	0|0	0|0	0|0	0|0	0|0	0|0	1|1	1|1	1|1	1|1	1|1	1|1	0|0	0|0	0|0	N
Cluster428	0|0	0|0	0|0	0|0	0|0	0|0	0|0	0|0	0|0	0|0	0|0	1|1	1|1	1|1	1|1	1|1	0|0	0|0	0|0	0|0	0|0	0|0	1|1	1|1	0|0	0|0	0|0	0|0	0|0	0|0	0|0	0|0	1|1	0|0	0|0	0|0	0|0	0|0	0|0	2|2	0|0	0|0	0|0	0|0	0|0	N
Cluster429	0|0	1|1	1|1	1|1	1|1	1|1	1|1	1|1	1|1	1|1	1|1	0|0	0|0	0|0	0|0	0|0	1|1	1|1	1|1	1|1	1|1	1|1	0|0	0|0	1|1	1|1	1|1	0|0	1|1	0|1	1|1	0|0	0|0	0|1	1|1	1|1	1|1	1|1	1|1	1|1	1|1	1|1	1|1	1|1	1|1	N
Cluster430	0|0	0|0	0|0	0|0	0|0	0|0	0|0	0|0	0|0	0|0	0|0	0|0	0|0	0|0	0|0	0|0	0|0	0|0	0|0	0|0	0|0	0|0	0|0	0|0	0|0	0|0	0|0	0|0	0|0	0|0	0|0	0|0	0|0	0|0	1|1	0|0	0|0	0|0	0|0	0|0	0|0	0|0	1|1	0|0	0|0	N
Cluster431	0|0	1|1	1|1	1|1	1|1	1|1	1|1	1|1	1|1	1|1	1|1	1|1	1|1	1|1	1|1	1|1	0|0	0|0	0|0	1|1	0|0	1|1	1|1	1|1	1|1	0|0	1|1	1|1	0|0	1|1	1|1	1|1	1|1	1|1	1|1	1|1	1|1	1|1	1|1	1|1	1|1	1|1	0|0	0|0	0|0	N
Cluster432	0|0	1|1	1|1	1|1	1|1	0|0	1|1	1|1	1|1	0|0	1|1	0|0	0|0	0|0	0|0	0|0	0|0	0|0	0|0	0|0	0|0	1|1	0|0	0|0	1|1	0|0	0|0	1|1	0|0	0|0	0|0	0|0	0|0	0|0	0|0	0|0	1|1	1|1	1|1	0|0	1|1	1|1	1|1	0|0	0|0	N
Cluster433	0|0	0|0	0|0	0|0	0|0	0|0	0|0	0|0	0|0	0|0	0|0	0|0	0|0	0|0	0|0	0|0	0|0	0|0	0|0	0|0	0|0	0|0	0|0	0|0	0|0	0|0	0|0	0|0	0|0	0|0	0|0	0|0	1|1	0|0	0|0	0|0	0|0	0|0	0|0	0|0	0|0	0|0	0|0	0|0	0|0	N
Cluster434	0|0	0|0	0|0	0|0	0|0	0|0	0|0	0|0	0|0	0|0	0|0	0|0	0|0	0|0	0|0	0|0	0|0	0|0	0|0	0|0	0|0	0|0	0|0	0|0	0|0	0|0	0|0	0|0	0|0	0|0	0|0	0|0	0|0	0|0	0|0	1|1	0|0	0|0	0|0	0|0	0|0	0|0	0|0	0|0	0|0	N
Cluster435	0|0	1|1	0|0	1|1	0|0	0|0	0|0	0|0	1|1	0|0	0|0	0|0	0|0	0|0	0|0	0|0	1|1	0|0	1|1	0|0	0|0	1|1	0|0	0|0	0|0	0|0	0|0	0|0	0|0	0|0	0|0	0|0	0|0	0|0	0|0	0|0	1|1	1|1	1|1	0|0	1|1	0|0	0|0	0|0	0|0	N
Cluster436	0|0	0|0	0|0	0|0	0|0	0|0	0|0	0|0	0|0	0|0	0|0	0|0	0|0	0|0	0|0	0|0	0|0	0|0	0|0	0|0	0|0	0|0	0|0	0|0	0|0	0|0	0|0	0|0	0|0	0|0	0|0	0|0	0|0	0|0	0|0	0|0	0|0	0|0	0|0	1|1	0|0	0|0	0|0	0|0	0|0	N
Cluster437	1|1	0|0	0|1	0|0	0|0	0|0	0|0	0|0	0|0	0|0	0|0	0|0	0|0	0|0	0|0	0|0	0|0	0|0	0|0	0|0	1|1	1|1	0|0	0|0	0|0	0|0	0|0	0|0	0|0	0|0	0|0	0|0	0|0	0|0	0|0	1|1	1|1	1|1	1|1	0|0	0|0	0|0	0|0	0|0	1|1	N
Cluster438	0|0	1|1	0|1	1|1	0|0	0|0	0|0	0|0	1|1	0|0	0|0	0|0	0|0	0|0	0|0	0|0	2|2	1|1	0|0	0|0	0|0	1|1	0|0	0|0	0|0	0|0	0|0	0|0	0|0	0|0	0|0	0|0	0|0	0|0	0|0	0|0	1|1	1|1	1|1	0|0	1|1	1|1	0|0	0|0	0|0	N
Cluster439	1|1	0|0	0|0	0|0	0|0	0|0	0|0	0|0	0|0	0|0	0|0	0|0	0|0	0|0	0|0	0|0	0|0	1|1	1|1	0|0	1|1	0|0	0|0	0|0	0|0	0|0	0|0	0|0	0|0	0|0	0|0	0|0	0|0	0|0	0|0	0|0	0|0	0|0	0|0	0|0	0|0	0|0	0|0	0|0	0|0	N
Cluster440	0|0	0|0	0|0	0|0	0|0	0|0	0|0	0|0	0|0	0|0	0|0	0|0	0|0	0|0	0|0	0|0	0|0	0|0	0|0	1|1	0|0	1|1	0|0	0|0	0|0	0|0	1|1	0|0	0|0	0|0	0|0	0|0	0|0	0|0	0|0	0|0	1|1	1|1	0|0	0|0	0|0	0|0	0|0	0|0	0|0	N
Cluster441	0|0	0|0	0|1	1|1	1|1	1|1	0|0	0|0	1|1	0|0	0|0	1|1	0|0	0|0	0|0	0|0	0|0	0|0	0|0	0|0	0|0	1|1	0|0	0|0	0|0	0|0	0|0	0|0	0|0	0|0	0|0	0|0	0|0	0|0	0|0	0|0	0|0	0|0	1|1	1|1	0|0	1|1	0|0	1|1	0|0	N
Cluster442	0|0	1|1	1|1	1|1	1|1	0|0	0|0	0|0	0|0	0|0	0|0	0|0	0|0	0|0	0|0	0|0	1|1	0|0	0|0	0|0	0|0	1|1	0|0	0|0	0|0	0|0	0|0	0|0	0|0	0|0	0|0	0|0	0|0	0|0	0|0	0|0	1|1	1|1	1|1	1|1	1|1	1|1	0|0	0|0	0|0	N
Cluster443	0|0	0|0	0|0	0|0	0|0	0|0	0|0	0|0	0|0	0|0	0|0	0|0	0|0	0|0	0|0	0|0	0|0	0|0	0|0	0|0	0|0	0|0	0|0	0|0	0|0	0|0	0|0	0|0	0|0	0|0	0|0	1|1	0|0	0|0	0|0	0|0	0|0	0|0	0|0	0|0	0|0	0|0	0|0	0|0	0|0	N
Cluster444	0|0	1|1	1|1	1|1	1|1	1|1	1|1	1|1	1|1	1|1	1|1	1|1	1|1	1|1	1|1	1|1	1|1	0|0	0|0	0|0	0|0	1|1	1|1	1|1	0|0	0|0	0|0	1|1	0|0	1|1	1|1	1|1	1|1	1|1	1|1	1|1	1|1	1|1	1|1	1|1	1|1	1|1	1|1	1|1	1|1	Y
Cluster445	0|0	0|0	0|0	0|0	0|0	0|0	0|0	0|0	0|0	0|0	0|0	0|0	0|0	0|0	0|0	0|0	0|0	0|0	0|0	0|0	0|0	0|0	0|0	0|0	0|0	0|0	0|0	0|0	0|0	0|0	0|0	0|0	0|0	0|0	0|0	0|0	0|0	0|0	0|0	1|1	0|0	0|0	0|0	0|0	0|0	N
Cluster446	0|0	1|1	1|1	1|1	1|1	1|1	1|1	1|1	1|1	1|1	1|1	1|1	1|1	1|1	1|1	1|1	1|1	0|0	0|0	0|0	0|0	1|1	0|0	1|1	1|1	0|0	0|0	1|1	0|0	0|0	0|0	0|0	1|1	0|0	1|1	0|0	1|1	1|1	1|1	1|1	1|1	1|1	1|1	1|1	0|0	N
Cluster447	0|0	1|1	1|1	0|0	0|0	0|0	0|0	0|0	0|0	0|0	0|0	0|0	0|0	0|0	0|0	0|0	0|0	0|0	0|0	0|0	0|0	1|1	0|0	0|0	0|0	0|0	0|0	0|0	0|0	0|0	0|0	0|0	0|0	0|0	0|0	0|0	1|1	1|1	1|1	0|0	1|1	1|1	0|0	0|0	0|0	N
Cluster448	0|0	1|1	1|1	0|0	0|0	0|0	0|0	0|0	0|0	0|0	0|0	0|0	0|0	0|0	0|0	0|0	1|1	0|0	0|0	0|0	0|0	1|1	0|0	0|0	0|0	0|0	0|0	0|0	0|0	0|0	0|0	0|0	0|0	0|0	0|0	0|0	1|1	1|1	1|1	0|0	1|1	1|1	0|0	0|0	0|0	N
Cluster449	0|0	1|1	0|1	0|0	0|0	0|0	0|0	0|0	0|0	0|0	0|0	0|0	0|0	0|0	0|0	0|0	1|1	0|0	0|0	0|0	0|0	1|1	0|0	0|0	0|0	0|0	0|0	0|0	0|0	0|0	0|0	0|0	0|0	0|0	0|0	0|0	1|1	1|1	1|1	0|0	1|1	1|1	0|0	0|0	0|0	N
Cluster450	0|0	1|1	0|0	1|1	1|1	0|0	0|0	0|0	0|0	0|0	0|0	0|0	0|0	0|0	0|0	0|0	0|0	0|0	1|1	0|0	0|0	1|1	0|0	0|0	1|1	0|0	0|0	0|0	0|0	0|0	1|1	0|0	0|0	0|0	1|1	0|0	1|1	1|1	0|0	0|0	1|1	1|1	1|1	0|0	0|0	N
Cluster451	0|0	0|0	1|1	1|1	0|0	0|0	0|0	0|0	1|1	0|0	0|0	0|0	0|0	0|0	0|0	0|0	0|0	0|0	0|0	0|0	0|0	0|0	0|0	0|0	0|0	0|0	0|0	0|0	0|0	0|0	0|0	0|0	0|0	0|0	0|0	0|0	0|0	0|0	0|0	0|0	0|0	0|0	0|0	0|0	0|0	N
Cluster452	0|0	0|0	0|0	0|0	0|0	0|0	0|0	0|0	0|0	0|0	0|0	0|0	0|0	0|0	0|0	0|0	0|0	0|0	0|0	0|0	0|0	0|0	0|0	0|0	0|0	0|0	0|0	0|0	0|0	0|0	0|0	1|1	0|0	0|0	0|0	0|0	0|0	0|0	2|2	0|0	0|0	0|0	0|0	0|0	0|0	N
Cluster453	0|0	0|0	0|0	0|0	0|0	0|0	0|0	0|0	0|0	0|0	0|0	0|0	0|0	0|0	0|0	0|0	0|0	0|0	0|0	0|0	0|0	0|0	0|0	0|0	0|0	0|0	0|0	0|0	0|0	0|0	0|0	0|0	0|0	0|0	0|0	0|0	0|0	0|0	0|0	1|1	0|0	0|0	0|0	0|0	0|0	N
Cluster454	0|0	0|0	0|0	0|0	0|0	0|0	0|0	0|0	0|0	0|0	0|0	0|0	0|0	0|0	0|0	0|0	0|0	1|1	1|1	0|0	0|0	0|0	0|0	0|0	0|0	0|0	0|0	0|0	0|0	0|0	0|0	0|0	0|0	0|0	0|0	0|0	0|0	0|0	0|0	0|0	0|0	0|0	0|0	0|0	0|0	N
Cluster455	0|0	1|1	1|1	1|1	1|1	1|1	1|1	1|1	1|1	1|1	1|1	0|0	0|0	0|0	0|0	0|0	0|0	0|0	0|0	0|0	0|0	1|1	0|0	0|0	0|0	0|0	0|0	1|1	0|0	0|0	1|1	0|0	0|0	0|0	0|0	0|0	1|1	1|1	1|1	0|0	1|1	1|1	0|0	0|0	0|0	N
Cluster456	0|0	0|0	1|1	0|0	0|0	0|0	0|0	0|0	0|0	0|0	0|0	0|0	0|0	0|0	0|0	0|0	0|0	0|0	0|0	0|0	0|0	0|0	0|0	0|0	0|0	0|0	0|0	0|0	0|0	0|0	0|0	0|0	0|0	0|0	0|0	0|0	0|0	0|0	0|0	0|0	0|0	0|0	0|0	0|0	0|0	N

## Sheet: Table S3
Table S3. The percentages of ASFV gene clusters in each subcellular location group.
Subcellular Location	Number	Percentage
Capsid	43	0.094
Cytoplasm	26	0.057
Single-Pass Membrane	200	0.438
Multi-Pass Membrane	82	0.179
Nucleus	21	0.046
Host nucleus. Host cytoplasm.	34	0.074
Host nucleus › host nucleolus. Host cytoplasm. Secreted.	30	0.066
Extracell[Secreted, Extracellular]	7	0.015
Others-Single	14	0.031

## Sheet: Table S4
Table S4. Genes with evidence for positive selection.
Strain Name	GenBank ID (Strain)	GenBank ID (Gene)	GeneName	Tajima's D	CLR	Pi	Theta
Benin_1997	AM712239	CAN10100.1	Structural protein p22	-1.67837	20.6917	0.0619741	0.121741
Benin_1997	AM712239	CAN10106.1	MGF 110-12L	-1.87125	28.4019	0.120496	0.227706
Benin_1997	AM712239	CAN10107.1	MGF 110-13L	-2.15287	181.84	0.0954456	0.243386
Benin_1997	AM712239	CAN10108.1	MGF 110-14	-2.23105	307.102	0.0737715	0.189007
Benin_1997	AM712239	CAN10109.1	MGF 360-4L	-1.8875	226.42	0.0752923	0.160639
Benin_1997	AM712239	CAN10110.1	MGF 360-6L	-2.12643	249.725	0.0832557	0.214021
Benin_1997	AM712239	CAN10112.1	MGF 300-1L	-1.90605	36.0566	0.0658776	0.141101
Benin_1997	AM712239	CBW46669.1	ASFV_G_ACD_00270	-1.96496	440.165	0.0731035	0.151759
Benin_1997	AM712239	CBW46826.1	ASFV_G_ACD_01960	-1.85567	18.6064	0.103529	0.201416
Benin_1997	AM712239	AIY22367.1		-1.97368	181.84	0.111329	0.227706
Benin_1997	AM712239	QGM12679.1		-2.12643	249.725	0.0832547	0.214021
Benin_1997	AM712239	QGM12801.1		-1.88809	277.171	0.0752923	0.15708
Portugal_OURT_88.3_1988	AM712240	CAN10351.1	MGF 360-2L	-1.62621	13.4523	0.118358	0.209484
Portugal_OURT_88.3_1988	AM712240	CAN10353.1	pL83L	-1.55293	31.3169	0.0756853	0.133897
Portugal_OURT_88.3_1988	AM712240	CAN10356.1	MGF 110-1L	-1.70955	10.5217	0.0881457	0.158763
Portugal_OURT_88.3_1988	AM712240	CBW46669.1	ASFV_G_ACD_00270	-1.89757	232.111	0.0959938	0.208236
Portugal_OURT_88.3_1988	AM712240	QGM12668.1		-1.70955	10.5217	0.0881457	0.158763
Portugal_OURT_88.3_1988	AM712240	QGM12669.1		-1.5165	41.4944	0.0867123	0.149842
Portugal_OURT_88.3_1988	AM712240	QGM12790.1		-1.55293	31.3169	0.0756853	0.133897
Portugal_OURT_88.3_1988	AM712240	QGM12801.1		-1.55436	189.736	0.0895682	0.155922
Kenya_1950	AY261360	CBW46645.1		-1.70922	10.6215	0.0616626	0.122878
Kenya_1950	AY261360	CBW46658.1	ASFV_G_ACD_00160, partial	-2.08443	20.9721	0.087491	0.187413
Kenya_1950	AY261360	CBW46663.1	ASFV_G_ACD_00210	-1.48103	2.85422	0.119551	0.192681
Kenya_1950	AY261360	CBW46821.1		-1.72989	16.5736	0.0954744	0.168639
Kenya_1950	AY261360	AJZ77135.1		-2.16663	215.593	0.0803595	0.216585
Kenya_1950	AY261360	AJL34170.1		-1.63544	21.0052	0.0483115	0.0701579
Kenya_1950	AY261360	AIY22367.1		-1.91348	2.70141	0.111131	0.247043
Kenya_1950	AY261360	AXB49217.1	p01990-1R	-1.54705	4.73757	0.22194	0.377858
Malawi_Lil_1983	AY261361	CAN10110.1	MGF 360-6L	-2.0131	182.147	0.0953152	0.213458
Malawi_Lil_1983	AY261361	CBW46645.1		-1.72094	15.0737	0.063169	0.123874
Malawi_Lil_1983	AY261361	CBW46669.1	ASFV_G_ACD_00270	-2.22071	355.461	0.0678204	0.157956
Malawi_Lil_1983	AY261361	AJZ77135.1		-2.07343	15.1038	0.100998	0.229227
Malawi_Lil_1983	AY261361	AJL34011.1		-1.56102	17.9218	0.0745816	0.13805
Malawi_Lil_1983	AY261361	AXZ95788.1		-1.71569	205.42	0.0761574	0.145879
Malawi_Lil_1983	AY261361	AXB49217.1	p01990-1R	-1.79438	3.39885	0.168067	0.258907
South_Africa_MGR_Mkuzi_1979	AY261362	CAN10110.1	MGF 360-6L	-2.01821	21.3706	0.0915132	0.215901
South_Africa_MGR_Mkuzi_1979	AY261362	CBW46645.1		-1.6768	12.6114	0.0652678	0.124184
South_Africa_MGR_Mkuzi_1979	AY261362	CBW46669.1	ASFV_G_ACD_00270	-1.97156	419.405	0.0750986	0.156273
South_Africa_MGR_Mkuzi_1979	AY261362	CBW46821.1		-2.08898	22.257	0.0728434	0.186207
South_Africa_MGR_Mkuzi_1979	AY261362	AJZ77135.1		-2.23451	38.1326	0.100879	0.248147
South_Africa_MGR_Mkuzi_1979	AY261362	AXZ95786.1		-1.85403	116.17	0.104114	0.198123
South_Africa_MGR_Mkuzi_1979	AY261362	AXZ95788.1		-1.96755	31.9893	0.0749073	0.161782
South_Africa_MGR_Mkuzi_1979	AY261362	QGM12667.1		-1.66305	220.49	0.0781425	0.141083
South_Africa_MGR_Mkuzi_1979	AY261362	QGM12679.1		-2.01821	21.3706	0.0896301	0.21459
South_Africa_MGR_Mkuzi_1979	AY261362	QGM12786.1		-1.9754	38.1331	0.143936	0.297696
South_Africa_MGR_Mkuzi_1979	AY261362	QGM12788.1		-1.7324	11.4086	0.121522	0.233752
South_Africa_KNP_Pretorisuskop_1996	AY261363	CAN10098.1		-1.54666	14.1037	0.136496	0.242809
South_Africa_KNP_Pretorisuskop_1996	AY261363	CAN10110.1	MGF 360-6L	-1.95063	216.078	0.0757985	0.166711
South_Africa_KNP_Pretorisuskop_1996	AY261363	CBW46645.1		-1.70922	13.6684	0.0656003	0.124341
South_Africa_KNP_Pretorisuskop_1996	AY261363	CBW46671.1	ASFV_G_ACD_00290	-1.65699	2.80756	0.102892	0.174095
South_Africa_KNP_Pretorisuskop_1996	AY261363	AXZ95788.1		-1.80244	242.257	0.0728978	0.148141
South_Africa_KNP_Pretorisuskop_1996	AY261363	QGM12679.1		-1.95063	216.078	0.0757109	0.160466
Malawi_Tengani_1962	AY261364	CAN10098.1		-1.49559	12.2899	0.141798	0.237156
Malawi_Tengani_1962	AY261364	CAN10353.1		-1.57206	6.5451	0.0755667	0.135439
Malawi_Tengani_1962	AY261364	CBW46645.1		-1.55263	2.77404	0.0601693	0.124184
Malawi_Tengani_1962	AY261364	QGM12672.1		-1.37007	21.9456	0.107098	0.206533
Malawi_Tengani_1962	AY261364	QGM12790.1		-1.57206	6.5451	0.0755667	0.135439
Malawi_Tengani_1962	AY261364	QGM12791.1		-1.64724	38.3354	0.0798883	0.146294
South_Africa_Warmbaths_1987	AY261365	CAN10110.1	MGF 360-6L	-2.02976	13.1013	0.0916151	0.215945
South_Africa_Warmbaths_1987	AY261365	CBW46669.1	ASFV_G_ACD_00270	-1.93988	446.754	0.0806708	0.167156
South_Africa_Warmbaths_1987	AY261365	AJZ77135.1		-2.16969	287.923	0.088425	0.225307
South_Africa_Warmbaths_1987	AY261365	AXZ95786.1		-1.81879	74.0941	0.0804171	0.150304
South_Africa_Warmbaths_1987	AY261365	QEY87781.1		-2.01666	11.489	0.155011	0.331327
South_Africa_Warmbaths_1987	AY261365	QGM12679.1		-2.04532	131.383	0.0875469	0.215945
South_Africa_Warmbaths_1987	AY261365	QGM12786.1		-2.01666	11.489	0.16001	0.332485
South_Africa_Warmbaths_1987	AY261365	QGM12801.1		-1.84895	191.778	0.0719967	0.147831
Namibia_Warthog_1980	AY261366	CAN10358.1		-1.53372	22.4869	0.124962	0.206335
Namibia_Warthog_1980	AY261366	CBW46645.1		-1.73047	13.4181	0.0647129	0.124232
Namibia_Warthog_1980	AY261366	CBW46649.1	ASFV_G_ACD_00070, partial	-2.20356	19.1465	0.0399191	0.0891207
Namibia_Warthog_1980	AY261366	CBW46669.1	ASFV_G_ACD_00270	-2.18769	278.899	0.0717688	0.178898
Namibia_Warthog_1980	AY261366	AJZ77135.1		-2.16564	33.8598	0.0950873	0.232989
Namibia_Warthog_1980	AY261366	AXZ95786.1		-1.54792	5.5809	0.1022	0.197054
Namibia_Warthog_1980	AY261366	AXZ95788.1		-1.5336	27.2977	0.103014	0.167359
Namibia_Warthog_1980	AY261366	QGM12799.1		-1.52695	12.3941	0.174795	0.294305
Spain_E75_1975	FN557520	CBH29109.1	MGF 110-14L	-2.25124	213.09	0.0727357	0.189017
Spain_E75_1975	FN557520	CBH29110.1	MGF 360-4L	-1.8845	285.593	0.0750813	0.162909
Spain_E75_1975	FN557520	CBH29111.1	MGF 360-6L	-2.11435	218.037	0.0840461	0.211744
Spain_E75_1975	FN557520	CBH29113.1	MGF 300-1L	-1.90878	23.0778	0.0657339	0.142268
Spain_E75_1975	FN557520	CBW46669.1	ASFV_G_ACD_00270	-2.02358	424.316	0.0713718	0.151635
Spain_E75_1975	FN557520	AIY22367.1		-1.98824	17.8898	0.106416	0.229435
Spain_E75_1975	FN557520	QGM12679.1		-2.11435	218.037	0.0840026	0.211744
Russia_Georgia_2007	FR682468	CBW46650.1	MGF_110-1L	-1.76353	25.2258	0.104371	0.20618
Russia_Georgia_2007	FR682468	CBW46666.1	ASFV_G_ACD_00240	-2.24466	138.565	0.0857606	0.201494
Russia_Georgia_2007	FR682468	CBW46667.1	MGF_110-12L	-1.85926	20.4692	0.123644	0.228707
Russia_Georgia_2007	FR682468	CBW46668.1	MGF_110-13L	-2.20218	228.126	0.084798	0.212897
Russia_Georgia_2007	FR682468	CBW46669.1	ASFV_G_ACD_00270	-2.15594	332.827	0.0649971	0.148432
Russia_Georgia_2007	FR682468	CBW46670.1	MGF_360-4L	-1.83603	206.886	0.0772162	0.161494
Russia_Georgia_2007	FR682468	CBW46673.1	MGF_360-6L	-2.02565	19.9544	0.092402	0.211269
Russia_Georgia_2007	FR682468	AJZ77135.1		-2.15451	228.126	0.0998902	0.230103
Russia_Georgia_2007	FR682468	QGM12792.1		-1.76353	25.2258	0.104371	0.20618
Russia_Kashino_2013	KJ747406	CBW46658.1	ASFV_G_ACD_00160, partial	-2.17905	5.48066	0.102044	0.255515
Russia_Kashino_2013	KJ747406	CBW46669.1	ASFV_G_ACD_00270	-2.15821	283.293	0.0845057	0.160984
Russia_Kashino_2013	KJ747406	CBW46826.1	ASFV_G_ACD_01960	-1.85257	6.89396	0.0897444	0.163516
Russia_Kashino_2013	KJ747406	AJZ77135.1		-2.16969	32.2012	0.101977	0.230192
Russia_Kashino_2013	KJ747406	AJL34188.1		-2.07043	166.686	0.103021	0.225307
Russia_Kashino_2013	KJ747406	AIY22367.1		-2.2158	257.449	0.0827383	0.218935
Russia_Kashino_2013	KJ747406	AXZ95786.1		-1.97681	12.1445	0.0774137	0.156803
Russia_Kashino_2013	KJ747406	QED21537.1		-2.23326	13.9702	0.106013	0.191205
Russia_Kashino_2013	KJ747406	QGM12792.1		-1.7825	10.3551	0.104029	0.197212
Italy_26544_OG10_2010	KM102979	AJZ77142.1	KP177R	-1.66633	10.8422	0.0621952	0.122697
Italy_26544_OG10_2010	KM102979	AJZ77135.1	MGF 110-13L	-2.14032	46.3978	0.100715	0.230808
Italy_26544_OG10_2010	KM102979	AJZ77154.1	MGF 110-14	-2.23938	39.0108	0.0821945	0.206006
Italy_26544_OG10_2010	KM102979	AJZ77077.1	MGF 360-4L	-1.8845	231.768	0.0750813	0.162909
Italy_26544_OG10_2010	KM102979	AJZ77080.1	MGF 360-6L	-2.10522	269.991	0.0884802	0.212504
Italy_26544_OG10_2010	KM102979	AJZ77111.1	MGF 300-1L	-1.93665	24.8042	0.0657616	0.146817
Italy_26544_OG10_2010	KM102979	CAN10353.1		-1.63428	22.4199	0.0742947	0.133543
Italy_26544_OG10_2010	KM102979	CBW46669.1	ASFV_G_ACD_00270	-2.02358	336.275	0.0713718	0.151635
Italy_26544_OG10_2010	KM102979	AXZ95786.1		-1.69774	24.3365	0.0715714	0.125813
Italy_26544_OG10_2010	KM102979	QGM12679.1		-2.10522	297.68	0.0874012	0.212504
Italy_26544_OG10_2010	KM102979	QGM12790.1		-1.63428	22.4199	0.0742947	0.133543
Italy_26544_OG10_2010	KM102979	QGM12801.1		-1.88743	300.393	0.0750813	0.157076
Kenya_Tk1_2005	KM111294	AJL34008.1	BA71V-KP177R	-1.69215	24.8027	0.0625869	0.125372
Kenya_Tk1_2005	KM111294	AJL34009.1	BA71V-L83L	-1.53426	4.0265	0.0721903	0.13501
Kenya_Tk1_2005	KM111294	AJL34011.1	MGF 360-3L	-1.59149	2.47305	0.0771745	0.138128
Kenya_Tk1_2005	KM111294	AJL34025.1	MGF 110-12L	-1.9238	36.4054	0.144148	0.295767
Kenya_Tk1_2005	KM111294	AJL34027.1	MGF 360-4L	-1.64561	184.101	0.0745981	0.148201
Kenya_Tk1_2005	KM111294	AJL34028.1	MGF 360-6L	-1.95384	2.86289	0.0854725	0.199063
Kenya_Tk1_2005	KM111294	AJL34166.1	L11L	-2.10507	96.5985	0.0722304	0.148114
Kenya_Bus_2006	KM111295	AJL34173.1	BA71V-KP177R	-1.74498	18.2165	0.0635007	0.125061
Kenya_Bus_2006	KM111295	AJL34176.1	MGF 360-3L	-1.67145	239.849	0.0765535	0.144496
Kenya_Bus_2006	KM111295	AJL34187.1	MGF 110-11L(FRAG-2)	-1.90849	136.978	0.121979	0.251204
Kenya_Bus_2006	KM111295	AJL34189.1	MGF 110-13L	-2.05439	239.965	0.100724	0.225587
Kenya_Bus_2006	KM111295	AJL34190.1	MGF 110-14L	-2.12497	234.555	0.0581264	0.168714
Kenya_Bus_2006	KM111295	AJL34191.1	MGF 360-4L	-1.87723	28.3091	0.0737898	0.157166
Kenya_Bus_2006	KM111295	AJL34192.1	MGF 360-7L	-1.988	13.3034	0.0879168	0.192709
Kenya_Bus_2006	KM111295	AJL34329.1	L11L	-1.71634	57.3235	0.132312	0.242034
Portugal_L60_1960	KM262844	AIY22190.1	pMGF 360-2L	-1.67172	14.5235	0.11932	0.210623
Portugal_L60_1960	KM262844	AIY22191.1	structural Protein P22	-1.70496	17.2926	0.0624415	0.122878
Portugal_L60_1960	KM262844	AIY22200.1	pMGF 110-14L	-2.25124	268.036	0.0727357	0.189017
Portugal_L60_1960	KM262844	AIY22201.1	pMGF 360-4L	-1.89513	194.004	0.0734412	0.16177
Portugal_L60_1960	KM262844	AIY22202.1	pMGF 360-6L	-2.11274	254.045	0.0836941	0.214016
Portugal_L60_1960	KM262844	AIY22204.1	pMGF 300-1L	-1.93635	28.032	0.0649529	0.144544
Portugal_L60_1960	KM262844	CBW46669.1	ASFV_G_ACD_00270	-1.95583	108.842	0.0734269	0.151174
Portugal_L60_1960	KM262844	AIY22367.1		-1.97634	16.197	0.112896	0.228123
Portugal_L60_1960	KM262844	QGM12679.1		-2.11274	254.045	0.0835869	0.214016
Portugal_L60_1960	KM262844	QGM12801.1		-1.89513	194.004	0.0734412	0.15821
Portugal_NHV_1968	KM262845	AIY22353.1	pMGF 360-2L	-1.69496	12.3712	0.121927	0.218615
Portugal_NHV_1968	KM262845	AIY22368.1	pMGF 360-4L	-1.54713	19.2843	0.0990607	0.167606
Portugal_NHV_1968	KM262845	AIY22377.1	pMGF 505-4R	-1.48739	11.0729	0.0782386	0.133118
Portugal_NHV_1968	KM262845	CBW46669.1	ASFV_G_ACD_00270	-1.76332	257.911	0.100762	0.204135
Portugal_NHV_1968	KM262845	QGM12801.1		-1.60978	19.2843	0.0879706	0.16047
Spain_BA71_1971	KP055815	AKO62686.1	pKP177R	-1.68853	24.0539	0.0663582	0.121905
Spain_BA71_1971	KP055815	AKO62687.1	pL83L	-1.61643	5.80515	0.0769181	0.134414
Spain_BA71_1971	KP055815	AKO62709.1	pA505R	-1.50618	11.1778	0.0787684	0.134527
Spain_BA71_1971	KP055815	AKO62842.1	pBA71-DP86L	-1.41818	12.5777	0.210349	0.298488
Spain_BA71_1971	KP055815	CBW46826.1	ASFV_G_ACD_01960	-1.87182	60.2231	0.100237	0.190809
Spain_BA71_1971	KP055815	AOO54307.1	pKP93L	-1.49513	4.00126	0.122602	0.202903
Spain_BA71_1971	KP055815	QGM12790.1		-1.61643	5.80515	0.0769181	0.134301
Russia_Odintsovo_2014	KP843857	CAN10353.1		-1.61624	16.1489	0.0731682	0.133524
Russia_Odintsovo_2014	KP843857	CBW46651.1	ASFV_G_ACD_00090	-1.8271	17.5151	0.10962	0.219998
Russia_Odintsovo_2014	KP843857	CBW46669.1	ASFV_G_ACD_00270	-1.78458	299.255	0.0548323	0.103023
Russia_Odintsovo_2014	KP843857	AJZ77135.1		-2.13652	193.884	0.0916235	0.244481
Russia_Odintsovo_2014	KP843857	AJL34012.1		-1.76353	26.3014	0.104371	0.20618
Russia_Odintsovo_2014	KP843857	AXZ95786.1		-1.77708	142.055	0.0784772	0.144611
Russia_Odintsovo_2014	KP843857	AXZ95788.1		-1.75687	188.655	0.0752545	0.153697
Russia_Odintsovo_2014	KP843857	QGM12790.1		-1.61624	40.0255	0.0731682	0.133524
Italy_47_Ss_2008_2008	KX354450	AOO54320.1	pMGF 110-12L	-1.92722	20.0408	0.123007	0.235987
Italy_47_Ss_2008_2008	KX354450	AOO54321.1	pMGF 110-13L	-2.17925	47.9352	0.0931496	0.225283
Italy_47_Ss_2008_2008	KX354450	AOO54322.1	pLIS117	-2.29929	47.9352	0.0899135	0.242345
Italy_47_Ss_2008_2008	KX354450	AOO54323.1	pMGF 110-14L	-2.19708	328.65	0.076124	0.188858
Italy_47_Ss_2008_2008	KX354450	AOO54324.1	pMGF 360-4L	-1.87308	192.372	0.077431	0.161562
Italy_47_Ss_2008_2008	KX354450	AOO54325.1	pMGF 360-6L	-2.09541	227.822	0.0870071	0.20955
Italy_47_Ss_2008_2008	KX354450	CBW46669.1	ASFV_G_ACD_00270	-2.13548	215.897	0.0691405	0.173438
Italy_47_Ss_2008_2008	KX354450	CBW46826.1	ASFV_G_ACD_01960	-1.89049	26.9168	0.0802644	0.169694
Italy_47_Ss_2008_2008	KX354450	AIY22367.1		-1.99659	221.554	0.107126	0.223667
Italy_47_Ss_2008_2008	KX354450	QGM12679.1		-2.09541	227.822	0.0870071	0.20955
Italy_47_Ss_2008_2008	KX354450	QGM12801.1		-1.88285	157.413	0.0740049	0.157233
Estonia_2014	LS478113	SPS73415.1	DP60R EST-A CDS	-1.62408	14.4754	0.078477	0.128922
Estonia_2014	LS478113	SPS73416.1	ASFV G ACD 01990 EST-A CDS	-1.98056	10.1869	0.100984	0.182244
Estonia_2014	LS478113	SPS73419.1	ASFV G ACD 01960 EST-A CDS	-1.70094	3.60721	0.084137	0.161918
Estonia_2014	LS478113	SPS73426.1	MGF 110-14L CDS	-2.1992	17.5525	0.0803939	0.190966
Estonia_2014	LS478113	SPS73427.1	ASFV G ACD 00270 CDS	-2.15443	157.177	0.0769758	0.156622
Estonia_2014	LS478113	SPS73430.1	MGF 360-6L CDS	-2.03196	2.74538	0.0954388	0.211197
Estonia_2014	LS478113	SPS73449.1	MGF 505-4R CDS	-1.4628	13.7175	0.0779371	0.130856
Estonia_2014	LS478113	SPS73583.1	ASFV G ACD 01960 EST-B CDS	-1.73067	3.19319	0.0939342	0.17234
Estonia_2014	LS478113	QGM12679.1		-2.03196	28.9471	0.0886632	0.211197
Poland_Pol16_20186_o7_2016-2017	MG939583	AXZ95774.1	MGF_110-1L	-1.7753	10.1472	0.105317	0.199456
Poland_Pol16_20186_o7_2016-2017	MG939583	AXZ95786.1	ACD_00240	-1.86328	12.1352	0.0841279	0.160628
Poland_Pol16_20186_o7_2016-2017	MG939583	AXZ95788.1	MGF_360-4L	-1.82182	194.124	0.0766333	0.159164
Poland_Pol16_20186_o7_2016-2017	MG939583	AXZ95929.1	ACD_01960	-1.67164	10.7895	0.0968945	0.172187
Poland_Pol16_20186_o7_2016-2017	MG939583	CAN10360.1	p285L	-2.14298	31.1492	0.104455	0.2539
Poland_Pol16_20186_o7_2016-2017	MG939583	CBW46658.1	ASFV_G_ACD_00160, partial	-2.17985	44.3852	0.103031	0.258028
Poland_Pol16_20186_o7_2016-2017	MG939583	CBW46669.1	ASFV_G_ACD_00270	-2.13926	239.185	0.0862116	0.166523
Poland_Pol16_20186_o7_2016-2017	MG939583	QGM12792.1		-1.77421	10.1472	0.105317	0.199456
Poland_Pol16_20538_o9_2016-2017	MG939584	AXZ95941.1	MGF_360-4L	-1.82182	182.516	0.0766333	0.159164
Poland_Pol16_20538_o9_2016-2017	MG939584	AXZ95943.1	MGF_360-6L	-2.01013	26.3367	0.0948499	0.212068
Poland_Pol16_20538_o9_2016-2017	MG939584	CAN10360.1	p285L	-2.16946	27.3572	0.102002	0.246864
Poland_Pol16_20538_o9_2016-2017	MG939584	CBW46658.1	ASFV_G_ACD_00160, partial	-2.13378	27.3572	0.102002	0.237959
Poland_Pol16_20538_o9_2016-2017	MG939584	CBW46669.1	ASFV_G_ACD_00270	-2.13926	240.009	0.0862116	0.166523
Poland_Pol16_20538_o9_2016-2017	MG939584	QGM12679.1		-2.01013	26.3367	0.0869356	0.212068
Poland_Pol16_20540_o10_2016-2017	MG939585	CAN10110.1	MGF 360-6L	-2.0072	23.3366	0.0945594	0.213419
Poland_Pol16_20540_o10_2016-2017	MG939585	CAN10360.1	p285L	-2.0659	22.3446	0.103936	0.257476
Poland_Pol16_20540_o10_2016-2017	MG939585	CBW46658.1	ASFV_G_ACD_00160, partial	-2.1344	22.3446	0.103152	0.240297
Poland_Pol16_20540_o10_2016-2017	MG939585	CBW46669.1	ASFV_G_ACD_00270	-2.14428	316.242	0.0830547	0.160003
Poland_Pol16_20540_o10_2016-2017	MG939585	AJL34012.1		-1.77105	17.0866	0.104194	0.200577
Poland_Pol16_20540_o10_2016-2017	MG939585	AXZ95788.1		-1.87969	191.183	0.0766333	0.160305
Poland_Pol16_20540_o10_2016-2017	MG939585	QGM12679.1		-2.0072	23.3366	0.0866438	0.213419
Poland_Pol16_29413_o23_2016-2017	MG939586	CAN10110.1	MGF 360-6L	-2.0072	27.4481	0.0945594	0.213419
Poland_Pol16_29413_o23_2016-2017	MG939586	CAN10360.1	p285L	-2.14298	27.3135	0.104455	0.2539
Poland_Pol16_29413_o23_2016-2017	MG939586	CBW46658.1	ASFV_G_ACD_00160, partial	-2.17985	46.2495	0.103031	0.258028
Poland_Pol16_29413_o23_2016-2017	MG939586	CBW46669.1	ASFV_G_ACD_00270	-2.16058	316.212	0.0833547	0.158865
Poland_Pol16_29413_o23_2016-2017	MG939586	CBW46826.1	ASFV_G_ACD_01960	-1.65636	12.3306	0.0982439	0.174033
Poland_Pol16_29413_o23_2016-2017	MG939586	AJZ77135.1		-2.19601	183.054	0.10367	0.238
Poland_Pol16_29413_o23_2016-2017	MG939586	AXZ95786.1		-1.96302	38.5713	0.0774817	0.155825
Poland_Pol16_29413_o23_2016-2017	MG939586	AXZ95788.1		-1.83255	18.6203	0.0754904	0.157986
Poland_Pol16_29413_o23_2016-2017	MG939586	QGM12679.1		-2.0072	27.4481	0.0866438	0.213419
Poland_Pol17_03029_C201_2016-2017	MG939587	AXZ95981.1	MGF_110-11L	-1.57578	21.5676	0.126853	0.234103
Poland_Pol17_03029_C201_2016-2017	MG939587	CAN10110.1	MGF 360-6L	-2.03588	168.776	0.0949815	0.21194
Poland_Pol17_03029_C201_2016-2017	MG939587	CAN10360.1	p285L	-2.14298	30.4636	0.104455	0.2539
Poland_Pol17_03029_C201_2016-2017	MG939587	CBW46658.1	ASFV_G_ACD_00160, partial	-2.17985	41.2704	0.103031	0.258028
Poland_Pol17_03029_C201_2016-2017	MG939587	CBW46669.1	ASFV_G_ACD_00270	-2.16058	323.841	0.0833547	0.158865
Poland_Pol17_03029_C201_2016-2017	MG939587	AJZ77135.1		-2.19601	180.478	0.10367	0.238
Poland_Pol17_03029_C201_2016-2017	MG939587	AXZ95786.1		-1.96302	43.7978	0.0774817	0.155825
Poland_Pol17_03029_C201_2016-2017	MG939587	AXZ95788.1		-1.83255	159.982	0.0754904	0.157986
Poland_Pol17_03029_C201_2016-2017	MG939587	QGM12679.1		-2.03588	168.776	0.088726	0.21194
Poland_Pol17_04461_C210_2016-2017	MG939588	AXZ96066.1	MGF_110-1L	-1.7753	11.7844	0.105317	0.199456
Poland_Pol17_04461_C210_2016-2017	MG939588	AXZ96212.1	ACD_01960	-1.67164	10.4975	0.0968945	0.172187
Poland_Pol17_04461_C210_2016-2017	MG939588	CAN10110.1	MGF 360-6L	-2.03588	163.966	0.0949815	0.21194
Poland_Pol17_04461_C210_2016-2017	MG939588	CAN10360.1	p285L	-2.14298	29.4613	0.104455	0.2539
Poland_Pol17_04461_C210_2016-2017	MG939588	CBW46658.1	ASFV_G_ACD_00160, partial	-2.17985	43.5449	0.103031	0.258028
Poland_Pol17_04461_C210_2016-2017	MG939588	CBW46669.1	ASFV_G_ACD_00270	-2.09839	293.829	0.084841	0.163296
Poland_Pol17_04461_C210_2016-2017	MG939588	AJZ77135.1		-2.17196	173.791	0.100242	0.235712
Poland_Pol17_04461_C210_2016-2017	MG939588	AIY22367.1		-2.17275	173.791	0.0903276	0.222921
Poland_Pol17_04461_C210_2016-2017	MG939588	AXZ95786.1		-1.87581	44.5967	0.0810864	0.155956
Poland_Pol17_04461_C210_2016-2017	MG939588	QGM12679.1		-2.03588	163.966	0.088726	0.21194
Poland_Pol17_05838_C220_2016-2017	MG939589	CAN10110.1	MGF 360-6L	-2.01821	183.938	0.0947604	0.213452
Poland_Pol17_05838_C220_2016-2017	MG939589	CBW46658.1	ASFV_G_ACD_00160, partial	-2.1344	19.9754	0.103152	0.240297
Poland_Pol17_05838_C220_2016-2017	MG939589	CBW46669.1	ASFV_G_ACD_00270	-2.16058	340.649	0.0833547	0.158865
Poland_Pol17_05838_C220_2016-2017	MG939589	AJZ77135.1		-2.19601	27.6404	0.10367	0.238
Poland_Pol17_05838_C220_2016-2017	MG939589	AIY22367.1		-2.24005	211.145	0.0903276	0.224734
Poland_Pol17_05838_C220_2016-2017	MG939589	AXZ95786.1		-1.96302	64.5245	0.0774817	0.155825
Poland_Pol17_05838_C220_2016-2017	MG939589	AXZ95788.1		-1.83255	174.242	0.0754904	0.157986
Poland_Pol17_05838_C220_2016-2017	MG939589	QGM12790.1		-1.58986	39.6548	0.0743622	0.131093
Uganda_R8_2015	MH025916	AXB49222.1	p22-1R	-1.7212	35.2283	0.0618801	0.118346
Uganda_R8_2015	MH025916	AXB49225.1	p360-3L	-1.65174	177.172	0.079189	0.142918
Uganda_R8_2015	MH025916	AXB49237.1	p110-11L	-1.81131	120.198	0.129354	0.253879
Uganda_R8_2015	MH025916	AXB49239.1	p110-13L	-2.2036	174.951	0.0829484	0.221199
Uganda_R8_2015	MH025916	AXB49240.1	p110-14L	-2.24779	303.816	0.0770274	0.199358
Uganda_R8_2015	MH025916	AXB49241.1	p360-4L	-1.83531	38.8499	0.0755674	0.154918
Uganda_R8_2015	MH025916	AXB49242.1	p360-5L	-2.0154	27.8206	0.0902464	0.201924
Uganda_R8_2015	MH025916	AXB49285.1	pEP152R	-1.63172	13.0502	0.0505533	0.0972642
Uganda_R7_2015	MH025917	AXB49398.1	p360-3L	-1.65174	178.23	0.079189	0.142918
Uganda_R7_2015	MH025917	AXB49411.1	p110-11L	-1.96297	177.193	0.129479	0.261294
Uganda_R7_2015	MH025917	AXB49413.1	p110-13L	-2.16959	162.743	0.0868256	0.221187
Uganda_R7_2015	MH025917	AXB49414.1	p110-14L	-2.27078	310.507	0.0748744	0.197057
Uganda_R7_2015	MH025917	AXB49415.1	p360-4L	-1.85202	35.5834	0.0755674	0.154918
Uganda_R7_2015	MH025917	AXB49459.1	pEP152R	-1.66382	3.47882	0.0505533	0.0972642
Uganda_R7_2015	MH025917	AXB49555.1	pL11L	-1.63235	139.395	0.135547	0.23831
Uganda_R7_2015	MH025917	CAN10156.1		-1.66685	3.47882	0.0487385	0.0912144
Uganda_R25_2015	MH025918	AXB49569.1	p22-1R	-1.7212	37.9871	0.0618801	0.118346
Uganda_R25_2015	MH025918	AXB49570.1	pL83L	-1.57993	29.8509	0.0732205	0.132281
Uganda_R25_2015	MH025918	AXB49572.1	p360-3L	-1.65174	196.095	0.079189	0.142918
Uganda_R25_2015	MH025918	AXB49583.1	p110-11_10L	-1.96297	192.069	0.112223	0.248402
Uganda_R25_2015	MH025918	AXB49585.1	p110-13L	-2.16959	176.728	0.0868256	0.221187
Uganda_R25_2015	MH025918	AXB49586.1	p110-14L	-2.27078	296.149	0.0748744	0.197057
Uganda_R25_2015	MH025918	AXB49587.1	p360-4L	-1.85202	31.1577	0.0755674	0.154918
Uganda_R25_2015	MH025918	AXB49588.1	p360-5L	-2.03213	22.9147	0.0910128	0.205162
Uganda_N10_2015	MH025919	AXB49741.1	p22-1R	-1.7212	35.15	0.0618801	0.118346
Uganda_N10_2015	MH025919	AXB49744.1	p360-3L	-1.65124	178.688	0.079189	0.142918
Uganda_N10_2015	MH025919	AXB49756.1	p110-11L	-1.94205	124.723	0.124029	0.262632
Uganda_N10_2015	MH025919	AXB49758.1	p110-13L	-2.19247	147.258	0.0826745	0.220168
Uganda_N10_2015	MH025919	AXB49759.1	p110-14L	-2.24919	189.678	0.0697251	0.193706
Uganda_N10_2015	MH025919	AXB49760.1	p360-4L	-1.86473	29.4235	0.073161	0.158165
Uganda_N10_2015	MH025919	AXB49761.1	p360-5L	-1.99368	17.5331	0.0924464	0.203224
Uganda_N10_2015	MH025919	AXB49898.1	pL11L	-1.67885	36.5442	0.134188	0.237708
Uganda_N10_2015	MH025919	AIY22367.1		-1.96071	116.528	0.116815	0.238669
Uganda_R35_2015	MH025920	AXB49915.1	p360-3L	-1.65174	174.952	0.079189	0.142918
Uganda_R35_2015	MH025920	AXB49927.1	p110-11L	-1.9095	154.172	0.125583	0.257215
Uganda_R35_2015	MH025920	AXB49929.1	p110-13L	-2.15317	185.337	0.0853819	0.221181
Uganda_R35_2015	MH025920	AXB49930.1	p110-14L	-2.27072	293.751	0.0744226	0.195901
Uganda_R35_2015	MH025920	AXB49931.1	p360-4L	-1.85623	30.3157	0.0751416	0.154918
Uganda_R35_2015	MH025920	AXB49932.1	p360-5L	-2.03213	19.1409	0.0910128	0.205162
Uganda_R35_2015	MH025920	AIY22367.1		-2.11896	156.166	0.113826	0.256987
Poland_ASFV_POL_Podlaskie_2015	MH681419	CAN10353.1		-1.58986	4.86059	0.0743622	0.131733
Poland_ASFV_POL_Podlaskie_2015	MH681419	CAN10360.1	p285L	-2.18148	3.76679	0.102044	0.250441
Poland_ASFV_POL_Podlaskie_2015	MH681419	CBW46658.1	ASFV_G_ACD_00160, partial	-2.17905	3.76679	0.102044	0.255515
Poland_ASFV_POL_Podlaskie_2015	MH681419	CBW46669.1	ASFV_G_ACD_00270	-2.15615	347.82	0.0769942	0.156633
Poland_ASFV_POL_Podlaskie_2015	MH681419	AJZ77135.1		-2.16029	33.9045	0.10409	0.236317
Poland_ASFV_POL_Podlaskie_2015	MH681419	AIY22367.1		-2.19076	259.42	0.0894912	0.222906
Poland_ASFV_POL_Podlaskie_2015	MH681419	AXZ95786.1		-1.95637	36.3184	0.0751838	0.150719
Poland_ASFV_POL_Podlaskie_2015	MH681419	QGM12790.1		-1.58986	4.86059	0.0743622	0.131733
China_ASFV-SY18_2018	MH766894	AJL34191.1	MGF 360-4L	-1.85358	189.29	0.101875	0.205332
China_ASFV-SY18_2018	MH766894	CBW46658.1	ASFV_G_ACD_00160	-2.24917	51.2293	0.110465	0.265887
China_ASFV-SY18_2018	MH766894	CBW46666.1	ASFV_G_ACD_00240	-2.20329	299.722	0.097017	0.215809
China_ASFV-SY18_2018	MH766894	CBW46669.1	ASFV_G_ACD_00270	-1.88369	207.368	0.0775995	0.166279
China_ASFV-SY18_2018	MH766894	CAN10106.1	MGF_110-12L	-1.8335	211.366	0.126981	0.226373
China_ASFV-SY18_2018	MH766894	CAN10107.1	MGF 110-13L	-2.1736	179.812	0.0978135	0.230389
China_ASFV-SY18_2018	MH766894	CAN10108.1	MGF 110-14	-2.14579	368.906	0.0723355	0.168864
China_ASFV-SY18_2018	MH766894	CAN10109.1	MGF_360-4L	-1.74091	18.4929	0.0799555	0.148167
China_ASFV-SY18_2018	MH766894	CAN10110.1	MGF_360-6L	-1.88252	29.7676	0.0927458	0.197321
China_ASFV-SY18_2018	MH766894	CBW46668.1	MGF_110-13L	-2.14579	311.817	0.0915391	0.215924
China_AnhuiXCGQ_2018	MK128995	AYW33973.1	L83L	-1.58938	10.8606	0.0756225	0.132872
China_AnhuiXCGQ_2018	MK128995	AYW33957.1	MGF_110-1L	-1.74894	21.052	0.104581	0.20619
China_AnhuiXCGQ_2018	MK128995	AYW33977.1	ASFV_G_ACD_00160	-2.21058	41.9033	0.10281	0.251622
China_AnhuiXCGQ_2018	MK128995	AYW33980.1	ASFV_G_ACD_00240	-2.15796	39.751	0.0876142	0.195732
China_AnhuiXCGQ_2018	MK128995	AYW33981.1	MGF_110-12L	-1.81225	39.4949	0.12117	0.225776
China_AnhuiXCGQ_2018	MK128995	AYW33982.1	ASFV_G_ACD_00270	-2.12912	163.432	0.0863649	0.164405
China_AnhuiXCGQ_2018	MK128995	AYW33968.1	MGF_360-4L	-1.82174	176.658	0.0736264	0.155635
China_AnhuiXCGQ_2018	MK128995	CAN10360.1	p285L	-2.12781	41.9033	0.103266	0.251622
China_AnhuiXCGQ_2018	MK128995	QGM12792.1		-1.74605	21.052	0.104581	0.20619
China_HLJ_2018	MK333180	QBH90481.1	NA	-2.1344	29.7429	0.103152	0.240297
China_HLJ_2018	MK333180	QBH90489.1	NA	-1.95637	103.714	0.0751838	0.150719
China_HLJ_2018	MK333180	QBH90490.1	NA	-1.86315	25.2179	0.127032	0.232938
China_HLJ_2018	MK333180	QBH90491.1	NA	-2.19076	305.657	0.0894912	0.222906
China_HLJ_2018	MK333180	QBH90492.1	NA	-2.15615	370.243	0.0769942	0.156633
China_HLJ_2018	MK333180	QBH90493.1	NA	-1.842	182.185	0.0766333	0.16031
China_HLJ_2018	MK333180	QBH90495.1	NA	-2.00793	15.2129	0.0945594	0.213192
China_HLJ_2018	MK333180	CAN10360.1	CAN10360.1	-2.1344	29.7429	0.103936	0.24925
China_HLJ_2018	MK333180	AJZ77135.1		-2.16029	40.4774	0.10409	0.236317
China_HLJ_2018	MK333180	QGM12679.1		-2.00793	15.2129	0.0876015	0.213192
China_LN_2018	MK333181	QBH90666.1	NA	-2.1344	29.7429	0.103152	0.240297
China_LN_2018	MK333181	QBH90674.1	NA	-1.95637	103.714	0.0751838	0.150719
China_LN_2018	MK333181	QBH90675.1	NA	-1.86315	25.2179	0.127032	0.232938
China_LN_2018	MK333181	QBH90676.1	NA	-2.19076	305.657	0.0894912	0.222906
China_LN_2018	MK333181	QBH90677.1	NA	-2.15615	370.243	0.0769942	0.156633
China_LN_2018	MK333181	QBH90678.1	NA	-1.842	182.185	0.0766333	0.16031
China_LN_2018	MK333181	QBH90680.1	NA	-2.00793	15.2129	0.0945594	0.213192
China_LN_2018	MK333181	CAN10360.1	CAN10360.1	-2.1344	29.7429	0.103936	0.24925
China_LN_2018	MK333181	AJZ77135.1		-2.16029	40.4774	0.10409	0.236317
China_LN_2018	MK333181	QGM12679.1		-2.00793	15.2129	0.0876015	0.213192
Belgium_Etalle_wb_2018	MK543947	QED90430.1		-1.76102	12.8971	0.10329	0.206164
Belgium_Etalle_wb_2018	MK543947	QED90431.1		-1.75947	16.2136	0.109596	0.222661
Belgium_Etalle_wb_2018	MK543947	QED90438.1		-2.22214	39.4639	0.10595	0.258151
Belgium_Etalle_wb_2018	MK543947	QED90445.1		-2.16366	181.925	0.087005	0.193709
Belgium_Etalle_wb_2018	MK543947	QED90447.1		-2.22618	290.633	0.0856936	0.162161
Belgium_Etalle_wb_2018	MK543947	QED90448.1		-1.80505	22.3042	0.0757115	0.160331
Belgium_Etalle_wb_2018	MK543947	QED90450.1		-2.01821	124.552	0.0947604	0.213452
Belgium_Etalle_wb_2018	MK543947	CAN10360.1		-2.09953	18.7027	0.10595	0.258151
Belgium_Etalle_wb_2018	MK543947	AJZ77135.1		-2.18705	204.187	0.0899089	0.23601
Belgium_Etalle_wb_2018	MK543947	QGM12679.1		-2.01821	152.093	0.0883039	0.213452
Belgium_Etalle_wb_2018	MK543947	QGM12792.1		-1.75947	12.8971	0.0997262	0.186105
Lithuania_LT14_2014	MK628478	QEY87789.1		-1.77371	17.3552	0.105095	0.199461
Lithuania_LT14_2014	MK628478	QEY87797.1		-2.16946	35.9717	0.102002	0.246864
Lithuania_LT14_2014	MK628478	QEY87806.1		-1.93074	13.7169	0.127982	0.23238
Lithuania_LT14_2014	MK628478	QEY87807.1		-2.06406	26.119	0.0929392	0.225289
Lithuania_LT14_2014	MK628478	QEY87808.1		-2.17167	182.208	0.0788923	0.195706
Lithuania_LT14_2014	MK628478	QEY87809.1		-2.22618	262.947	0.0856936	0.162161
Lithuania_LT14_2014	MK628478	QEY87810.1		-1.80505	21.2383	0.0757115	0.160331
Lithuania_LT14_2014	MK628478	QEY87813.1		-2.0131	18.166	0.0945594	0.214421
Lithuania_LT14_2014	MK628478	CBW46658.1		-2.13378	35.9717	0.102002	0.237959
Lithuania_LT14_2014	MK628478	QGM12679.1		-2.0131	179.709	0.0876015	0.214421
Lithuania_LT14_2014	MK628478	QGM12792.1		-1.76632	17.3552	0.105095	0.199461
China_wbBS01_2018	MK645909	QDL88024.1		-2.17985	12.536	0.103031	0.258028
China_wbBS01_2018	MK645909	QDL88031.1		-1.8376	44.9238	0.0822475	0.155397
China_wbBS01_2018	MK645909	QDL88033.1		-2.20807	26.0917	0.0891579	0.217778
China_wbBS01_2018	MK645909	QDL88034.1		-2.13926	303.504	0.0862116	0.166523
China_wbBS01_2018	MK645909	QDL88035.1		-1.86741	17.0349	0.0766333	0.160805
China_wbBS01_2018	MK645909	CAN10360.1		-2.17985	17.8701	0.103031	0.2539
China_wbBS01_2018	MK645909	AJZ77135.1		-2.07071	26.8693	0.102572	0.231332
Ukraine_Kyiv_2014	MN194591	QED21541.1		-1.69219	10.1996	0.11586	0.214055
Ukraine_Kyiv_2014	MN194591	QED21556.1		-1.58867	45.9913	0.1235	0.23207
Ukraine_Kyiv_2014	MN194591	QED21558.1		-1.8412	7.4003	0.126695	0.233172
Ukraine_Kyiv_2014	MN194591	QED21559.1		-2.18458	180.868	0.0838429	0.208111
Ukraine_Kyiv_2014	MN194591	QED21560.1		-1.86044	19.0872	0.0756411	0.154963
Ukraine_Kyiv_2014	MN194591	CBW46669.1		-2.05054	148.831	0.0689595	0.160912
Ukraine_Kyiv_2014	MN194591	AJZ77135.1		-2.08987	187.631	0.0994357	0.229102
Ukraine_Kyiv_2014	MN194591	AXZ95786.1		-1.8436	41.1298	0.0795267	0.150984
Ukraine_Kyiv_2014	MN194591	QGM12792.1		-1.7744	17.5192	0.101969	0.192808
Zambia_LIV_1983	MN318203	QGM12665.1		-1.61911	10.2619	0.116815	0.215815
Zambia_LIV_1983	MN318203	QGM12666.1		-1.73302	19.531	0.0623259	0.120836
Zambia_LIV_1983	MN318203	QGM12667.1		-1.48967	31.5085	0.0798682	0.136831
Zambia_LIV_1983	MN318203	QGM12677.1		-1.6709	15.5388	0.103355	0.191597
Zambia_LIV_1983	MN318203	CBW46669.1		-1.72115	313.789	0.0631495	0.115084
Zambia_LIV_1983	MN318203	AJZ77135.1		-2.23295	67.1241	0.0906618	0.238531
Zambia_LIV_1983	MN318203	QGM12790.1		-1.48424	18.5307	0.0739748	0.135439
South_Africa_2_2008	MN336500	QGM12788.1		-1.59205	12.2291	0.118464	0.21174
South_Africa_2_2008	MN336500	QGM12791.1		-1.58739	138.301	0.077255	0.137669
South_Africa_2_2008	MN336500	QGM12801.1		-1.55654	34.4888	0.0709107	0.128717
South_Africa_2_2008	MN336500	QGM12802.1		-1.77641	34.0468	0.0703312	0.142368
South_Africa_2_2008	MN336500	CAN10110.1		-1.7478	34.0468	0.0703312	0.142368
South_Africa_2_2008	MN336500	CBW46645.1		-1.73839	21.1442	0.0621552	0.120766
South_Africa_2_2008	MN336500	CBW46671.1		-1.5225	24.0333	0.0954836	0.160207
South_Africa_2_2008	MN336500	AJZ77135.1		-2.01354	11.2789	0.0927814	0.212163
South_Africa_2_2008	MN336500	AXZ95788.1		-1.58203	37.4636	0.0709107	0.142301
South_Africa_1985	MN394630	CAN10110.1		-1.94391	28.792	0.0706731	0.15757
South_Africa_1985	MN394630	CBW46669.1		-2.17877	378.839	0.0634987	0.147177
South_Africa_1985	MN394630	AJZ77135.1		-2.2094	27.4406	0.091955	0.233378
South_Africa_1985	MN394630	AIY22367.1		-2.00874	24.5841	0.0991399	0.20608
South_Africa_1985	MN394630	AXZ95788.1		-1.83683	252.799	0.074621	0.150413
South_Africa_1985	MN394630	QGM12668.1		-1.56097	17.8783	0.0895418	0.160472
South_Africa_1985	MN394630	QGM12677.1		-1.74894	34.2025	0.0871028	0.169597
South_Africa_1985	MN394630	QGM12679.1		-1.94391	26.5743	0.0706731	0.15757
South_Africa_1985	MN394630	QGM12801.1		-1.79878	252.799	0.0759246	0.146817

## Sheet: Table S5
Table S5. Genes with evidence for balancing selection.
Strain Name	GenBank ID (Strain)	GenBank ID (Gene)	GeneName	Tajima's D	CLR	Pi	Theta
Benin_1997	AM712239	CAN10117.1	MGF 360-9L	0.489594	1.04349	0.0840013	0.0660519
Benin_1997	AM712239	CAN10127.1	MGF 505-5R	0.023758	0	0.117352	0.118523
Benin_1997	AM712239	CAN10128.1	MGF 505-6R	0.266466	0	0.146027	0.140336
Benin_1997	AM712239	CAN10144.1	Ribonucleotide reductase large subunit	0.0326255	0.061767	0.0529223	0.0523371
Benin_1997	AM712239	CAN10170.1	PC62L	-0.133083	0	0.0418715	0.0443727
Benin_1997	AM712239	CAN10254.1	pDP71L	0.173437	0	0.102061	0.088246
Benin_1997	AM712239	CAN10369.1		0.0039236	0	0.103922	0.123565
Benin_1997	AM712239	CBW46699.1	ASFV_G_ACD_00600	0.24333	0	0.0608423	0.0568896
Benin_1997	AM712239	AJL34224.1		0.16121	0.070794	0.0544198	0.0523371
Benin_1997	AM712239	AOO54368.1	hypothetical protein AFSV47Ss_0063	-0.150758	0	0.0632336	0.0650725
Benin_1997	AM712239	AOO54437.1	hypothetical protein AFSV47Ss_0132	0.164386	0.004637	0.026343	0.027307
Benin_1997	AM712239	AOO54474.1	hypothetical protein AFSV47Ss_0169	-0.113279	0	0.0367355	0.0398227
Benin_1997	AM712239	AOO54492.1	hypothetical protein AFSV47Ss_0187	-0.040982	0	0.0490376	0.0511993
Benin_1997	AM712239	AOO54531.1	hypothetical protein AFSV47Ss_0226	0.11662	0	0.100112	0.0946936
Benin_1997	AM712239	AOO54532.1	hypothetical protein AFSV47Ss_0227	0.11662	0	0.100112	0.0971823
Benin_1997	AM712239	QGM12778.1		-0.176786	1.21907	0.0616017	0.0659875
Portugal_OURT_88.3_1988	AM712240	CAN10359.1	MGF 110-5L	0.356551	0.536893	0.292025	0.265583
Portugal_OURT_88.3_1988	AM712240	CAN10360.1	p285L	0.793756	0.464579	0.285324	0.241204
Portugal_OURT_88.3_1988	AM712240	CAN10368.1	MGF 300-1L	1.1179	0.068521	0.178932	0.148778
Portugal_OURT_88.3_1988	AM712240	CAN10372.1	MGF 360-8L	0.751252	0	0.162415	0.134057
Portugal_OURT_88.3_1988	AM712240	CAN10373.1	MGF 360-9L	0.339056	0	0.168091	0.14779
Portugal_OURT_88.3_1988	AM712240	CAN10377.1	MGF 505-7R	0.314104	0	0.150578	0.138128
Portugal_OURT_88.3_1988	AM712240	CAN10505.1	pDP71L	0.122459	0	0.0938417	0.09048
Portugal_OURT_88.3_1988	AM712240	CBW46658.1	ASFV_G_ACD_00160, partial	0.793756	0.508502	0.32612	0.256126
Portugal_OURT_88.3_1988	AM712240	CBW46699.1	ASFV_G_ACD_00600	0.248013	0	0.051294	0.0478734
Portugal_OURT_88.3_1988	AM712240	AJL34224.1		0.178044	0.233411	0.0548017	0.0523371
Portugal_OURT_88.3_1988	AM712240	AOO54437.1	hypothetical protein AFSV47Ss_0132	0.179932	0	0.0302729	0.0284448
Portugal_OURT_88.3_1988	AM712240	AOO54531.1	hypothetical protein AFSV47Ss_0226	0.122459	0.178517	0.0938417	0.09048
Portugal_OURT_88.3_1988	AM712240	AOO54532.1	hypothetical protein AFSV47Ss_0227	0.122459	0.178517	0.0975997	0.0944216
Portugal_OURT_88.3_1988	AM712240	QGM12684.1		0.751252	0	0.162415	0.134057
Portugal_OURT_88.3_1988	AM712240	QGM12685.1		0.771858	0	0.173178	0.145678
Kenya_1950	AY261360	CBW46691.1	ASFV_G_ACD_00520	-0.324483	0.122514	0.106126	0.103205
Kenya_1950	AY261360	CBW46692.1		0.0651377	0	0.121427	0.118067
Kenya_1950	AY261360	AJL34029.1		0.0407599	0	0.126925	0.113604
Kenya_1950	AY261360	AJL34042.1		0.149513	0.072788	0.164161	0.150663
Kenya_1950	AY261360	AJL34062.1		-0.272972	0	0.0444779	0.0511993
Kenya_1950	AY261360	AJL34224.1		0.0362804	0.156433	0.0534147	0.0523371
Kenya_1950	AY261360	AOO54420.1	hypothetical protein AFSV47Ss_0115	-0.179321	10.569	0.125986	0.131827
Kenya_1950	AY261360	AOO54437.1	hypothetical protein AFSV47Ss_0132	0.179932	0	0.0309061	0.0273063
Kenya_1950	AY261360	AOO54474.1	hypothetical protein AFSV47Ss_0169	-0.140198	0	0.0360018	0.0375471
Kenya_1950	AY261360	AOO54492.1	hypothetical protein AFSV47Ss_0187	-0.0521327	0.378561	0.0523544	0.0534748
Kenya_1950	AY261360	AOO54502.1	hypothetical protein AFSV47Ss_0197	-0.266601	0	0.0481321	0.0520974
Malawi_Lil_1983	AY261361	CAN10358.1		0.343919	2.89408	0.197778	0.180039
Malawi_Lil_1983	AY261361	CAN10360.1	p285L	0.187313	0	0.145253	0.146627
Malawi_Lil_1983	AY261361	CBW46657.1	MGF_110-7L	0.19354	0.605327	0.204244	0.193324
Malawi_Lil_1983	AY261361	CBW46658.1	ASFV_G_ACD_00160, partial	0.324713	0.020807	0.137525	0.124441
Malawi_Lil_1983	AY261361	CBW46691.1	ASFV_G_ACD_00520	0.27016	0.847998	0.170161	0.159277
Malawi_Lil_1983	AY261361	CBW46692.1		0.0325014	0	0.118597	0.120299
Malawi_Lil_1983	AY261361	CBW46699.1	ASFV_G_ACD_00600	0.221706	0	0.0613334	0.0584412
Malawi_Lil_1983	AY261361	AJL34021.1		0.0042873	1.14426	0.248845	0.255166
Malawi_Lil_1983	AY261361	AJL34224.1		0.18992	0.073782	0.0555706	0.0523371
Malawi_Lil_1983	AY261361	AOO54437.1	hypothetical protein AFSV47Ss_0132	0.129309	0.350751	0.0283733	0.0261692
Malawi_Lil_1983	AY261361	QGM12670.1		0.36688	3.40385	0.197778	0.180039
Malawi_Lil_1983	AY261361	QGM12673.1		0.19354	0.605327	0.204244	0.193324
South_Africa_MGR_Mkuzi_1979	AY261362	CAN10254.1		0.189159	0	0.101166	0.0971823
South_Africa_MGR_Mkuzi_1979	AY261362	CAN10358.1		0.672764	0.612711	0.22552	0.191111
South_Africa_MGR_Mkuzi_1979	AY261362	CBW46699.1	ASFV_G_ACD_00600	0.230283	0	0.0610124	0.0572631
South_Africa_MGR_Mkuzi_1979	AY261362	AJL34013.1		1.09266	0.824565	0.20171	0.149292
South_Africa_MGR_Mkuzi_1979	AY261362	AJL34224.1		0.162677	0.305687	0.0562893	0.0523371
South_Africa_MGR_Mkuzi_1979	AY261362	AOO54420.1	hypothetical protein AFSV47Ss_0115	0.0182705	17.7481	0.123559	0.132385
South_Africa_MGR_Mkuzi_1979	AY261362	AOO54437.1	hypothetical protein AFSV47Ss_0132	0.104231	0.10254	0.0302276	0.0295818
South_Africa_MGR_Mkuzi_1979	AY261362	AOO54474.1	hypothetical protein AFSV47Ss_0169	-0.198781	0	0.0367355	0.0398227
South_Africa_MGR_Mkuzi_1979	AY261362	AOO54492.1	hypothetical protein AFSV47Ss_0187	-0.090254	0	0.0490376	0.0511993
South_Africa_MGR_Mkuzi_1979	AY261362	AOO54531.1	hypothetical protein AFSV47Ss_0226	0.134666	0.124533	0.0950178	0.0915971
South_Africa_MGR_Mkuzi_1979	AY261362	AOO54532.1	hypothetical protein AFSV47Ss_0227	0.134666	0.124533	0.0950178	0.0915971
South_Africa_MGR_Mkuzi_1979	AY261362	SPS73439.1		0.502525	0.32119	0.0836696	0.0660588
South_Africa_MGR_Mkuzi_1979	AY261362	QGM12669.1		1.11886	0.344513	0.193657	0.147547
South_Africa_MGR_Mkuzi_1979	AY261362	QGM12695.1		0.0424988	0	0.120943	0.118431
South_Africa_MGR_Mkuzi_1979	AY261362	QGM12778.1		-0.174298	0.104831	0.0646264	0.0659902
South_Africa_MGR_Mkuzi_1979	AY261362	QGM12793.1		0.925303	0.824565	0.230791	0.182876
South_Africa_KNP_Pretorisuskop_1996	AY261363	CAN10247.1		-0.169675	0.112548	0.0676219	0.0717278
South_Africa_KNP_Pretorisuskop_1996	AY261363	CAN10254.1		0.0598685	0	0.101021	0.0989737
South_Africa_KNP_Pretorisuskop_1996	AY261363	CAN10360.1	p285L	0.0119468	0.25211	0.147799	0.152124
South_Africa_KNP_Pretorisuskop_1996	AY261363	CBW46658.1	ASFV_G_ACD_00160, partial	0.0269999	0.079304	0.145216	0.144439
South_Africa_KNP_Pretorisuskop_1996	AY261363	CBW46699.1	ASFV_G_ACD_00600	0.248013	0	0.051294	0.0490133
South_Africa_KNP_Pretorisuskop_1996	AY261363	AJL34224.1		0.21122	0.383472	0.0561636	0.0523371
South_Africa_KNP_Pretorisuskop_1996	AY261363	AOO54368.1	hypothetical protein AFSV47Ss_0063	-0.17225	0	0.062125	0.0620224
South_Africa_KNP_Pretorisuskop_1996	AY261363	AOO54437.1	hypothetical protein AFSV47Ss_0132	0.104231	0	0.0302276	0.0295818
South_Africa_KNP_Pretorisuskop_1996	AY261363	AOO54492.1	hypothetical protein AFSV47Ss_0187	-0.146962	0.195856	0.0490376	0.0511993
South_Africa_KNP_Pretorisuskop_1996	AY261363	AOO54502.1	hypothetical protein AFSV47Ss_0197	-0.0632725	0.112552	0.0441798	0.0466596
South_Africa_KNP_Pretorisuskop_1996	AY261363	AOO54531.1	hypothetical protein AFSV47Ss_0226	0.108033	0	0.0950178	0.0982993
South_Africa_KNP_Pretorisuskop_1996	AY261363	AOO54532.1	hypothetical protein AFSV47Ss_0227	0.134666	0	0.0950178	0.0935102
South_Africa_KNP_Pretorisuskop_1996	AY261363	QGM12795.1		0.0474258	1.61447	0.203554	0.195443
South_Africa_KNP_Pretorisuskop_1996	AY261363	QGM12798.1		-0.189201	2.31709	0.237863	0.249972
South_Africa_KNP_Pretorisuskop_1996	AY261363	QGM12816.1		0.0840744	0	0.121347	0.120622
Malawi_Tengani_1962	AY261364	CAN10254.1		0.15853	0	0.101717	0.0913355
Malawi_Tengani_1962	AY261364	CBW46676.1	ASFV_G_ACD_00350	-0.0750726	0	0.178269	0.199351
Malawi_Tengani_1962	AY261364	CBW46699.1	ASFV_G_ACD_00600	0.154113	0	0.0511533	0.049012
Malawi_Tengani_1962	AY261364	AJL34224.1		0.177122	0.141615	0.0553998	0.0523371
Malawi_Tengani_1962	AY261364	AOO54368.1	hypothetical protein AFSV47Ss_0063	-0.17225	0	0.0786971	0.0826165
Malawi_Tengani_1962	AY261364	AOO54369.1	hypothetical protein AFSV47Ss_0064	-0.0421339	0	0.0341324	0.0364084
Malawi_Tengani_1962	AY261364	AOO54437.1	hypothetical protein AFSV47Ss_0132	0.164386	0.284631	0.0278305	0.027307
Malawi_Tengani_1962	AY261364	AOO54474.1	hypothetical protein AFSV47Ss_0169	-0.113279	0.135961	0.0367355	0.0398227
Malawi_Tengani_1962	AY261364	AOO54492.1	hypothetical protein AFSV47Ss_0187	-0.0962515	0	0.0513996	0.0534748
Malawi_Tengani_1962	AY261364	AOO54531.1	hypothetical protein AFSV47Ss_0226	0.15853	0	0.101717	0.0960652
Malawi_Tengani_1962	AY261364	AOO54532.1	hypothetical protein AFSV47Ss_0227	0.0903479	0	0.0979261	0.0960652
Malawi_Tengani_1962	AY261364	SPS73439.1		0.377486	0.382737	0.0843969	0.06609
Malawi_Tengani_1962	AY261364	QGM12695.1		0.0574237	0	0.1204	0.119859
Malawi_Tengani_1962	AY261364	QGM12696.1		0.292928	0	0.150954	0.14
South_Africa_Warmbaths_1987	AY261365	CAN10170.1		-0.262606	0	0.0367657	0.0417887
South_Africa_Warmbaths_1987	AY261365	CAN10247.1		-0.170324	0	0.0673501	0.071679
South_Africa_Warmbaths_1987	AY261365	CAN10254.1		0.158908	0	0.0982384	0.0921525
South_Africa_Warmbaths_1987	AY261365	CBW46699.1	ASFV_G_ACD_00600	0.221706	0	0.0609854	0.0581246
South_Africa_Warmbaths_1987	AY261365	AJL34224.1		0.215339	0.304587	0.0560882	0.0534748
South_Africa_Warmbaths_1987	AY261365	AOO54420.1	hypothetical protein AFSV47Ss_0115	-0.0620396	0.739687	0.111623	0.131877
South_Africa_Warmbaths_1987	AY261365	AOO54437.1	hypothetical protein AFSV47Ss_0132	0.164386	0.074884	0.0302276	0.0284441
South_Africa_Warmbaths_1987	AY261365	AOO54443.1	hypothetical protein AFSV47Ss_0138	-0.219555	0	0.0208352	0.0307196
South_Africa_Warmbaths_1987	AY261365	AOO54474.1	hypothetical protein AFSV47Ss_0169	-0.140198	0	0.0360018	0.0375471
South_Africa_Warmbaths_1987	AY261365	AOO54492.1	hypothetical protein AFSV47Ss_0187	-0.18415	0.010668	0.0543344	0.0546126
South_Africa_Warmbaths_1987	AY261365	AOO54531.1	hypothetical protein AFSV47Ss_0226	0.150213	0.044696	0.0982384	0.0921525
South_Africa_Warmbaths_1987	AY261365	AOO54532.1	hypothetical protein AFSV47Ss_0227	0.150213	0.044696	0.0982384	0.0949482
South_Africa_Warmbaths_1987	AY261365	QED21688.1		-0.219555	0	0.0269963	0.0307196
South_Africa_Warmbaths_1987	AY261365	QGM12695.1		0.0946664	0	0.120904	0.121749
South_Africa_Warmbaths_1987	AY261365	QGM12696.1		0.30842	0.003757	0.149406	0.141083
South_Africa_Warmbaths_1987	AY261365	QGM12778.1		-0.162572	0.057626	0.0673501	0.0682658
Namibia_Warthog_1980	AY261366	CAN10247.1		-0.176786	0	0.0628117	0.0681855
Namibia_Warthog_1980	AY261366	CAN10254.1		0.129508	0.142729	0.0960426	0.0927141
Namibia_Warthog_1980	AY261366	CBW46699.1	ASFV_G_ACD_00600	0.206398	0	0.0507211	0.0478734
Namibia_Warthog_1980	AY261366	AOO54368.1	hypothetical protein AFSV47Ss_0063	-0.134682	0	0.0620374	0.0639247
Namibia_Warthog_1980	AY261366	AOO54369.1	hypothetical protein AFSV47Ss_0064	-0.134682	0	0.0620374	0.0639247
Namibia_Warthog_1980	AY261366	AOO54437.1	hypothetical protein AFSV47Ss_0132	0.0704017	0.641511	0.0290467	0.0284441
Namibia_Warthog_1980	AY261366	AOO54474.1	hypothetical protein AFSV47Ss_0169	-0.140198	0	0.0360018	0.0375471
Namibia_Warthog_1980	AY261366	AOO54487.1	hypothetical protein AFSV47Ss_0182	-0.0844105	0	0.0451	0.0496027
Namibia_Warthog_1980	AY261366	AOO54492.1	hypothetical protein AFSV47Ss_0187	-0.0525341	0	0.0481833	0.0489238
Namibia_Warthog_1980	AY261366	AOO54502.1	hypothetical protein AFSV47Ss_0197	-0.008576	0	0.0424896	0.0466596
Namibia_Warthog_1980	AY261366	AOO54531.1	hypothetical protein AFSV47Ss_0226	0.129508	0.013873	0.0960426	0.0927141
Namibia_Warthog_1980	AY261366	AOO54532.1	hypothetical protein AFSV47Ss_0227	0.129508	0.013873	0.0969887	0.0943466
Namibia_Warthog_1980	AY261366	QGM12695.1		0.0699067	0	0.120313	0.119539
Namibia_Warthog_1980	AY261366	QGM12696.1		0.259351	0	0.146859	0.140356
Namibia_Warthog_1980	AY261366	QGM12778.1		-0.106543	0	0.0616466	0.0648525
Spain_E75_1975	FN557520	CBH29119.1	MGF 360-9L	0.314737	0.230075	0.0827569	0.0649641
Spain_E75_1975	FN557520	CBH29129.1	MGF 505-5R	0.0534357	0	0.116316	0.119557
Spain_E75_1975	FN557520	CBH29130.1	MGF 505-6R	0.339395	0	0.149985	0.138807
Spain_E75_1975	FN557520	CBH29171.1	BA71V-C62L	-0.133083	0	0.0400623	0.043235
Spain_E75_1975	FN557520	CBH29223.1	BA71V-QP383R (j11R)	-0.0525341	0	0.0379014	0.0398217
Spain_E75_1975	FN557520	CBH29240.1	BA71V-I329L (k11L)	0	0.69475	0	0
Spain_E75_1975	FN557520	CBH29256.1	BA71V-DP71L (l14L, NLS)	0.210106	0	0.0955811	0.089363
Spain_E75_1975	FN557520	CBW46676.1	ASFV_G_ACD_00350	-0.0546426	0	0.0982477	0.111189
Spain_E75_1975	FN557520	CBW46699.1	ASFV_G_ACD_00600	0.109109	0	0.0563194	0.054614
Spain_E75_1975	FN557520	AJL34224.1		0.185217	0.159979	0.0551586	0.0523371
Spain_E75_1975	FN557520	AOO54368.1	hypothetical protein AFSV47Ss_0063	-0.104517	0.17709	0.0595044	0.0648938
Spain_E75_1975	FN557520	AOO54437.1	hypothetical protein AFSV47Ss_0132	0.179932	0.138924	0.0302729	0.0284448
Spain_E75_1975	FN557520	AOO54474.1	hypothetical protein AFSV47Ss_0169	-0.140198	0	0.0360018	0.0375471
Spain_E75_1975	FN557520	AOO54492.1	hypothetical protein AFSV47Ss_0187	-0.175375	0	0.0503783	0.0535013
Spain_E75_1975	FN557520	AOO54531.1	hypothetical protein AFSV47Ss_0226	0.210106	0	0.0955811	0.089363
Spain_E75_1975	FN557520	AOO54532.1	hypothetical protein AFSV47Ss_0227	0.210106	0	0.0997999	0.0971823
Russia_Georgia_2007	FR682468	CBW46655.1	MGF_110-4L	-0.249816	11.4153	0.166192	0.173914
Russia_Georgia_2007	FR682468	CBW46682.1	MGF_360-9L	0.811428	0.527909	0.0810978	0.0659902
Russia_Georgia_2007	FR682468	CBW46693.1	MGF_505-5R	0.0514764	0	0.121541	0.117455
Russia_Georgia_2007	FR682468	CBW46694.1	MGF_505-6R	0.268768	0	0.149722	0.138128
Russia_Georgia_2007	FR682468	CBW46699.1	ASFV_G_ACD_00600	0.109109	0	0.0563194	0.054614
Russia_Georgia_2007	FR682468	CBW46702.1	A118R	-0.184185	0.579426	0.0857226	0.0972576
Russia_Georgia_2007	FR682468	CBW46711.1	F778R	0.0964339	0.042659	0.0540479	0.0523371
Russia_Georgia_2007	FR682468	CBW46818.1	ASFV_G_ACD_01870	-0.126486	0	0.0632147	0.0671984
Russia_Georgia_2007	FR682468	CBW46823.1	DP71L	0.0874309	0	0.0906017	0.088246
Russia_Georgia_2007	FR682468	CAN10247.1		-0.124715	0.089896	0.0617016	0.067128
Russia_Georgia_2007	FR682468	AJL34224.1		0.177122	0.042659	0.0562943	0.0523371
Russia_Georgia_2007	FR682468	AOO54368.1	hypothetical protein AFSV47Ss_0063	-0.232236	0.707804	0.0597403	0.0588289
Russia_Georgia_2007	FR682468	AOO54369.1	hypothetical protein AFSV47Ss_0064	-0.232236	0	0.0597403	0.0588289
Russia_Georgia_2007	FR682468	AOO54437.1	hypothetical protein AFSV47Ss_0132	0.18195	0.025295	0.0300015	0.0261685
Russia_Georgia_2007	FR682468	AOO54474.1	hypothetical protein AFSV47Ss_0169	-0.251896	0	0.0365244	0.0386849
Russia_Georgia_2007	FR682468	AOO54531.1	hypothetical protein AFSV47Ss_0226	0.0973227	0	0.0997999	0.0971823
Russia_Georgia_2007	FR682468	QED21726.1		-0.191795	0.192619	0.0422484	0.043235
Russia_Kashino_2013	KJ747406	CAN10247.1		-0.149396	0	0.0598221	0.0651565
Russia_Kashino_2013	KJ747406	CAN10254.1		0.0427192	0.110761	0.0904065	0.088246
Russia_Kashino_2013	KJ747406	CBW46649.1	ASFV_G_ACD_00070, partial	-0.207271	0	0.0767231	0.101954
Russia_Kashino_2013	KJ747406	CBW46699.1	ASFV_G_ACD_00600	0.206398	0	0.0507211	0.0478734
Russia_Kashino_2013	KJ747406	AJL34224.1		0.205999	0.265643	0.0546409	0.0523371
Russia_Kashino_2013	KJ747406	AOO54376.1	hypothetical protein AFSV47Ss_0071	-0.214439	0.265643	0.0306749	0.0375462
Russia_Kashino_2013	KJ747406	AOO54437.1	hypothetical protein AFSV47Ss_0132	0.104231	0.23153	0.0302276	0.0295818
Russia_Kashino_2013	KJ747406	AOO54474.1	hypothetical protein AFSV47Ss_0169	-0.173756	0.11491	0.0360018	0.0409605
Russia_Kashino_2013	KJ747406	AOO54487.1	hypothetical protein AFSV47Ss_0182	-0.0654017	0	0.0433353	0.0484779
Russia_Kashino_2013	KJ747406	AOO54492.1	hypothetical protein AFSV47Ss_0187	-0.13663	0.000288	0.0514073	0.0535013
Russia_Kashino_2013	KJ747406	AOO54502.1	hypothetical protein AFSV47Ss_0197	-0.235469	0.355295	0.0422092	0.0452961
Russia_Kashino_2013	KJ747406	AOO54531.1	hypothetical protein AFSV47Ss_0226	0.0927138	0	0.0985312	0.0935663
Russia_Kashino_2013	KJ747406	SPS73439.1		0.390335	0.657058	0.0840013	0.0662272
Russia_Kashino_2013	KJ747406	AXZ95928.1	ACD_01940	-0.0334778	0	0.0541457	0.0546549
Russia_Kashino_2013	KJ747406	QGM12695.1		0.0341255	0	0.117668	0.118695
Russia_Kashino_2013	KJ747406	QGM12696.1		0.294613	0	0.147555	0.139945
Italy_26544_OG10_2010	KM102979	AKM05533.1	X64R	0.230847	1.70595	0.139156	0.127406
Italy_26544_OG10_2010	KM102979	AJZ77090.1	MGF 360-9L	0.790816	0.512563	0.0805458	0.0637444
Italy_26544_OG10_2010	KM102979	AJZ77066.1	MGF 505-5R	0.0514764	0	0.120537	0.117455
Italy_26544_OG10_2010	KM102979	AJZ77060.1	MGF 505-6R	0.314104	0.017481	0.150578	0.138128
Italy_26544_OG10_2010	KM102979	AKM05534.1	ASFV26544 00600	0.196153	0	0.0490929	0.0467336
Italy_26544_OG10_2010	KM102979	AJZ77051.1	ribonucleotide reductase of class Ia alpha subunit	0.0964339	0.212612	0.0540479	0.0523371
Italy_26544_OG10_2010	KM102979	AJZ77187.1	DP71L	0.184145	0	0.103634	0.088246
Italy_26544_OG10_2010	KM102979	AJL34224.1		0.177122	0.226342	0.0562943	0.0523371
Italy_26544_OG10_2010	KM102979	AOO54368.1	hypothetical protein AFSV47Ss_0063	-0.170116	0	0.0735596	0.0772082
Italy_26544_OG10_2010	KM102979	AOO54369.1	hypothetical protein AFSV47Ss_0064	-0.170116	0	0.0540107	0.0540363
Italy_26544_OG10_2010	KM102979	AOO54437.1	hypothetical protein AFSV47Ss_0132	0.195799	0.447098	0.0313182	0.0295818
Italy_26544_OG10_2010	KM102979	AOO54474.1	hypothetical protein AFSV47Ss_0169	-0.140198	0	0.0360018	0.0375471
Italy_26544_OG10_2010	KM102979	AOO54492.1	hypothetical protein AFSV47Ss_0187	-0.174308	0	0.0497451	0.052363
Italy_26544_OG10_2010	KM102979	AOO54502.1	hypothetical protein AFSV47Ss_0197	-0.0680599	0.24384	0.0424192	0.0455215
Italy_26544_OG10_2010	KM102979	AOO54531.1	hypothetical protein AFSV47Ss_0226	0.184145	0	0.0997999	0.088246
Italy_26544_OG10_2010	KM102979	AOO54532.1	hypothetical protein AFSV47Ss_0227	0.184145	0	0.0997999	0.0971823
Kenya_Tk1_2005	KM111294	AJL34012.1	MGF 110-1L	0.324213	0.687538	0.165203	0.157349
Kenya_Tk1_2005	KM111294	AJL34014.1	MGF 110-3L	0.574844	0.702626	0.274994	0.238179
Kenya_Tk1_2005	KM111294	AJL34015.1	MGF 110-4L	0.51823	0.725557	0.27746	0.249593
Kenya_Tk1_2005	KM111294	AJL34034.1	MGF 360-9L	0.792439	0.327894	0.0804886	0.0648827
Kenya_Tk1_2005	KM111294	AJL34043.1	MGF 505-4R	0.0660201	0	0.11978	0.1179
Kenya_Tk1_2005	KM111294	AJL34044.1	MGF 505-5R	0.286733	0	0.151435	0.136532
Kenya_Tk1_2005	KM111294	AJL34059.1	BA71V-F778R	0.0699748	0.150887	0.0534147	0.0523371
Kenya_Tk1_2005	KM111294	AJL34169.1	BA71V-DP71L (I14L, NLS)	0.0934804	0.016838	0.0920901	0.0897595
Kenya_Tk1_2005	KM111294	CBW46651.1	ASFV_G_ACD_00090	0.97825	0.536662	0.19164	0.143126
Kenya_Tk1_2005	KM111294	CBW46658.1	ASFV_G_ACD_00160, partial	0.0920368	0.298966	0.265884	0.259997
Kenya_Tk1_2005	KM111294	CBW46691.1	ASFV_G_ACD_00520	0.150025	0	0.126744	0.117086
Kenya_Tk1_2005	KM111294	AOO54437.1	hypothetical protein AFSV47Ss_0132	0.0704017	0	0.0290467	0.0284441
Kenya_Tk1_2005	KM111294	QGM12670.1		0.596955	0.748485	0.27746	0.246212
Kenya_Bus_2006	KM111295	AJL34177.1	MGF 110-1L	0.217858	1.86105	0.16617	0.176134
Kenya_Bus_2006	KM111295	AJL34178.1	MGF 110-2L	0.17479	23.6313	0.217755	0.213276
Kenya_Bus_2006	KM111295	AJL34198.1	MGF 360-9L	0.46107	0.343497	0.0831087	0.0651163
Kenya_Bus_2006	KM111295	AJL34208.1	MGF 505-4R	0.047392	0	0.11777	0.118327
Kenya_Bus_2006	KM111295	AJL34209.1	MGF 505-5R	0.281461	0	0.1488	0.138844
Kenya_Bus_2006	KM111295	AJL34224.1	BA71V-F778R	0.0176201	0.064718	0.0526861	0.0523371
Kenya_Bus_2006	KM111295	AJL34324.1	MGF 100-3L	-0.222953	0.115934	0.0647369	0.0705413
Kenya_Bus_2006	KM111295	AJL34330.1	I12R	0.347236	13.4971	0.20381	0.20299
Kenya_Bus_2006	KM111295	CBW46691.1	ASFV_G_ACD_00520	-0.131845	0	0.137434	0.124643
Kenya_Bus_2006	KM111295	AOO54376.1	hypothetical protein AFSV47Ss_0071	-0.30689	0.088088	0.0281622	0.0364084
Kenya_Bus_2006	KM111295	AOO54437.1	hypothetical protein AFSV47Ss_0132	0.164386	0.068273	0.0278305	0.027307
Kenya_Bus_2006	KM111295	AOO54474.1	hypothetical protein AFSV47Ss_0169	-0.204026	0.168184	0.0363134	0.0420983
Portugal_L60_1960	KM262844	AIY22195.1	pMGF 110-1L	-0.212553	0.7165	0.197041	0.215346
Portugal_L60_1960	KM262844	AIY22209.1	pMGF 360-9L	0.569123	0.396541	0.0831822	0.0660865
Portugal_L60_1960	KM262844	AIY22219.1	pMGF 505-5R	0.0412942	0	0.119135	0.119465
Portugal_L60_1960	KM262844	AIY22220.1	pMGF 505-7R	0.272828	0	0.146143	0.141129
Portugal_L60_1960	KM262844	AIY22236.1	ribonucleotide reductase large subunit	0.0326255	0.098693	0.0515855	0.0523371
Portugal_L60_1960	KM262844	AIY22262.1	pC62L	-0.133083	0	0.0426604	0.0443727
Portugal_L60_1960	KM262844	AIY22346.1	pDP71L	0.184145	0	0.0955811	0.088246
Portugal_L60_1960	KM262844	CBW46699.1	ASFV_G_ACD_00600	0.24333	0.061661	0.0608423	0.0568896
Portugal_L60_1960	KM262844	AJL34224.1		0.16121	0.112289	0.0546409	0.0523371
Portugal_L60_1960	KM262844	AOO54368.1	hypothetical protein AFSV47Ss_0063	-0.150758	0	0.0620224	0.062851
Portugal_L60_1960	KM262844	AOO54437.1	hypothetical protein AFSV47Ss_0132	0.0704017	0.690684	0.0290467	0.0284441
Portugal_L60_1960	KM262844	AOO54474.1	hypothetical protein AFSV47Ss_0169	-0.204026	0	0.0362531	0.0398227
Portugal_L60_1960	KM262844	AOO54502.1	hypothetical protein AFSV47Ss_0197	-0.131709	0	0.0465154	0.0464285
Portugal_L60_1960	KM262844	AOO54531.1	hypothetical protein AFSV47Ss_0226	0.184145	0	0.0955811	0.088246
Portugal_L60_1960	KM262844	AOO54532.1	hypothetical protein AFSV47Ss_0227	0.184145	0	0.0997999	0.0971823
Portugal_L60_1960	KM262844	QGM12778.1		-0.176786	0.232681	0.0616017	0.0659875
Portugal_NHV_1968	KM262845	AIY22362.1	p285L	0.643161	0.162365	0.272739	0.239731
Portugal_NHV_1968	KM262845	AIY22370.1	pMGF 300-1L	1.20267	0.054565	0.184087	0.151203
Portugal_NHV_1968	KM262845	AIY22374.1	pMGF 360-8L	0.743612	0	0.161898	0.135522
Portugal_NHV_1968	KM262845	AIY22375.1	pMGF 360-9L	0.352527	0	0.168713	0.146333
Portugal_NHV_1968	KM262845	AIY22379.1	pMGF 505-7R	0.2972	0	0.149767	0.14
Portugal_NHV_1968	KM262845	AIY22395.1	ribonucleotide reductase large subunit	0.0699748	0.156129	0.0534147	0.0523371
Portugal_NHV_1968	KM262845	AIY22505.1	pDP71L	0.207755	0	0.092251	0.089363
Portugal_NHV_1968	KM262845	CBW46658.1	ASFV_G_ACD_00160, partial	0.643161	0	0.30191	0.242137
Portugal_NHV_1968	KM262845	CBW46699.1	ASFV_G_ACD_00600	0.248013	0.021529	0.051294	0.0490133
Portugal_NHV_1968	KM262845	AJL34224.1		0.215339	0.101025	0.0560882	0.0534748
Portugal_NHV_1968	KM262845	AOO54437.1	hypothetical protein AFSV47Ss_0132	0.104231	0	0.0302276	0.0284448
Portugal_NHV_1968	KM262845	AOO54531.1	hypothetical protein AFSV47Ss_0226	0.165607	0	0.0946372	0.09048
Portugal_NHV_1968	KM262845	AOO54532.1	hypothetical protein AFSV47Ss_0227	0.165607	0	0.0990582	0.0958265
Portugal_NHV_1968	KM262845	QGM12684.1		0.743612	0	0.161898	0.135522
Portugal_NHV_1968	KM262845	QGM12685.1		0.747694	0	0.172967	0.145438
Spain_BA71_1971	KP055815	AKO62696.1	J64R	0.216209	0	0.122679	0.12686
Spain_BA71_1971	KP055815	AKO62700.1	pBA71-A125L	0.811428	0.054042	0.0808532	0.0662883
Spain_BA71_1971	KP055815	AKO62710.1	pA498R	0.0265522	0	0.118072	0.119663
Spain_BA71_1971	KP055815	AKO62711.1	pBA71-A528R	0.310479	0.029293	0.149265	0.137781
Spain_BA71_1971	KP055815	AKO62727.1	pF778R	0.0643108	0.078681	0.0534147	0.0523371
Spain_BA71_1971	KP055815	AKO62752.1	pC62L	-0.133083	0.332369	0.0406955	0.0443727
Spain_BA71_1971	KP055815	AKO62829.1	pDP146L	-0.169316	0.133095	0.0617418	0.0665748
Spain_BA71_1971	KP055815	AKO62836.1	pDP71L	0.194372	0	0.092479	0.088246
Spain_BA71_1971	KP055815	CBW46699.1	ASFV_G_ACD_00600	0.2212	0	0.0521182	0.0501531
Spain_BA71_1971	KP055815	AJL34224.1		0.215339	0.070893	0.0560882	0.0534748
Spain_BA71_1971	KP055815	AOO54437.1	hypothetical protein AFSV47Ss_0132	0.164386	0.133233	0.0302276	0.0284441
Spain_BA71_1971	KP055815	AOO54474.1	hypothetical protein AFSV47Ss_0169	-0.167623	0	0.0367858	0.0420983
Spain_BA71_1971	KP055815	AOO54492.1	hypothetical protein AFSV47Ss_0187	-0.135777	0	0.052676	0.0534748
Spain_BA71_1971	KP055815	AOO54531.1	hypothetical protein AFSV47Ss_0226	0.16023	0	0.0969502	0.0915971
Spain_BA71_1971	KP055815	AOO54532.1	hypothetical protein AFSV47Ss_0227	0.194372	0	0.0970771	0.0949482
Spain_BA71_1971	KP055815	QGM12778.1		-0.169316	0	0.0617881	0.0649012
Russia_Odintsovo_2014	KP843857	CAN10170.1		-0.133083	0	0.0426604	0.0443727
Russia_Odintsovo_2014	KP843857	CAN10247.1		-0.169682	0	0.0617317	0.0648525
Russia_Odintsovo_2014	KP843857	CAN10254.1		0.0427192	0	0.0904065	0.088246
Russia_Odintsovo_2014	KP843857	CBW46699.1	ASFV_G_ACD_00600	0.24333	0	0.0608423	0.0568896
Russia_Odintsovo_2014	KP843857	AJL34224.1		0.199797	0.148581	0.0550731	0.0523371
Russia_Odintsovo_2014	KP843857	AOO54368.1	hypothetical protein AFSV47Ss_0063	-0.191679	0.110628	0.0581778	0.0588289
Russia_Odintsovo_2014	KP843857	AOO54369.1	hypothetical protein AFSV47Ss_0064	-0.191679	0.113805	0.0581778	0.0588289
Russia_Odintsovo_2014	KP843857	AOO54437.1	hypothetical protein AFSV47Ss_0132	0.195799	0.423474	0.0313182	0.0295818
Russia_Odintsovo_2014	KP843857	AOO54443.1	hypothetical protein AFSV47Ss_0138	-0.180672	0	0.0193628	0.0295818
Russia_Odintsovo_2014	KP843857	AOO54474.1	hypothetical protein AFSV47Ss_0169	-0.140198	0	0.0360018	0.0375471
Russia_Odintsovo_2014	KP843857	AOO54492.1	hypothetical protein AFSV47Ss_0187	-0.13885	0	0.0513733	0.0535013
Russia_Odintsovo_2014	KP843857	AOO54531.1	hypothetical protein AFSV47Ss_0226	0.0927138	0	0.0985312	0.0935663
Russia_Odintsovo_2014	KP843857	SPS73439.1		0.295888	0.577047	0.0799659	0.0659902
Russia_Odintsovo_2014	KP843857	QED21688.1		-0.180672	0	0.0286246	0.0307196
Russia_Odintsovo_2014	KP843857	QGM12695.1		0.0291379	0	0.119263	0.117455
Russia_Odintsovo_2014	KP843857	QGM12696.1		0.299517	0	0.150405	0.137881
Italy_47_Ss_2008_2008	KX354450	AOO54328.1	pX64R	0.0039236	0	0.103922	0.125673
Italy_47_Ss_2008_2008	KX354450	AOO54335.1	pMGF 360-9L	0.483219	0.315629	0.0840013	0.0650854
Italy_47_Ss_2008_2008	KX354450	AOO54354.1	pMGF 505-5R	0.0205827	0	0.1195	0.119494
Italy_47_Ss_2008_2008	KX354450	AOO54355.1	pMGF 505-6R	0.261357	0	0.148859	0.140356
Italy_47_Ss_2008_2008	KX354450	AOO54369.1	hypothetical protein AFSV47Ss_0064	-0.232236	0	0.0558986	0.0538656
Italy_47_Ss_2008_2008	KX354450	AOO54375.1	F778R	0.099316	0.035574	0.0535856	0.0523371
Italy_47_Ss_2008_2008	KX354450	AOO54437.1	hypothetical protein AFSV47Ss_0132	0.184915	0	0.0300015	0.0261685
Italy_47_Ss_2008_2008	KX354450	AOO54492.1	hypothetical protein AFSV47Ss_0187	-0.18415	0.237647	0.0543344	0.0546126
Italy_47_Ss_2008_2008	KX354450	AOO54523.1	pMGF 100-3L	-0.195697	0	0.0659028	0.0683121
Italy_47_Ss_2008_2008	KX354450	AOO54531.1	hypothetical protein AFSV47Ss_0226	0.129508	0	0.0960426	0.0927141
Italy_47_Ss_2008_2008	KX354450	AOO54532.1	hypothetical protein AFSV47Ss_0227	0.129508	0	0.0969887	0.0943466
Italy_47_Ss_2008_2008	KX354450	AOO54533.1	pDP71L	0	0	0	0
Italy_47_Ss_2008_2008	KX354450	CAN10254.1		0.129508	0	0.0960426	0.0927141
Italy_47_Ss_2008_2008	KX354450	CBW46699.1	ASFV_G_ACD_00600	0.247212	0	0.0578189	0.0567024
Italy_47_Ss_2008_2008	KX354450	AJL34224.1		0.184328	0	0.0564903	0.0523371
Italy_47_Ss_2008_2008	KX354450	QED21726.1		-0.193674	0	0.0416152	0.043235
Italy_47_Ss_2008_2008	KX354450	QGM12778.1		-0.160592	0	0.0617016	0.067128
Estonia_2014	LS478113	SPS73421.1	ASFV G ACD 01940 EST-A CDS	-0.132631	13.5647	0.106306	0.112761
Estonia_2014	LS478113	SPS73423.1	DP71L EST-A CDS	0.0583488	0	0.0950056	0.0935102
Estonia_2014	LS478113	SPS73439.1	MGF 360-9L CDS	0.404801	0.285576	0.0804886	0.0648827
Estonia_2014	LS478113	SPS73450.1	MGF 505-5R CDS	0.0198449	0	0.118781	0.119494
Estonia_2014	LS478113	SPS73451.1	MGF 505-6R CDS	0.261357	0	0.14855	0.140356
Estonia_2014	LS478113	SPS73456.1	ASFV G ACD 00600 CDS	0.220759	0	0.051294	0.0490133
Estonia_2014	LS478113	SPS73468.1	F778R CDS	0.0176201	0	0.0523092	0.0523371
Estonia_2014	LS478113	SPS73579.1	DP71L EST-B CDS	0.0482198	0	0.0928219	0.0915971
Estonia_2014	LS478113	AJL34224.1		0.224626	0	0.0560782	0.0523371
Estonia_2014	LS478113	AOO54368.1	hypothetical protein AFSV47Ss_0063	-0.104955	0	0.0597865	0.0652074
Estonia_2014	LS478113	AOO54437.1	hypothetical protein AFSV47Ss_0132	0.104231	0.136781	0.0302276	0.0295818
Estonia_2014	LS478113	AOO54474.1	hypothetical protein AFSV47Ss_0169	-0.140198	0	0.0360018	0.0375471
Estonia_2014	LS478113	AOO54502.1	hypothetical protein AFSV47Ss_0197	-0.0684045	0	0.0426403	0.0466596
Estonia_2014	LS478113	AOO54531.1	hypothetical protein AFSV47Ss_0226	0.108033	0	0.0950056	0.0915971
Estonia_2014	LS478113	AXZ95928.1	ACD_01940	-0.107943	0.083849	0.0515954	0.0489066
Poland_Pol16_20186_o7_2016-2017	MG939583	AXZ95795.1	MGF_360-9L	0.404801	0.299133	0.0804886	0.0648827
Poland_Pol16_20186_o7_2016-2017	MG939583	AXZ95806.1	MGF_505-5R	0.0198449	0	0.118781	0.119494
Poland_Pol16_20186_o7_2016-2017	MG939583	AXZ95807.1	MGF_505-6R	0.261357	0	0.14855	0.140356
Poland_Pol16_20186_o7_2016-2017	MG939583	AXZ95821.1	F778R	0.0176201	0.268958	0.0523092	0.0523371
Poland_Pol16_20186_o7_2016-2017	MG939583	AXZ95921.1	ACD_01870	0.0120858	0.208999	0.0631124	0.0622909
Poland_Pol16_20186_o7_2016-2017	MG939583	AXZ95926.1	DP71L	0.0921483	0.25396	0.0929244	0.09048
Poland_Pol16_20186_o7_2016-2017	MG939583	AXZ95928.1	ACD_01940	-0.143475	0.676936	0.0508174	0.0477009
Poland_Pol16_20186_o7_2016-2017	MG939583	CAN10247.1		-0.151912	0.34717	0.06535	0.0682658
Poland_Pol16_20186_o7_2016-2017	MG939583	CBW46699.1	ASFV_G_ACD_00600	0.220759	0.007847	0.051294	0.0490133
Poland_Pol16_20186_o7_2016-2017	MG939583	AJL34224.1		0.224626	0.178601	0.0560782	0.0523371
Poland_Pol16_20186_o7_2016-2017	MG939583	AOO54368.1	hypothetical protein AFSV47Ss_0063	-0.104955	0.010795	0.0597865	0.0652074
Poland_Pol16_20186_o7_2016-2017	MG939583	AOO54369.1	hypothetical protein AFSV47Ss_0064	-0.205465	0	0.0597865	0.0652074
Poland_Pol16_20186_o7_2016-2017	MG939583	AOO54376.1	hypothetical protein AFSV47Ss_0071	-0.186973	0.297536	0.0269863	0.0352706
Poland_Pol16_20186_o7_2016-2017	MG939583	AOO54437.1	hypothetical protein AFSV47Ss_0132	0.104231	0	0.0302276	0.0295818
Poland_Pol16_20186_o7_2016-2017	MG939583	AOO54474.1	hypothetical protein AFSV47Ss_0169	-0.140198	0	0.0360018	0.0375471
Poland_Pol16_20186_o7_2016-2017	MG939583	AOO54502.1	hypothetical protein AFSV47Ss_0197	-0.0684045	0	0.0426403	0.0466596
Poland_Pol16_20186_o7_2016-2017	MG939583	AOO54531.1	hypothetical protein AFSV47Ss_0226	0.0973754	0	0.0990361	0.0971823
Poland_Pol16_20538_o9_2016-2017	MG939584	CAN10170.1		-0.222068	0	0.0417056	0.0443727
Poland_Pol16_20538_o9_2016-2017	MG939584	CAN10247.1		-0.173507	0.095182	0.0614805	0.0648525
Poland_Pol16_20538_o9_2016-2017	MG939584	CAN10254.1		0.0874309	0	0.0906017	0.088246
Poland_Pol16_20538_o9_2016-2017	MG939584	CBW46699.1	ASFV_G_ACD_00600	0.217458	0	0.0496658	0.0467336
Poland_Pol16_20538_o9_2016-2017	MG939584	CBW46704.1		-0.277589	0	0.0502739	0.0546126
Poland_Pol16_20538_o9_2016-2017	MG939584	AJL34224.1		0.205999	0.263338	0.0546409	0.0523371
Poland_Pol16_20538_o9_2016-2017	MG939584	AOO54376.1	hypothetical protein AFSV47Ss_0071	-0.214439	0.213288	0.0306749	0.0375462
Poland_Pol16_20538_o9_2016-2017	MG939584	AOO54437.1	hypothetical protein AFSV47Ss_0132	0.0704017	0	0.0290467	0.0284441
Poland_Pol16_20538_o9_2016-2017	MG939584	AOO54474.1	hypothetical protein AFSV47Ss_0169	-0.140198	0.02517	0.0360018	0.0375471
Poland_Pol16_20538_o9_2016-2017	MG939584	AOO54487.1	hypothetical protein AFSV47Ss_0182	-0.27053	0	0.0447118	0.0484754
Poland_Pol16_20538_o9_2016-2017	MG939584	AOO54531.1	hypothetical protein AFSV47Ss_0226	0.0973227	0	0.0997999	0.0971823
Poland_Pol16_20538_o9_2016-2017	MG939584	SPS73439.1		0.424553	0.585466	0.0804886	0.0661817
Poland_Pol16_20538_o9_2016-2017	MG939584	QED21538.1		-0.282077	0.869494	0.139476	0.148119
Poland_Pol16_20538_o9_2016-2017	MG939584	QED21688.1		-0.260802	0.009102	0.0286145	0.0307196
Poland_Pol16_20538_o9_2016-2017	MG939584	QGM12695.1		0.0205827	0	0.119936	0.119665
Poland_Pol16_20538_o9_2016-2017	MG939584	QGM12696.1		0.239999	0	0.149589	0.138128
Poland_Pol16_20540_o10_2016-2017	MG939585	CAN10170.1		-0.254553	0	0.0410975	0.043235
Poland_Pol16_20540_o10_2016-2017	MG939585	CAN10247.1		-0.149204	0.126738	0.0657018	0.0694035
Poland_Pol16_20540_o10_2016-2017	MG939585	CAN10254.1		0.114185	0	0.0925194	0.089363
Poland_Pol16_20540_o10_2016-2017	MG939585	CBW46699.1	ASFV_G_ACD_00600	0.196153	0.373449	0.0490929	0.0467336
Poland_Pol16_20540_o10_2016-2017	MG939585	CBW46818.1	ASFV_G_ACD_01870	-0.272264	0.210361	0.0637685	0.0622042
Poland_Pol16_20540_o10_2016-2017	MG939585	AJL34224.1		0.184328	0.274102	0.0562993	0.0523371
Poland_Pol16_20540_o10_2016-2017	MG939585	AOO54437.1	hypothetical protein AFSV47Ss_0132	0.0704017	0	0.0290467	0.0284441
Poland_Pol16_20540_o10_2016-2017	MG939585	AOO54443.1	hypothetical protein AFSV47Ss_0138	-0.165952	0.198793	0.0194181	0.0273063
Poland_Pol16_20540_o10_2016-2017	MG939585	AOO54474.1	hypothetical protein AFSV47Ss_0169	-0.140198	0	0.0360018	0.0375471
Poland_Pol16_20540_o10_2016-2017	MG939585	AOO54492.1	hypothetical protein AFSV47Ss_0187	-0.175375	0	0.0503783	0.0535013
Poland_Pol16_20540_o10_2016-2017	MG939585	AOO54531.1	hypothetical protein AFSV47Ss_0226	0.114185	0	0.0925194	0.089363
Poland_Pol16_20540_o10_2016-2017	MG939585	SPS73439.1		0.454025	0.381212	0.0804886	0.0661783
Poland_Pol16_20540_o10_2016-2017	MG939585	AXZ95928.1	ACD_01940	0.134464	0	0.0523733	0.05014
Poland_Pol16_20540_o10_2016-2017	MG939585	QED21688.1		-0.174646	0.110119	0.0269863	0.0307196
Poland_Pol16_20540_o10_2016-2017	MG939585	QGM12695.1		0.0186522	0	0.119453	0.118523
Poland_Pol16_20540_o10_2016-2017	MG939585	QGM12696.1		0.239999	0	0.145165	0.138128
Poland_Pol16_29413_o23_2016-2017	MG939586	CAN10247.1		-0.169515	0.249374	0.0609779	0.0639506
Poland_Pol16_29413_o23_2016-2017	MG939586	CAN10254.1		0.0875092	0	0.0906017	0.088246
Poland_Pol16_29413_o23_2016-2017	MG939586	CBW46699.1	ASFV_G_ACD_00600	0.248013	0	0.051294	0.0478734
Poland_Pol16_29413_o23_2016-2017	MG939586	CBW46704.1		-0.277589	0	0.0505453	0.0557504
Poland_Pol16_29413_o23_2016-2017	MG939586	AJL34224.1		0.24914	0.210347	0.0560782	0.0523371
Poland_Pol16_29413_o23_2016-2017	MG939586	AOO54437.1	hypothetical protein AFSV47Ss_0132	0.104231	0.117586	0.0302276	0.0284448
Poland_Pol16_29413_o23_2016-2017	MG939586	AOO54474.1	hypothetical protein AFSV47Ss_0169	-0.140198	0.294632	0.0360018	0.0375471
Poland_Pol16_29413_o23_2016-2017	MG939586	AOO54487.1	hypothetical protein AFSV47Ss_0182	-0.278859	0	0.0435532	0.047786
Poland_Pol16_29413_o23_2016-2017	MG939586	AOO54492.1	hypothetical protein AFSV47Ss_0187	-0.211004	8e-06	0.0507401	0.052363
Poland_Pol16_29413_o23_2016-2017	MG939586	AOO54502.1	hypothetical protein AFSV47Ss_0197	-0.0684045	0	0.0412734	0.0466596
Poland_Pol16_29413_o23_2016-2017	MG939586	AOO54531.1	hypothetical protein AFSV47Ss_0226	0.0961336	0	0.0997999	0.0971823
Poland_Pol16_29413_o23_2016-2017	MG939586	SPS73439.1		0.42436	0.345811	0.0804886	0.0649884
Poland_Pol16_29413_o23_2016-2017	MG939586	QED21538.1		-0.282077	0.938761	0.139476	0.148119
Poland_Pol16_29413_o23_2016-2017	MG939586	QED21688.1		-0.236586	0	0.0276295	0.0295818
Poland_Pol16_29413_o23_2016-2017	MG939586	QGM12695.1		0.0338409	0	0.12045	0.119494
Poland_Pol16_29413_o23_2016-2017	MG939586	QGM12696.1		0.239999	0	0.149993	0.138807
Poland_Pol17_03029_C201_2016-2017	MG939587	AXZ95983.1	MGF_360-9L	0.404801	0.195593	0.0804886	0.0648827
Poland_Pol17_03029_C201_2016-2017	MG939587	AXZ95994.1	MGF_505-5R	0.0198449	0	0.118781	0.119494
Poland_Pol17_03029_C201_2016-2017	MG939587	AXZ95995.1	MGF_505-6R	0.261357	0	0.14855	0.140356
Poland_Pol17_03029_C201_2016-2017	MG939587	AXZ96009.1	F778R	0.0176201	0.284103	0.0523092	0.0523371
Poland_Pol17_03029_C201_2016-2017	MG939587	CAN10247.1		-0.149204	0.103664	0.0657018	0.0694035
Poland_Pol17_03029_C201_2016-2017	MG939587	CAN10254.1		0.114185	0	0.0925194	0.089363
Poland_Pol17_03029_C201_2016-2017	MG939587	CBW46699.1	ASFV_G_ACD_00600	0.220759	0	0.051294	0.0490133
Poland_Pol17_03029_C201_2016-2017	MG939587	AJL34224.1		0.224626	0.262273	0.0560782	0.0523371
Poland_Pol17_03029_C201_2016-2017	MG939587	AOO54368.1	hypothetical protein AFSV47Ss_0063	-0.104955	9e-06	0.0597865	0.0652074
Poland_Pol17_03029_C201_2016-2017	MG939587	AOO54369.1	hypothetical protein AFSV47Ss_0064	-0.205465	0	0.0597865	0.0652074
Poland_Pol17_03029_C201_2016-2017	MG939587	AOO54376.1	hypothetical protein AFSV47Ss_0071	-0.186973	0	0.0269863	0.0352706
Poland_Pol17_03029_C201_2016-2017	MG939587	AOO54437.1	hypothetical protein AFSV47Ss_0132	0.104231	0	0.0302276	0.0295818
Poland_Pol17_03029_C201_2016-2017	MG939587	AOO54502.1	hypothetical protein AFSV47Ss_0197	-0.0226954	0	0.0406402	0.0455227
Poland_Pol17_03029_C201_2016-2017	MG939587	AOO54531.1	hypothetical protein AFSV47Ss_0226	0.114185	0	0.0925194	0.089363
Poland_Pol17_03029_C201_2016-2017	MG939587	AXZ95928.1	ACD_01940	0.134464	0	0.0523733	0.05014
Poland_Pol17_03029_C201_2016-2017	MG939587	QED21726.1		-0.193674	0	0.0416152	0.043235
Poland_Pol17_04461_C210_2016-2017	MG939588	AXZ96078.1	MGF_360-9L	0.404801	0.289639	0.0804886	0.0648827
Poland_Pol17_04461_C210_2016-2017	MG939588	AXZ96089.1	MGF_505-5R	0.0198449	0	0.118781	0.119494
Poland_Pol17_04461_C210_2016-2017	MG939588	AXZ96090.1	MGF_505-6R	0.261357	0	0.14855	0.140356
Poland_Pol17_04461_C210_2016-2017	MG939588	AXZ96104.1	F778R	0.0176201	0.252822	0.0523092	0.0523371
Poland_Pol17_04461_C210_2016-2017	MG939588	AXZ96204.1	ACD_01870	0.0120858	0.201674	0.0631124	0.0622909
Poland_Pol17_04461_C210_2016-2017	MG939588	AXZ96209.1	DP71L	0.0921483	0.254591	0.0929244	0.09048
Poland_Pol17_04461_C210_2016-2017	MG939588	AXZ96211.1	ACD_01940	-0.143475	0.677197	0.0508174	0.0477009
Poland_Pol17_04461_C210_2016-2017	MG939588	CAN10247.1		-0.151912	0.344681	0.06535	0.0682658
Poland_Pol17_04461_C210_2016-2017	MG939588	CBW46699.1	ASFV_G_ACD_00600	0.220759	0.009094	0.051294	0.0490133
Poland_Pol17_04461_C210_2016-2017	MG939588	AJL34224.1		0.224626	0.185178	0.0560782	0.0523371
Poland_Pol17_04461_C210_2016-2017	MG939588	AOO54368.1	hypothetical protein AFSV47Ss_0063	-0.104955	0	0.0597865	0.0652074
Poland_Pol17_04461_C210_2016-2017	MG939588	AOO54369.1	hypothetical protein AFSV47Ss_0064	-0.205465	0	0.0597865	0.0652074
Poland_Pol17_04461_C210_2016-2017	MG939588	AOO54376.1	hypothetical protein AFSV47Ss_0071	-0.186973	0.294128	0.0269863	0.0352706
Poland_Pol17_04461_C210_2016-2017	MG939588	AOO54437.1	hypothetical protein AFSV47Ss_0132	0.104231	0	0.0302276	0.0295818
Poland_Pol17_04461_C210_2016-2017	MG939588	AOO54474.1	hypothetical protein AFSV47Ss_0169	-0.140198	0	0.0360018	0.0375471
Poland_Pol17_04461_C210_2016-2017	MG939588	AOO54502.1	hypothetical protein AFSV47Ss_0197	-0.0684045	0	0.0426403	0.0466596
Poland_Pol17_04461_C210_2016-2017	MG939588	AOO54531.1	hypothetical protein AFSV47Ss_0226	0.0973754	0	0.0990361	0.0971823
Poland_Pol17_05838_C220_2016-2017	MG939589	CAN10247.1		-0.169515	0.223721	0.0609779	0.0639506
Poland_Pol17_05838_C220_2016-2017	MG939589	CAN10254.1		0.0875092	0	0.0906017	0.088246
Poland_Pol17_05838_C220_2016-2017	MG939589	CBW46699.1	ASFV_G_ACD_00600	0.248013	0	0.051294	0.0478734
Poland_Pol17_05838_C220_2016-2017	MG939589	CBW46704.1		-0.277589	0	0.0505453	0.0557504
Poland_Pol17_05838_C220_2016-2017	MG939589	AJL34224.1		0.24914	0.212484	0.0560782	0.0523371
Poland_Pol17_05838_C220_2016-2017	MG939589	AOO54437.1	hypothetical protein AFSV47Ss_0132	0.104231	0.120007	0.0302276	0.0284448
Poland_Pol17_05838_C220_2016-2017	MG939589	AOO54474.1	hypothetical protein AFSV47Ss_0169	-0.140198	0.283063	0.0360018	0.0375471
Poland_Pol17_05838_C220_2016-2017	MG939589	AOO54487.1	hypothetical protein AFSV47Ss_0182	-0.278859	0	0.0435532	0.047786
Poland_Pol17_05838_C220_2016-2017	MG939589	AOO54492.1	hypothetical protein AFSV47Ss_0187	-0.211004	7e-06	0.0507401	0.052363
Poland_Pol17_05838_C220_2016-2017	MG939589	AOO54502.1	hypothetical protein AFSV47Ss_0197	-0.0684045	0	0.0412734	0.0466596
Poland_Pol17_05838_C220_2016-2017	MG939589	AOO54531.1	hypothetical protein AFSV47Ss_0226	0.0961336	0	0.0997999	0.0971823
Poland_Pol17_05838_C220_2016-2017	MG939589	SPS73439.1		0.414134	0.377601	0.0804886	0.0649901
Poland_Pol17_05838_C220_2016-2017	MG939589	QED21688.1		-0.236586	0	0.0276295	0.0295818
Poland_Pol17_05838_C220_2016-2017	MG939589	QGM12695.1		0.0332894	0	0.120763	0.119663
Poland_Pol17_05838_C220_2016-2017	MG939589	QGM12696.1		0.239999	0	0.149993	0.138807
Poland_Pol17_05838_C220_2016-2017	MG939589	QGM12818.1		0.140409	0	0.149993	0.138807
Uganda_R8_2015	MH025916	AXB49226.1	p110-1L	0.120182	1.59886	0.170361	0.171419
Uganda_R8_2015	MH025916	AXB49227.1	p110-2L	0.909471	2.04053	0.206865	0.157909
Uganda_R8_2015	MH025916	AXB49228.1	p110-3L	0.510012	0.278913	0.228181	0.200959
Uganda_R8_2015	MH025916	AXB49248.1	p360-7L	0.642485	0.780742	0.0840013	0.0650885
Uganda_R8_2015	MH025916	AXB49257.1	p505-4R	0.0413648	0	0.11975	0.121063
Uganda_R8_2015	MH025916	AXB49258.1	p505-5R	0.254893	0	0.148679	0.137697
Uganda_R8_2015	MH025916	AXB49274.1	pF778R	0.0176201	0.183013	0.0526861	0.0523371
Uganda_R8_2015	MH025916	AXB49382.1	p110-15R	0.538556	0.746223	0.202204	0.179414
Uganda_R8_2015	MH025916	CBW46691.1	ASFV_G_ACD_00520	0.0257745	0	0.152583	0.151582
Uganda_R8_2015	MH025916	AOO54437.1	hypothetical protein AFSV47Ss_0132	0.175625	0.409942	0.0302729	0.0261692
Uganda_R8_2015	MH025916	AOO54474.1	hypothetical protein AFSV47Ss_0169	-0.140433	0	0.036635	0.0375471
Uganda_R8_2015	MH025916	QGM12669.1		0.814124	0.731622	0.207301	0.192064
Uganda_R8_2015	MH025916	QGM12793.1		0.261542	0.731622	0.192832	0.183452
Uganda_R7_2015	MH025917	AXB49399.1	p110-1L	0.120182	1.37579	0.170361	0.171419
Uganda_R7_2015	MH025917	AXB49400.1	p110-2L	0.909471	1.45471	0.206865	0.157909
Uganda_R7_2015	MH025917	AXB49401.1	p110-3L	0.510012	0.61959	0.228181	0.200959
Uganda_R7_2015	MH025917	AXB49422.1	p360-7L	0.484459	0.71998	0.0840013	0.0650885
Uganda_R7_2015	MH025917	AXB49431.1	p505-4R	0.047621	0	0.119473	0.119023
Uganda_R7_2015	MH025917	AXB49432.1	p505-5R	0.239999	0	0.149227	0.138801
Uganda_R7_2015	MH025917	AXB49448.1	pF778R	0.0072967	0.149961	0.0523594	0.0523371
Uganda_R7_2015	MH025917	AXB49556.1	p110-15R	0.537458	0.257053	0.2008	0.17976
Uganda_R7_2015	MH025917	CBW46691.1	ASFV_G_ACD_00520	-0.0031601	0	0.152106	0.152229
Uganda_R7_2015	MH025917	AOO54437.1	hypothetical protein AFSV47Ss_0132	0.179932	0.361977	0.0302729	0.0261692
Uganda_R7_2015	MH025917	AOO54474.1	hypothetical protein AFSV47Ss_0169	-0.174662	0.156719	0.036635	0.0375471
Uganda_R7_2015	MH025917	QGM12669.1		0.814124	1.33112	0.207301	0.192064
Uganda_R7_2015	MH025917	QGM12793.1		0.261542	1.45471	0.192832	0.183452
Uganda_R25_2015	MH025918	AXB49573.1	p110-1L	0.120182	1.77159	0.170361	0.171419
Uganda_R25_2015	MH025918	AXB49574.1	p110-2L	0.909471	2.02614	0.206865	0.157909
Uganda_R25_2015	MH025918	AXB49575.1	p110-3L	0.510012	0.398416	0.228181	0.200959
Uganda_R25_2015	MH025918	AXB49594.1	p360-7L	0.484651	0.783445	0.0840013	0.0661676
Uganda_R25_2015	MH025918	AXB49603.1	p505-4R	0.0465318	0.086602	0.118987	0.1179
Uganda_R25_2015	MH025918	AXB49604.1	p505-5R	0.239999	0	0.144676	0.136958
Uganda_R25_2015	MH025918	AXB49620.1	pF778R	0.0072967	0.154656	0.0529373	0.0523371
Uganda_R25_2015	MH025918	AXB49722.1	p100-3L	-0.176786	0.086069	0.0631292	0.0689791
Uganda_R25_2015	MH025918	AXB49728.1	p110-15R	0.544362	1.06109	0.204482	0.180488
Uganda_R25_2015	MH025918	CBW46691.1	ASFV_G_ACD_00520	-0.0183488	0	0.152106	0.152823
Uganda_R25_2015	MH025918	AOO54437.1	hypothetical protein AFSV47Ss_0132	0.179932	0.228903	0.0302729	0.027307
Uganda_R25_2015	MH025918	QGM12669.1		0.814124	0.817916	0.207301	0.192064
Uganda_R25_2015	MH025918	QGM12793.1		0.261542	1.74941	0.192832	0.183452
Uganda_N10_2015	MH025919	AXB49745.1	p110-1L	0.120182	1.3358	0.170361	0.168657
Uganda_N10_2015	MH025919	AXB49746.1	p110-2L	0.909471	1.07305	0.206865	0.157909
Uganda_N10_2015	MH025919	AXB49747.1	p110-3L	0.510012	0.523929	0.228181	0.200959
Uganda_N10_2015	MH025919	AXB49767.1	p360-7L	0.857363	0.329352	0.0812882	0.0642323
Uganda_N10_2015	MH025919	AXB49775.1	p505-5R	0.218841	0	0.150666	0.137828
Uganda_N10_2015	MH025919	AXB49791.1	pF778R	0.0992332	0.317467	0.0532389	0.0523371
Uganda_N10_2015	MH025919	AXB49899.1	p110-15R	0.263671	1.22974	0.194162	0.201056
Uganda_N10_2015	MH025919	AXB49901.1	pDP71L	0.0024735	1.59889	0.172551	0.18904
Uganda_N10_2015	MH025919	AOO54437.1	hypothetical protein AFSV47Ss_0132	0.164386	0.283914	0.0302276	0.0284448
Uganda_N10_2015	MH025919	AOO54474.1	hypothetical protein AFSV47Ss_0169	-0.140198	0	0.0360018	0.0409605
Uganda_N10_2015	MH025919	QED21726.1		-0.191795	0.105065	0.0416152	0.043235
Uganda_N10_2015	MH025919	QGM12669.1		0.814124	1.07305	0.207301	0.192064
Uganda_N10_2015	MH025919	QGM12793.1		0.261542	1.29874	0.192832	0.183452
Uganda_R35_2015	MH025920	AXB49916.1	p110-1L	0.120182	1.47531	0.170361	0.171419
Uganda_R35_2015	MH025920	AXB49917.1	p110-2L	0.909471	1.31615	0.206865	0.157909
Uganda_R35_2015	MH025920	AXB49918.1	p110-3L	0.510012	0.268311	0.228181	0.200959
Uganda_R35_2015	MH025920	AXB49938.1	p360-7L	0.484555	0.939522	0.0840013	0.0661556
Uganda_R35_2015	MH025920	AXB49947.1	p505-4R	0.0463193	0	0.120592	0.119023
Uganda_R35_2015	MH025920	AXB49948.1	p505-5R	0.239999	0	0.149841	0.138801
Uganda_R35_2015	MH025920	AXB50066.1	p100-3L	-0.176786	0.013551	0.0647414	0.0694507
Uganda_R35_2015	MH025920	AXB50072.1	p110-15R	0.539627	1.47107	0.204009	0.180112
Uganda_R35_2015	MH025920	CBW46691.1	ASFV_G_ACD_00520	-0.0107445	0	0.152106	0.152525
Uganda_R35_2015	MH025920	AOO54437.1	hypothetical protein AFSV47Ss_0132	0.179932	0.58004	0.0302729	0.0261692
Uganda_R35_2015	MH025920	AOO54502.1	hypothetical protein AFSV47Ss_0197	-0.0680599	0	0.0424192	0.0455215
Uganda_R35_2015	MH025920	QGM12669.1		0.814124	1.26882	0.207301	0.192064
Uganda_R35_2015	MH025920	QGM12793.1		0.261542	1.31915	0.192832	0.183452
Poland_ASFV_POL_Podlaskie_2015	MH681419	CAN10170.1		-0.222068	0	0.0417056	0.0443727
Poland_ASFV_POL_Podlaskie_2015	MH681419	CAN10247.1		-0.173507	0	0.0614805	0.0648525
Poland_ASFV_POL_Podlaskie_2015	MH681419	CAN10254.1		0.0874309	0.033693	0.0906017	0.088246
Poland_ASFV_POL_Podlaskie_2015	MH681419	CBW46699.1	ASFV_G_ACD_00600	0.196153	0	0.0490929	0.0467336
Poland_ASFV_POL_Podlaskie_2015	MH681419	CBW46704.1		-0.277589	0	0.0503141	0.0557504
Poland_ASFV_POL_Podlaskie_2015	MH681419	AJL34224.1		0.205999	0.283394	0.0564903	0.0523371
Poland_ASFV_POL_Podlaskie_2015	MH681419	AOO54369.1	hypothetical protein AFSV47Ss_0064	-0.273224	0	0.0426631	0.0407087
Poland_ASFV_POL_Podlaskie_2015	MH681419	AOO54376.1	hypothetical protein AFSV47Ss_0071	-0.214439	0.229614	0.0306749	0.0375462
Poland_ASFV_POL_Podlaskie_2015	MH681419	AOO54437.1	hypothetical protein AFSV47Ss_0132	0.0704017	0	0.0290467	0.0284441
Poland_ASFV_POL_Podlaskie_2015	MH681419	AOO54474.1	hypothetical protein AFSV47Ss_0169	-0.140198	0	0.0360018	0.0375471
Poland_ASFV_POL_Podlaskie_2015	MH681419	AOO54487.1	hypothetical protein AFSV47Ss_0182	-0.278859	0	0.0435532	0.047348
Poland_ASFV_POL_Podlaskie_2015	MH681419	AOO54531.1	hypothetical protein AFSV47Ss_0226	0.0973227	0.033693	0.0997999	0.0971823
Poland_ASFV_POL_Podlaskie_2015	MH681419	SPS73439.1		0.454025	0.376451	0.0804886	0.0661783
Poland_ASFV_POL_Podlaskie_2015	MH681419	QED21688.1		-0.260802	0.090791	0.0286145	0.0307196
Poland_ASFV_POL_Podlaskie_2015	MH681419	QGM12695.1		0.0186522	0	0.119453	0.118523
Poland_ASFV_POL_Podlaskie_2015	MH681419	QGM12696.1		0.252117	0	0.147023	0.138871
China_ASFV-SY18_2018	MH766894	AXZ95838.1	C84L	-0.18627	0	0.0234239	0.0247985
China_ASFV-SY18_2018	MH766894	AXZ95928.1	ACD_01940	-0.145101	0.284204	0.0594675	0.0618608
China_ASFV-SY18_2018	MH766894	SPS73571.1	MGF 100-3L CDS	0.58658	0	0.0682295	0.0542348
China_ASFV-SY18_2018	MH766894	AOO54330.1	hypothetical protein AFSV47Ss_0025	0.0983886	0.120216	0.0430564	0.0461801
China_ASFV-SY18_2018	MH766894	AOO54352.1	hypothetical protein AFSV47Ss_0047	0.0420734	0.235196	0.0751735	0.0841589
China_ASFV-SY18_2018	MH766894	AOO54357.1	hypothetical protein AFSV47Ss_0052	0.265526	0	0.0466161	0.0461816
China_ASFV-SY18_2018	MH766894	AOO54367.1	hypothetical protein AFSV47Ss_0062	0.147012	0	0.070751	0.069618
China_ASFV-SY18_2018	MH766894	AOO54368.1	hypothetical protein AFSV47Ss_0063	0.260844	0	0.0618528	0.0541451
China_ASFV-SY18_2018	MH766894	AOO54369.1	hypothetical protein AFSV47Ss_0064	0.260844	0	0.0618528	0.0541451
China_ASFV-SY18_2018	MH766894	AOO54376.1	hypothetical protein AFSV47Ss_0071	0.234332	0	0.0172325	0.0177622
China_ASFV-SY18_2018	MH766894	AOO54398.1	hypothetical protein AFSV47Ss_0093	0.115674	0	0.0164469	0.0177616
China_ASFV-SY18_2018	MH766894	AOO54404.1	hypothetical protein AFSV47Ss_0099	0.149213	0	0.0344985	0.0320032
China_ASFV-SY18_2018	MH766894	AOO54405.1	hypothetical protein AFSV47Ss_0100	0.276071	0	0.0405512	0.0367073
China_ASFV-SY18_2018	MH766894	AOO54413.1	hypothetical protein AFSV47Ss_0108	-0.242797	0	0.0269846	0.0284185
China_ASFV-SY18_2018	MH766894	AOO54431.1	hypothetical protein AFSV47Ss_0126	0.0022219	0	0.0246633	0.0248662
China_ASFV-SY18_2018	MH766894	AOO54432.1	hypothetical protein AFSV47Ss_0127	0.107336	0	0.0210611	0.0189457
China_ASFV-SY18_2018	MH766894	AOO54437.1	hypothetical protein AFSV47Ss_0132	1.01729	0	0.028315	0.0213139
China_ASFV-SY18_2018	MH766894	AOO54440.1	hypothetical protein AFSV47Ss_0135	0.301555	0	0.0286406	0.0272344
China_ASFV-SY18_2018	MH766894	AOO54443.1	hypothetical protein AFSV47Ss_0138	0.216992	0	0.020495	0.0189457
China_ASFV-SY18_2018	MH766894	AOO54450.1	hypothetical protein AFSV47Ss_0145	0.490132	0.386245	0.028499	0.0236821
China_ASFV-SY18_2018	MH766894	AOO54451.1	hypothetical protein AFSV47Ss_0146	-0.228396	0	0.0208488	0.0213139
China_ASFV-SY18_2018	MH766894	AOO54454.1	hypothetical protein AFSV47Ss_0149	0.190494	0	0.0213017	0.0201298
China_ASFV-SY18_2018	MH766894	AOO54456.1	hypothetical protein AFSV47Ss_0151	0.417566	4e-06	0.0279612	0.0248662
China_ASFV-SY18_2018	MH766894	AOO54465.1	hypothetical protein AFSV47Ss_0160	0.122916	5e-06	0.0257329	0.0260512
China_ASFV-SY18_2018	MH766894	AOO54466.1	hypothetical protein AFSV47Ss_0161	0.115497	0	0.0329704	0.0319016
China_ASFV-SY18_2018	MH766894	AOO54474.1	hypothetical protein AFSV47Ss_0169	0.634992	0	0.0348754	0.0296027
China_ASFV-SY18_2018	MH766894	AOO54476.1	hypothetical protein AFSV47Ss_0171	0.0734338	0.111754	0.0234036	0.0236821
China_ASFV-SY18_2018	MH766894	AOO54478.1	hypothetical protein AFSV47Ss_0173	-0.0786067	0.631553	0.0173599	0.0260503
China_ASFV-SY18_2018	MH766894	AOO54487.1	hypothetical protein AFSV47Ss_0182	0.398565	0	0.0393198	0.0355232
China_ASFV-SY18_2018	MH766894	AOO54492.1	hypothetical protein AFSV47Ss_0187	0.574165	0	0.0528934	0.0438119
China_ASFV-SY18_2018	MH766894	AOO54502.1	hypothetical protein AFSV47Ss_0197	0.493853	0	0.0394361	0.0330935
China_ASFV-SY18_2018	MH766894	AOO54512.1	hypothetical protein AFSV47Ss_0207	-0.119392	0	0.0322755	0.032963
China_ASFV-SY18_2018	MH766894	AOO54517.1	hypothetical protein AFSV47Ss_0212	0.176415	0	0.0466444	0.0449975
China_ASFV-SY18_2018	MH766894	AOO54518.1	hypothetical protein AFSV47Ss_0213	0.176415	0	0.0392985	0.0378914
China_ASFV-SY18_2018	MH766894	AOO54531.1	hypothetical protein AFSV47Ss_0226	0.404799	0	0.102947	0.0906106
China_ASFV-SY18_2018	MH766894	AOO54532.1	hypothetical protein AFSV47Ss_0227	0.501627	0	0.105724	0.092934
China_ASFV-SY18_2018	MH766894	AJL34242.1	BA71V-C84L	-0.18627	0	0.027041	0.0271196
China_ASFV-SY18_2018	MH766894	CBW46699.1	ASFV_G_ACD_00600	0.324265	0	0.0614283	0.0568389
China_ASFV-SY18_2018	MH766894	CBW46723.1	EP153R	-0.231938	0.724355	0.128659	0.136696
China_ASFV-SY18_2018	MH766894	CBW46729.1	C84L	-0.18627	0	0.0234239	0.0247985
China_ASFV-SY18_2018	MH766894	CBW46738.1	ASFV_G_ACD_01020	0.0701557	0	0.0253276	0.0248099
China_ASFV-SY18_2018	MH766894	CBW46757.1	CP123L	0.231239	0.00193	0.0299597	0.0272344
China_ASFV-SY18_2018	MH766894	CBW46801.1	E66L	0.0763637	0	0.0842303	0.0788034
China_ASFV-SY18_2018	MH766894	CBW46809.1	ASFV_G_ACD_01760	-0.0383562	1.63161	0.0398035	0.0402427
China_ASFV-SY18_2018	MH766894	CBW46818.1	ASFV_G_ACD_01870	0.153808	0	0.0681199	0.0635545
China_ASFV-SY18_2018	MH766894	CBW46825.1	ASFV_G_ACD_01940	-0.139963	0.157884	0.111237	0.117603
China_ASFV-SY18_2018	MH766894	CBH29133.1	MGF 505-10R	0.644631	0	0.0482014	0.0403076
China_ASFV-SY18_2018	MH766894	CBH29173.1	BA71V-C962R	0.401201	0.318785	0.0250809	0.022498
China_ASFV-SY18_2018	MH766894	CBH29185.1	BA71V-B117L	-0.107892	0.663575	0.077503	0.0764463
China_ASFV-SY18_2018	MH766894	CBH29246.1	BA71V- DP63R	0.151799	0.760567	0.0519862	0.0437569
China_ASFV-SY18_2018	MH766894	CAN10374.1	MGF 505-3R	0.10849	0.404879	0.0815977	0.0757828
China_ASFV-SY18_2018	MH766894	CAN10503.1	MGF 360-17R	0.504747	0.021355	0.0734568	0.06249
China_ASFV-SY18_2018	MH766894	CAN10504.1	MGF 360-18R	0.472384	0.112652	0.0942938	0.0805192
China_ASFV-SY18_2018	MH766894	CAN10114.1	MGF 300-3L	0.0050006	4e-06	0.0475344	0.0485484
China_ASFV-SY18_2018	MH766894	AKO62688.1	L60L	-0.215279	13.0222	0.0841389	0.0934096
China_ASFV-SY18_2018	MH766894	AKO62697.1	pBA71-J154R	0.217994	0.724355	0.0408379	0.0378052
China_ASFV-SY18_2018	MH766894	AKO62700.1	MGF_360-9L	1.06063	0.503495	0.079786	0.0627576
China_ASFV-SY18_2018	MH766894	AKO62710.1	MGF_505-5R	0.741513	0	0.128955	0.104303
China_ASFV-SY18_2018	MH766894	AKO62711.1	MGF_505-6R	0.944256	0	0.157248	0.124331
China_ASFV-SY18_2018	MH766894	AKO62712.1	MGF_505-7R	0.225516	0	0.0705788	0.0674941
China_ASFV-SY18_2018	MH766894	AKO62713.1	MGF_505-9R	0.455572	0	0.0572812	0.0521007
China_ASFV-SY18_2018	MH766894	AKO62714.1	MGF_505-10R	0.451098	0	0.0446133	0.0402596
China_ASFV-SY18_2018	MH766894	AKO62715.1	A224L	0.603376	0	0.0337077	0.0272965
China_ASFV-SY18_2018	MH766894	AKO62716.1	A104R	0.418762	0	0.0338776	0.0272344
China_ASFV-SY18_2018	MH766894	AKO62717.1	A240L	0.339062	0	0.0778186	0.0710464
China_ASFV-SY18_2018	MH766894	AKO62719.1	A151R	0.335814	5e-06	0.0709468	0.0639417
China_ASFV-SY18_2018	MH766894	AKO62720.1	MGF_360-15R	0.300941	0	0.0511454	0.044996
China_ASFV-SY18_2018	MH766894	AKO62721.1	A238L	0.853047	0	0.070751	0.0615735
China_ASFV-SY18_2018	MH766894	AKO62722.1	A859L	0.451246	0	0.0262769	0.0248662
China_ASFV-SY18_2018	MH766894	AKO62723.1	A179L	0.102488	0	0.0211885	0.0213139
China_ASFV-SY18_2018	MH766894	AKO62725.1	F317L	0.190463	3e-06	0.0319172	0.0284185
China_ASFV-SY18_2018	MH766894	AKO62726.1	F334L	0.109029	0.229473	0.0227242	0.0248662
China_ASFV-SY18_2018	MH766894	AKO62727.1	F778R	0.72428	0.192264	0.0496805	0.0426278
China_ASFV-SY18_2018	MH766894	AKO62728.1	F165R	0.258258	0	0.0273313	0.0236821
China_ASFV-SY18_2018	MH766894	AKO62729.1	F1055L	0.310627	0.085051	0.0340899	0.0319709
China_ASFV-SY18_2018	MH766894	AKO62732.1	K196R	0.0073362	0	0.0292382	0.0307868
China_ASFV-SY18_2018	MH766894	AKO62733.1	K145R	0.246446	0	0.025187	0.0213139
China_ASFV-SY18_2018	MH766894	AKO62736.1	EP84R	-0.233569	0.803422	0.0414026	0.0426616
China_ASFV-SY18_2018	MH766894	AKO62737.1	EP424R	0.556255	0.210885	0.0346348	0.0284185
China_ASFV-SY18_2018	MH766894	AKO62738.1	EP152R	0.318528	0	0.0395108	0.0355232
China_ASFV-SY18_2018	MH766894	AKO62743.1	M448R	0.0904225	0.277776	0.0392816	0.0367073
China_ASFV-SY18_2018	MH766894	AKO62746.1	C717R	0.0406542	0	0.0213088	0.0213139
China_ASFV-SY18_2018	MH766894	AKO62747.1	C122R	0.115674	0	0.0164469	0.0177616
China_ASFV-SY18_2018	MH766894	AKO62752.1	C62L	0.179882	0	0.038605	0.0343391
China_ASFV-SY18_2018	MH766894	AKO62753.1	C962R	0.362027	0.212631	0.0253569	0.024867
China_ASFV-SY18_2018	MH766894	AKO62756.1	B318L	0.468877	0	0.0283221	0.0272344
China_ASFV-SY18_2018	MH766894	AKO62758.1	B169L	0.0053552	0	0.0210328	0.0213139
China_ASFV-SY18_2018	MH766894	AKO62759.1	B475L	0.152554	0	0.0283787	0.0284185
China_ASFV-SY18_2018	MH766894	AKO62763.1	B646L	0.0563054	0	0.0228799	0.022498
China_ASFV-SY18_2018	MH766894	AKO62764.1	B125R	0.147832	0	0.0226251	0.0213139
China_ASFV-SY18_2018	MH766894	AKO62765.1	B117L	-0.15483	0.104916	0.0528789	0.0552179
China_ASFV-SY18_2018	MH766894	AKO62766.1	B407L	0.171081	0.057066	0.0305797	0.0271471
China_ASFV-SY18_2018	MH766894	AKO62767.1	B175L	0.137674	0	0.0307778	0.030688
China_ASFV-SY18_2018	MH766894	AKO62768.1	B263R	0.277847	0	0.0247482	0.0236821
China_ASFV-SY18_2018	MH766894	AKO62769.1	B66L	0.241369	0	0.0190088	0.0177622
China_ASFV-SY18_2018	MH766894	AKO62771.1	G1211R	0.233579	0.137284	0.0295535	0.0272344
China_ASFV-SY18_2018	MH766894	AKO62773.1	CP2475L	0.675049	0.186221	0.0415278	0.0367073
China_ASFV-SY18_2018	MH766894	AKO62775.1	CP530R	0.419859	0	0.0291643	0.0274087
China_ASFV-SY18_2018	MH766894	AKO62778.1	O174L	0.0574179	0	0.0325046	0.0307931
China_ASFV-SY18_2018	MH766894	AKO62781.1	NP419L	0.0840635	0	0.0314289	0.0319709
China_ASFV-SY18_2018	MH766894	AKO62783.1	D205R	0.312167	0	0.0275615	0.0236821
China_ASFV-SY18_2018	MH766894	AKO62786.1	D339L	0.0989326	0	0.0290275	0.0272422
China_ASFV-SY18_2018	MH766894	AKO62788.1	D117L	0.32818	0.624172	0.0344488	0.0352287
China_ASFV-SY18_2018	MH766894	AKO62789.1	D205R	0.120808	0	0.0299994	0.0272344
China_ASFV-SY18_2018	MH766894	AKO62792.1	S273R	0.23109	0	0.0253781	0.0236821
China_ASFV-SY18_2018	MH766894	AKO62793.1	P1192R	0.229048	0	0.0301338	0.0272344
China_ASFV-SY18_2018	MH766894	AKO62794.1	H359L	0.084836	0	0.0319172	0.0296027
China_ASFV-SY18_2018	MH766894	AKO62798.1	H108R	0.795121	0	0.0372472	0.0288994
China_ASFV-SY18_2018	MH766894	AKO62799.1	H233R	0.149216	4e-06	0.0379751	0.0343391
China_ASFV-SY18_2018	MH766894	AKO62801.1	R298L	0.370893	0.041573	0.0299357	0.0272344
China_ASFV-SY18_2018	MH766894	AKO62804.1	QP383R	0.35377	0	0.048718	0.0378914
China_ASFV-SY18_2018	MH766894	AKO62809.1	E146L	0.185091	0.099553	0.0386687	0.0402596
China_ASFV-SY18_2018	MH766894	AKO62812.1	E248R	0.0199724	0	0.0209691	0.022498
China_ASFV-SY18_2018	MH766894	AKO62813.1	E120R	0.0253491	0	0.0437826	0.0393057
China_ASFV-SY18_2018	MH766894	AKO62815.1	E111R	0.354972	0	0.03346	0.0319719
China_ASFV-SY18_2018	MH766894	AKO62816.1	pE66L	0.0699911	0	0.0779408	0.0763965
China_ASFV-SY18_2018	MH766894	AKO62817.1	I267L	0.0699911	0	0.0406496	0.0390879
China_ASFV-SY18_2018	MH766894	AKO62818.1	I226R	0.199689	0	0.02978	0.0296027
China_ASFV-SY18_2018	MH766894	AKO62819.1	I243L	0.509149	0	0.0261424	0.022498
China_ASFV-SY18_2018	MH766894	AKO62820.1	I73R	0.0061826	0	0.0565085	0.0512935
China_ASFV-SY18_2018	MH766894	AKO62822.1	I215L	0.0361987	0.012955	0.054047	0.0533971
China_ASFV-SY18_2018	MH766894	AKO62823.1	pI177L	0.0521435	0.476875	0.0678683	0.0670212
China_ASFV-SY18_2018	MH766894	AKO62824.1	I196L	0.0567137	0	0.0451942	0.04324
China_ASFV-SY18_2018	MH766894	AKO62825.1	DP238L	0.335037	0	0.0604438	0.0586302
China_ASFV-SY18_2018	MH766894	AKO62826.1	MGF_360-16R	0.272759	0	0.0444647	0.0411921
China_ASFV-SY18_2018	MH766894	AKO62827.1	MGF_505-11L	0.0337115	0	0.0459651	0.0438119
China_ASFV-SY18_2018	MH766894	AKO62830.1	I7L	0.168515	0	0.0384344	0.0367085
China_ASFV-SY18_2018	MH766894	AKO62832.1	I9R	0.125695	0	0.059257	0.057815
China_ASFV-SY18_2018	MH766894	AKO62835.1	MGF_360-18R	0.436807	0.112652	0.0823266	0.078151
China_ASFV-SY18_2018	MH766894	AKO62836.1	DP71L	0.372604	0	0.102947	0.0906106
China_ASFV-SY18_2018	MH766894	CBW46655.1	MGF_110-4L	0.0057508	17.1179	0.175791	0.179385
China_ASFV-SY18_2018	MH766894	AOO54533.1	pDP71L	0	0	0	0
China_AnhuiXCGQ_2018	MK128995	AYW33988.1	MGF_360-9L	0.811428	0.502273	0.0833269	0.0648525
China_AnhuiXCGQ_2018	MK128995	AYW33999.1	MGF_505-5R	0.0227245	0	0.120669	0.118523
China_AnhuiXCGQ_2018	MK128995	AYW34000.1	MGF_505-6R	0.306988	0	0.148785	0.139242
China_AnhuiXCGQ_2018	MK128995	AYW34005.1	ASFV_G_ACD_00600	0.202157	0	0.0539675	0.0524193
China_AnhuiXCGQ_2018	MK128995	AYW34017.1	F778R	0.0992332	0.393112	0.0532389	0.0523371
China_AnhuiXCGQ_2018	MK128995	AYW34121.1	ASFV_G_ACD_01870	-0.0652722	0	0.0638641	0.0677496
China_AnhuiXCGQ_2018	MK128995	AYW34126.1	DP71L	0.0933254	0	0.0921827	0.089363
China_AnhuiXCGQ_2018	MK128995	CAN10247.1		-0.21779	0	0.0608372	0.0637147
China_AnhuiXCGQ_2018	MK128995	AJL34224.1		0.21122	0.285587	0.0561636	0.0523371
China_AnhuiXCGQ_2018	MK128995	AOO54368.1	hypothetical protein AFSV47Ss_0063	-0.135118	2e-06	0.0607359	0.0620193
China_AnhuiXCGQ_2018	MK128995	AOO54369.1	hypothetical protein AFSV47Ss_0064	-0.135118	2e-06	0.0607359	0.0620193
China_AnhuiXCGQ_2018	MK128995	AOO54376.1	hypothetical protein AFSV47Ss_0071	-0.207801	0.393112	0.0253581	0.0352716
China_AnhuiXCGQ_2018	MK128995	AOO54437.1	hypothetical protein AFSV47Ss_0132	0.164386	0	0.0298608	0.0284441
China_AnhuiXCGQ_2018	MK128995	AOO54474.1	hypothetical protein AFSV47Ss_0169	-0.104575	0	0.0367858	0.0420983
China_AnhuiXCGQ_2018	MK128995	AOO54487.1	hypothetical protein AFSV47Ss_0182	-0.226499	0.111553	0.0450683	0.0496027
China_AnhuiXCGQ_2018	MK128995	AOO54531.1	hypothetical protein AFSV47Ss_0226	0.111302	0	0.0997999	0.0971823
China_AnhuiXCGQ_2018	MK128995	AXZ95928.1	ACD_01940	0.179475	0.024484	0.0746766	0.0711761
China_HLJ_2018	MK333180	QBH90504.1	NA	0.749071	0.770013	0.0823717	0.0661817
China_HLJ_2018	MK333180	QBH90515.1	NA	0.0186522	0	0.1195	0.119494
China_HLJ_2018	MK333180	QBH90516.1	NA	0.242913	0	0.149589	0.138128
China_HLJ_2018	MK333180	QBH90521.1	NA	0.217458	0.267616	0.0496658	0.0467336
China_HLJ_2018	MK333180	QBH90524.1	NA	-0.0980038	0	0.080799	0.0941058
China_HLJ_2018	MK333180	QBH90533.1	NA	0.0072967	0.09706	0.0523594	0.0523371
China_HLJ_2018	MK333180	QBH90644.1	NA	0.0959523	0	0.0941883	0.0915971
China_HLJ_2018	MK333180	QBH90646.1	NA	-0.162469	0.460834	0.121342	0.128809
China_HLJ_2018	MK333180	CAN10247.1		-0.151912	0.119401	0.0657018	0.0694035
China_HLJ_2018	MK333180	AJL34224.1		0.184328	0.123556	0.0562993	0.0523371
China_HLJ_2018	MK333180	AOO54437.1	AOO54437.1	0.0704017	0.541684	0.0290467	0.0284441
China_HLJ_2018	MK333180	AOO54443.1	AOO54443.1	-0.165952	0	0.0194181	0.0273063
China_HLJ_2018	MK333180	AOO54474.1	AOO54474.1	-0.105526	0	0.0374893	0.0386849
China_HLJ_2018	MK333180	AOO54502.1	AOO54502.1	-0.0359845	0	0.0412734	0.0466596
China_HLJ_2018	MK333180	AOO54531.1	AOO54531.1	0.102009	0	0.0982189	0.0960652
China_HLJ_2018	MK333180	AXZ95928.1	AXZ95928.1	0.0833745	0.278111	0.052512	0.0513199
China_HLJ_2018	MK333180	QED21688.1		-0.174646	0	0.0269863	0.0307196
China_LN_2018	MK333181	QBH90689.1	NA	0.749071	0.770013	0.0823717	0.0661817
China_LN_2018	MK333181	QBH90700.1	NA	0.0186522	0	0.1195	0.119494
China_LN_2018	MK333181	QBH90701.1	NA	0.242913	0	0.149589	0.138128
China_LN_2018	MK333181	QBH90706.1	NA	0.217458	0.267616	0.0496658	0.0467336
China_LN_2018	MK333181	QBH90709.1	NA	-0.0980038	0	0.080799	0.0941058
China_LN_2018	MK333181	QBH90718.1	NA	0.0072967	0.09706	0.0523594	0.0523371
China_LN_2018	MK333181	QBH90829.1	NA	0.0959523	0	0.0941883	0.0915971
China_LN_2018	MK333181	QBH90831.1	NA	-0.162469	0.460834	0.121342	0.128809
China_LN_2018	MK333181	CAN10247.1		-0.151912	0.119401	0.0657018	0.0694035
China_LN_2018	MK333181	AJL34224.1		0.184328	0.123556	0.0562993	0.0523371
China_LN_2018	MK333181	AOO54437.1	AOO54437.1	0.0704017	0.541684	0.0290467	0.0284441
China_LN_2018	MK333181	AOO54443.1	AOO54443.1	-0.165952	0	0.0194181	0.0273063
China_LN_2018	MK333181	AOO54474.1	AOO54474.1	-0.105526	0	0.0374893	0.0386849
China_LN_2018	MK333181	AOO54502.1	AOO54502.1	-0.0359845	0	0.0412734	0.0466596
China_LN_2018	MK333181	AOO54531.1	AOO54531.1	0.102009	0	0.0982189	0.0960652
China_LN_2018	MK333181	AXZ95928.1	AXZ95928.1	0.0833745	0.278111	0.052512	0.0513199
China_LN_2018	MK333181	QED21688.1		-0.174646	0	0.0269863	0.0307196
Belgium_Etalle_wb_2018	MK543947	QED90459.1		0.790915	0.407282	0.0804967	0.0648827
Belgium_Etalle_wb_2018	MK543947	QED90470.1		0.0352916	0	0.121387	0.119665
Belgium_Etalle_wb_2018	MK543947	QED90471.1		0.259351	0	0.146859	0.139945
Belgium_Etalle_wb_2018	MK543947	QED90476.1		0.248013	0	0.051294	0.0490133
Belgium_Etalle_wb_2018	MK543947	QED90488.1		0.0694846	0.000915	0.0523092	0.0523371
Belgium_Etalle_wb_2018	MK543947	QED90591.1		-0.124715	0	0.0617016	0.067128
Belgium_Etalle_wb_2018	MK543947	QED90594.1		-0.126486	0	0.0632147	0.0671984
Belgium_Etalle_wb_2018	MK543947	QED90599.1		0.0747277	0	0.0912165	0.089363
Belgium_Etalle_wb_2018	MK543947	AJL34224.1		0.184328	0.054926	0.0562993	0.0523371
Belgium_Etalle_wb_2018	MK543947	AOO54368.1		-0.125382	0	0.0664537	0.0676044
Belgium_Etalle_wb_2018	MK543947	AOO54376.1		-0.186973	0	0.0253581	0.0352706
Belgium_Etalle_wb_2018	MK543947	AOO54437.1		0.164386	0.109316	0.0302276	0.0284448
Belgium_Etalle_wb_2018	MK543947	AOO54474.1		-0.141031	0	0.036635	0.0409605
Belgium_Etalle_wb_2018	MK543947	AOO54487.1		-0.0654017	0	0.0467042	0.0496027
Belgium_Etalle_wb_2018	MK543947	AOO54531.1		0.0826998	0	0.0997999	0.0971823
Belgium_Etalle_wb_2018	MK543947	AXZ95928.1		-0.167852	0	0.0539178	0.0500455
Belgium_Etalle_wb_2018	MK543947	QED21538.1		-0.194309	0.776366	0.126381	0.133253
Lithuania_LT14_2014	MK628478	QEY87822.1		0.791014	0.152045	0.0804967	0.0648827
Lithuania_LT14_2014	MK628478	QEY87833.1		0.0198449	0	0.118781	0.119494
Lithuania_LT14_2014	MK628478	QEY87834.1		0.261357	0	0.14855	0.140356
Lithuania_LT14_2014	MK628478	QEY87839.1		0.220759	0	0.051294	0.0490133
Lithuania_LT14_2014	MK628478	QEY87851.1		0.0176201	0.326746	0.0523092	0.0523371
Lithuania_LT14_2014	MK628478	QEY87954.1		-0.151912	0.111763	0.06535	0.0682658
Lithuania_LT14_2014	MK628478	QEY87961.1		0.0921483	0	0.0929244	0.09048
Lithuania_LT14_2014	MK628478	CBW46818.1		0.0120858	0.21933	0.0631124	0.0622909
Lithuania_LT14_2014	MK628478	AJL34224.1		0.224626	0.271885	0.0560782	0.0523371
Lithuania_LT14_2014	MK628478	AOO54368.1		-0.104955	0	0.0597865	0.0652074
Lithuania_LT14_2014	MK628478	AOO54369.1		-0.205465	0	0.0597865	0.0652074
Lithuania_LT14_2014	MK628478	AOO54376.1		-0.186973	0.567824	0.0269863	0.0352706
Lithuania_LT14_2014	MK628478	AOO54437.1		0.104231	0	0.0302276	0.0295818
Lithuania_LT14_2014	MK628478	AOO54474.1		-0.140198	0.065677	0.0360018	0.0375471
Lithuania_LT14_2014	MK628478	AOO54502.1		-0.0684045	0	0.0426403	0.0466596
Lithuania_LT14_2014	MK628478	AOO54531.1		0.0973754	0	0.0990361	0.0971823
Lithuania_LT14_2014	MK628478	AXZ95928.1		-0.143475	0	0.0508174	0.0477009
China_wbBS01_2018	MK645909	QDL88020.1		0	0.700453	0	0
China_wbBS01_2018	MK645909	QDL88047.1		0.749367	0.752781	0.0841872	0.0661199
China_wbBS01_2018	MK645909	QDL88058.1		0.0412856	0	0.118884	0.118523
China_wbBS01_2018	MK645909	QDL88059.1		0.249814	0	0.147023	0.139242
China_wbBS01_2018	MK645909	QDL88064.1		0.248013	0	0.051294	0.0478734
China_wbBS01_2018	MK645909	QDL88067.1		-0.113706	0.539677	0.0802373	0.0951541
China_wbBS01_2018	MK645909	QDL88076.1		0.0176201	0.335369	0.0526861	0.0523371
China_wbBS01_2018	MK645909	QDL88182.1		-0.0652722	0	0.0638641	0.0677496
China_wbBS01_2018	MK645909	QDL88187.1		0.0933254	0	0.0921827	0.089363
China_wbBS01_2018	MK645909	CAN10247.1		-0.21779	0.032353	0.0608372	0.0637147
China_wbBS01_2018	MK645909	AJL34224.1		0.24914	0.40515	0.0560782	0.0523371
China_wbBS01_2018	MK645909	AOO54437.1		0.0704017	0.191528	0.0290467	0.0284441
China_wbBS01_2018	MK645909	AOO54474.1		-0.105526	0	0.0374893	0.0386849
China_wbBS01_2018	MK645909	AOO54492.1		-0.211004	0	0.049333	0.052363
China_wbBS01_2018	MK645909	AOO54502.1		-0.0359845	0.273897	0.0412734	0.0466596
China_wbBS01_2018	MK645909	AOO54531.1		0.111302	0	0.0997999	0.0971823
China_wbBS01_2018	MK645909	AXZ95928.1		0.179475	0.532107	0.0746766	0.0711761
Ukraine_Kyiv_2014	MN194591	QED21572.1		0.640931	0.466872	0.0840013	0.0652047
Ukraine_Kyiv_2014	MN194591	QED21584.1		0.031158	1.6e-05	0.119832	0.119663
Ukraine_Kyiv_2014	MN194591	QED21585.1		0.250648	0	0.128434	0.120093
Ukraine_Kyiv_2014	MN194591	QED21586.1		0.283355	0	0.147933	0.14
Ukraine_Kyiv_2014	MN194591	QED21619.1		-0.10424	0.137836	0.039614	0.0396256
Ukraine_Kyiv_2014	MN194591	QED21684.1		0.293167	0.699687	0.092367	0.0762557
Ukraine_Kyiv_2014	MN194591	QED21688.1		-0.261974	0	0.0272174	0.0295818
Ukraine_Kyiv_2014	MN194591	QED21730.1		-0.0221495	0.206056	0.0480729	0.0482401
Ukraine_Kyiv_2014	MN194591	QED21762.1		-0.245281	0	0.0494282	0.0533114
Ukraine_Kyiv_2014	MN194591	QED21768.1		-0.173507	0.126011	0.0614805	0.0648525
Ukraine_Kyiv_2014	MN194591	QED21776.1		0.0933254	0.122741	0.0921827	0.089363
Ukraine_Kyiv_2014	MN194591	CBW46699.1		0.196153	0	0.0490929	0.0467336
Ukraine_Kyiv_2014	MN194591	CBW46738.1		-0.162777	0	0.0184532	0.0227558
Ukraine_Kyiv_2014	MN194591	AOO54376.1		-0.214439	0.683979	0.0306749	0.0375462
Ukraine_Kyiv_2014	MN194591	AOO54437.1		0.164386	0	0.0298608	0.0284441
Ukraine_Kyiv_2014	MN194591	AOO54474.1		-0.170188	0.038324	0.0362531	0.0407577
Ukraine_Kyiv_2014	MN194591	AOO54487.1		-0.0653066	0	0.0431239	0.0482401
Ukraine_Kyiv_2014	MN194591	AOO54492.1		-0.162691	0	0.0504215	0.0528895
Ukraine_Kyiv_2014	MN194591	AOO54502.1		-0.0684045	0.365666	0.0426403	0.0466596
Ukraine_Kyiv_2014	MN194591	AOO54531.1		0.111302	0.040621	0.0997999	0.0971823
Ukraine_Kyiv_2014	MN194591	AXZ95928.1		-0.223322	0.224965	0.0776239	0.0794119
Zambia_LIV_1983	MN318203	QGM12675.1		-0.179535	1.48409	0.120127	0.120333
Zambia_LIV_1983	MN318203	QGM12695.1		0.0057641	0	0.116739	0.118168
Zambia_LIV_1983	MN318203	QGM12696.1		0.32245	0	0.151835	0.14
Zambia_LIV_1983	MN318203	QGM12707.1		0.0861623	0.153922	0.0527815	0.0523371
Zambia_LIV_1983	MN318203	CAN10254.1		0.0186556	0	0.0922901	0.09048
Zambia_LIV_1983	MN318203	CBW46691.1		-0.0385719	1.5947	0.116017	0.119201
Zambia_LIV_1983	MN318203	CBW46699.1		0.20596	0	0.0539675	0.0524328
Zambia_LIV_1983	MN318203	AOO54368.1		-0.197222	0	0.0708883	0.0750022
Zambia_LIV_1983	MN318203	AOO54369.1		-0.197222	0	0.0507427	0.0529105
Zambia_LIV_1983	MN318203	AOO54437.1		0.104231	0.623989	0.0302276	0.0295818
Zambia_LIV_1983	MN318203	AOO54474.1		-0.104575	0	0.0367858	0.0420983
Zambia_LIV_1983	MN318203	AOO54492.1		-0.0241114	0	0.0521333	0.0523371
Zambia_LIV_1983	MN318203	AOO54502.1		-0.155637	0	0.0439949	0.044532
Zambia_LIV_1983	MN318203	AOO54531.1		0.0892703	0	0.0943751	0.0910404
Zambia_LIV_1983	MN318203	AOO54532.1		0.0721045	0	0.0954228	0.0927141
Zambia_LIV_1983	MN318203	SPS73439.1		0.404801	0.457467	0.0786237	0.0665904
South_Africa_2_2008	MN336500	QGM12799.1		0.0077411	0.620468	0.119832	0.117064
South_Africa_2_2008	MN336500	QGM12817.1		0.0426002	0	0.12045	0.119494
South_Africa_2_2008	MN336500	QGM12818.1		0.330846	0	0.146467	0.138854
South_Africa_2_2008	MN336500	CAN10254.1		0.202135	0.191352	0.0951302	0.088246
South_Africa_2_2008	MN336500	CBW46676.1		-0.169658	0.434341	0.149782	0.155943
South_Africa_2_2008	MN336500	CBW46699.1		0.274838	0	0.0521182	0.0501531
South_Africa_2_2008	MN336500	AOO54368.1		-0.20755	0.304227	0.0630112	0.0692933
South_Africa_2_2008	MN336500	AOO54369.1		-0.20755	0.304227	0.0457357	0.0461784
South_Africa_2_2008	MN336500	AOO54437.1		0.0704017	0.441675	0.0290467	0.0284441
South_Africa_2_2008	MN336500	AOO54474.1		-0.113279	0	0.0361023	0.0398227
South_Africa_2_2008	MN336500	AOO54492.1		-0.06569	0	0.0490376	0.0511993
South_Africa_2_2008	MN336500	AOO54531.1		0.178314	0	0.0951302	0.088246
South_Africa_2_2008	MN336500	AOO54532.1		0.178314	0	0.0997999	0.0971823
South_Africa_2_2008	MN336500	QED21688.1		-0.260802	0	0.0286145	0.0307196
South_Africa_2_2008	MN336500	QGM12778.1		-0.154392	0	0.0619721	0.0648691
South_Africa_1985	MN394630	QGM12892.1		0.0552144	0	0.120152	0.117455
South_Africa_1985	MN394630	QGM12893.1		0.160527	0	0.145129	0.136949
South_Africa_1985	MN394630	QGM12901.1		0.0643108	0.120363	0.0529524	0.0523371
South_Africa_1985	MN394630	CAN10174.1		0.0576008	0	0.0324036	0.0352716
South_Africa_1985	MN394630	CAN10254.1		0.0882339	0	0.0950843	0.089363
South_Africa_1985	MN394630	CBW46699.1		0.15182	0	0.0511533	0.049012
South_Africa_1985	MN394630	AOO54368.1		-0.20755	0	0.0646312	0.0714931
South_Africa_1985	MN394630	AOO54369.1		-0.20755	0	0.0495148	0.050659
South_Africa_1985	MN394630	AOO54437.1		0.18195	0.237547	0.0300015	0.0261685
South_Africa_1985	MN394630	AOO54474.1		-0.251896	0	0.036635	0.0386849
South_Africa_1985	MN394630	AOO54492.1		-0.093704	0	0.0547666	0.0557504
South_Africa_1985	MN394630	AOO54531.1		0.0973227	0	0.0950843	0.089363
South_Africa_1985	MN394630	AOO54532.1		0.0973227	0	0.0989854	0.0966437
South_Africa_1985	MN394630	QED21688.1		-0.250833	0	0.0272174	0.0295818
South_Africa_1985	MN394630	QGM12778.1		-0.151924	0.084098	0.0657018	0.0694035
