# Supplementary material for: ASFVdb: an integrative resource for genomic and proteomic analyses of African swine fever virus
Source: Oxford University Press journal article supplement (doi:10.1093/database/baaa023), 2020-01-01
Supplement: supplementary_figures_baaa023.pdf [file supplementary_figures_baaa023.pdf]

## Supplementary Figures

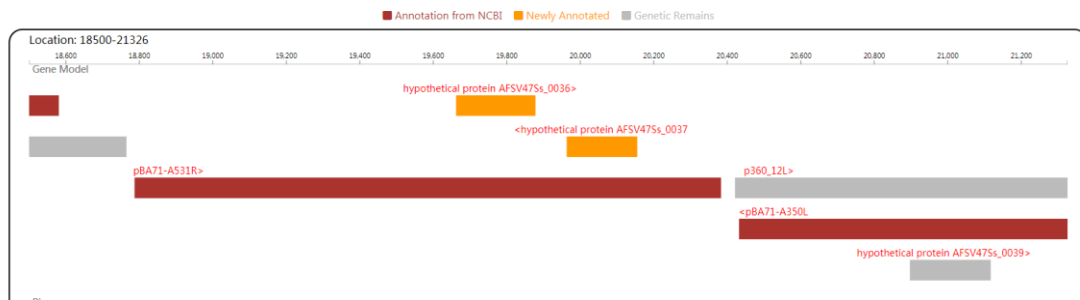

Figure S1. A snapshot displaying the inclusion of alternative splicing cases in ASFVdb. As shown in the figure, 'pBA71-A531R', coloured in red, is possibly transcribed in the forms of "hypothetical protein AFSV47Ss\_0036" and "hypothetical protein AFSV47Ss\_0037", coloured in orange.

A

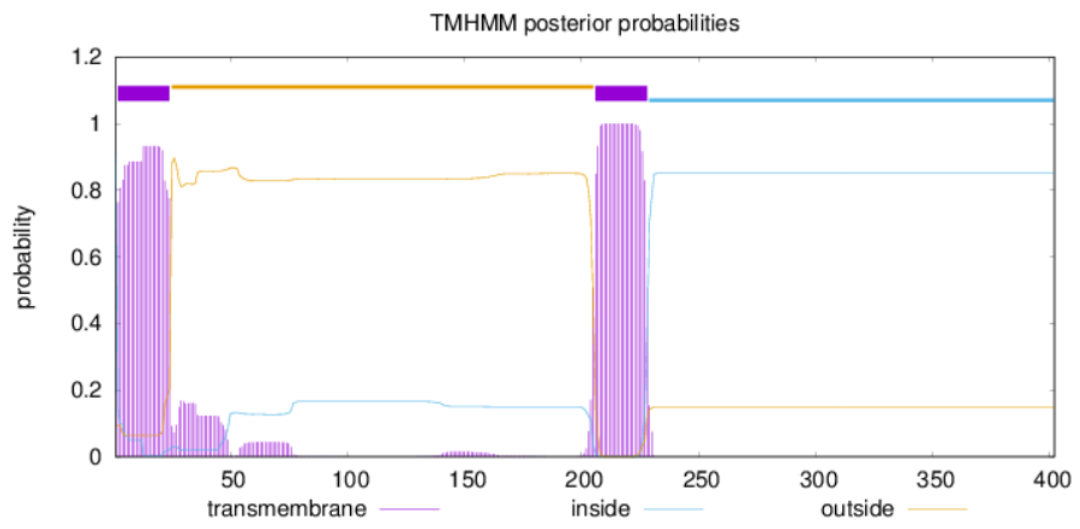

# B

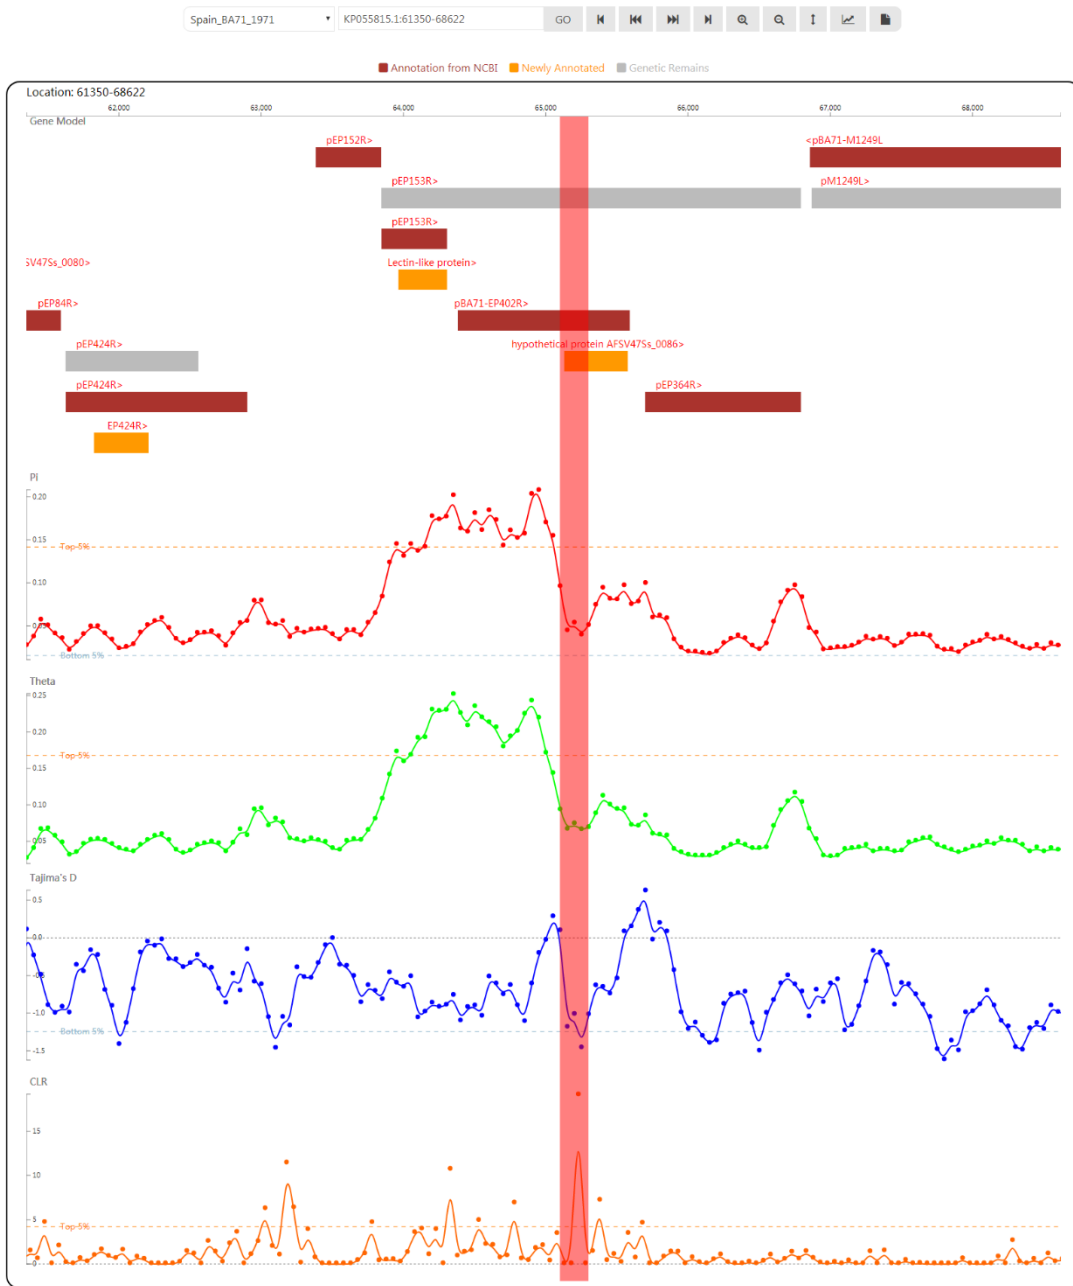

C

Orthologous in Strains

| Strain                              | Availability | Status             | Gene                                                     |
|-------------------------------------|--------------|--------------------|----------------------------------------------------------|
| Spain_BA71_1971                     | ✓            | Protein            | <a href="#">AKO62740.1</a>                               |
| China_AnhuiXCGQ_2018                | ✗            |                    |                                                          |
| China_ASFV-SY18_2018                | ✗            |                    |                                                          |
| Poland_Pol16_20186_o7_2016-2017     | ✗            |                    |                                                          |
| Poland_Pol16_20538_o9_2016-2017     | ✗            |                    |                                                          |
| Poland_Pol16_20540_o10_2016-2017    | ✗            |                    |                                                          |
| Poland_Pol16_29413_o23_2016-2017    | ✗            |                    |                                                          |
| Poland_Pol17_03029_C201_2016-2017   | ✗            |                    |                                                          |
| Poland_Pol17_04461_C210_2016-2017   | ✗            |                    |                                                          |
| Poland_Pol17_05838_C220_2016-2017   | ✗            |                    |                                                          |
| Poland_ASFV_POL_Podlaskie_2015      | ✗            |                    |                                                          |
| Uganda_R8_2015                      | ✗            |                    |                                                          |
| Uganda_R7_2015                      | ✗            |                    |                                                          |
| Uganda_R25_2015                     | ✗            |                    |                                                          |
| Uganda_N10_2015                     | ✗            |                    |                                                          |
| Uganda_R35_2015                     | ✗            |                    |                                                          |
| Estonia_2014                        | ✗            |                    |                                                          |
| Italy_26544_OG10_2010               | ✓            | Protein            | <a href="#">AJZ77076.1</a>                               |
| Italy_47_Ss_2008_2008               | ✓            | Protein            | <a href="#">AOO54390.1</a>                               |
| Portugal_OURT_88.3_1988             | ✓            | Protein            | <a href="#">CAN10406.1</a>                               |
| Spain_E75_1975                      | ✓            | Protein            | <a href="#">CBH29159.1</a>                               |
| Russia_Georgia_2007                 | ✗            |                    |                                                          |
| Kenya_Tk1_2005                      | ✗            |                    |                                                          |
| Kenya_Bus_2006                      | ✗            |                    |                                                          |
| Russia_Odintsovo_2014               | ✗            |                    |                                                          |
| Portugal_L60_1960                   | ✗            |                    |                                                          |
| Portugal_NHV_1968                   | ✓            | Protein            | <a href="#">AIY22408.1</a>                               |
| Russia_Kashino_2013                 | ✗            |                    |                                                          |
| Benin_1997                          | ✓            | Protein<br>Protein | <a href="#">CAN10158.1</a><br><a href="#">CAN10158.1</a> |
| South_Africa_KNP_Pretorisuskop_1996 | ✗            |                    |                                                          |
| South_Africa_MGR_Mkuzi_1979         | ✓            | Protein            | <a href="#">AIY22249.1</a>                               |
| Malawi_Lil_1983                     | ✗            |                    |                                                          |
| Kenya_1950                          | ✗            |                    |                                                          |
| Namibia_Warthog_1980                | ✓            | Protein            | <a href="#">QGM12720.1</a>                               |
| South_Africa_Warmbaths_1987         | ✗            |                    |                                                          |
| Malawi_Tengani_1962                 | ✗            |                    |                                                          |
| China_HLJ_2018                      | ✗            |                    |                                                          |
| China_LN_2018                       | ✗            |                    |                                                          |
| China_wbBS01_2018                   | ✗            |                    |                                                          |
| Ukraine_Kyiv_2014                   | ✗            |                    |                                                          |
| Belgium_Etalle_wb_2018              | ✗            |                    |                                                          |
| Lithuania_LT14_2014                 | ✗            |                    |                                                          |
| South_Africa_1985                   | ✗            |                    |                                                          |
| South_Africa_2_2008                 | ✗            |                    |                                                          |
| Zambia_LIV_1983                     | ✗            |                    |                                                          |

**D**

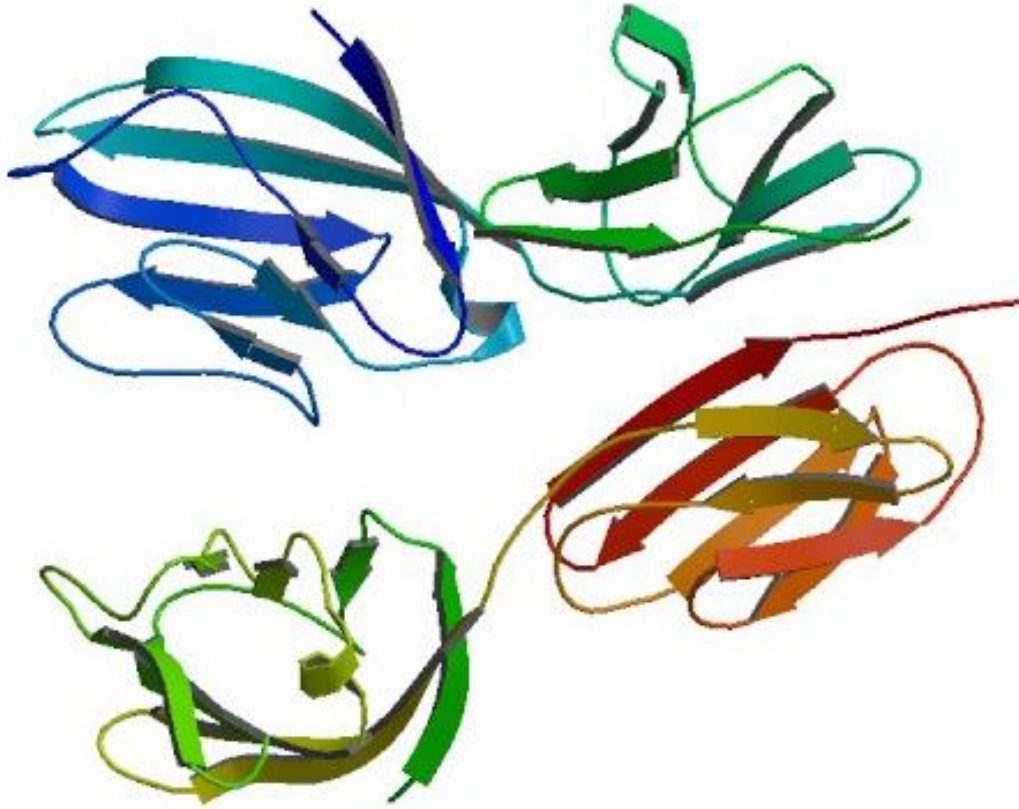

Figure S2. Analysis results of EP402R in ASFVdb. A shows the transmembrane prediction of EP402R in Spain\_BA71\_1971. B shows the population test statistic results for Spain\_BA71\_1971, where the red bar marks the region with a Tajima's D valley and a CLR peak in EP402R. C shows the representation of EP402R in different strains. D shows the 3D structure of the cell adhesion molecule CD2 from the PDB, which is similar to EP402R (E-value<0.05).
